# Supplementary material for: Influence of basement heterogeneity on the architecture of low subsidence rate Paleozoic intracratonic basins (Ahnet and Mouydir basins, Central Sahara)
Source: Copernicus journal article supplement (doi:10.5194/se-2018-50), 2018-06-27
Supplement: Supplementary file 1 [file Supplementary data 4 datation compilation.xls]

## Sheet: Geochronological data
ID	X	Y	Z	Sample	Name	Area	Zone	Terranes-Basins	Rock type	Method	On (Minx)	Age (Ma)	(±) or (+) Ma	(-) Ma	Age_Final (Ma)	Chronostratigraphy	Events_Interpretation	Event_Classification	References
1	9.48965	24.5593		TOD53	Djanet batholith	Djanet	East Hoggar	Djanet	Monzogranite	Sm-Nd & Rb-Sr TDM	Whole Rock	1441			1441	Meso-protezozoic	(1600-1200) Pre-Pan-African	Ante-Pan-African	Fezaa et al., 2010
2	9.6793	24.4125		TOD55	Tin Bedjane pluton	Tin Bedjane	East Hoggar	Djanet	Syenogranite	Sm-Nd & Rb-Sr TDM	Whole Rock	1742			1742	Paleo-proterozoic	Eburnean Orogeny	Eburnean Orogeny	Fezaa et al., 2010
3	9.6793	24.4125		TOD56	Tin Bedjane pluton	Tin Bedjane	East Hoggar	Djanet	Syenogranite	Sm-Nd & Rb-Sr TDM	Whole Rock	1820			1820	Paleo-proterozoic	Eburnean Orogeny	Eburnean Orogeny	Fezaa et al., 2010
4	9.72782	24.3624		TOD73	Djanet batholith	Djanet	East Hoggar	Djanet	Biotite-rich enclave	Sm-Nd & Rb-Sr TDM	Whole Rock	1629			1629	Paleo-proterozoic	Eburnean Orogeny	Eburnean Orogeny	Fezaa et al., 2010
5	9.72782	24.3624		TOD74	Djanet batholith	Djanet	East Hoggar	Djanet	Monzogranite	Sm-Nd & Rb-Sr TDM	Whole Rock	1766			1766	Paleo-proterozoic	Eburnean Orogeny	Eburnean Orogeny	Fezaa et al., 2010
6	9.75063	24.3676		J48	Tin Amali dyke swarm	Tin Amali	East Hoggar	Djanet	Granodiorite	Sm-Nd & Rb-Sr TDM	Whole Rock	1564			1564	Meso-protezozoic	(1600-1200) Pre-Pan-African	Ante-Pan-African	Fezaa et al., 2010
7	9.75063	24.3676		J47	Tin Amali dyke swarm	Tin Amali	East Hoggar	Djanet	Granodiorite	Sm-Nd & Rb-Sr TDM	Whole Rock	1618			1618	Paleo-proterozoic	Eburnean Orogeny	Eburnean Orogeny	Fezaa et al., 2010
8	9.75063	24.3676		J38	Tin Amali dyke swarm	Tin Amali	East Hoggar	Djanet	Granodiorite	Sm-Nd & Rb-Sr TDM	Whole Rock	1588			1588	Meso-protezozoic	(1600-1200) Pre-Pan-African	Ante-Pan-African	Fezaa et al., 2010
9	9.75063	24.3676		J35	Tin Amali dyke swarm	Tin Amali	East Hoggar	Djanet	Monzogranite	Sm-Nd & Rb-Sr TDM	Whole Rock	1579			1579	Meso-protezozoic	(1600-1200) Pre-Pan-African	Ante-Pan-African	Fezaa et al., 2010
10	9.75063	24.3676		J45	Tin Amali dyke swarm	Tin Amali	East Hoggar	Djanet	Monzogranite	Sm-Nd & Rb-Sr TDM	Whole Rock	1628			1628	Paleo-proterozoic	Eburnean Orogeny	Eburnean Orogeny	Fezaa et al., 2010
11	9.75063	24.3676		J34	Tin Amali dyke swarm	Tin Amali	East Hoggar	Djanet	Monzogranite	Sm-Nd & Rb-Sr TDM	Whole Rock	1691			1691	Paleo-proterozoic	Eburnean Orogeny	Eburnean Orogeny	Fezaa et al., 2010
12	9.75063	24.3676		J36	Tin Amali dyke swarm	Tin Amali	East Hoggar	Djanet	Monzogranite	Sm-Nd & Rb-Sr TDM	Whole Rock	1582			1582	Meso-protezozoic	(1600-1200) Pre-Pan-African	Ante-Pan-African	Fezaa et al., 2010
13	9.75063	24.3676		J44	Tin Amali dyke swarm	Tin Amali	East Hoggar	Djanet	Monzogranite	Sm-Nd & Rb-Sr TDM	Whole Rock	1470			1470	Meso-protezozoic	(1600-1200) Pre-Pan-African	Ante-Pan-African	Fezaa et al., 2010
14	9.75063	24.3676		J17	Tin Amali dyke swarm	Tin Amali	East Hoggar	Djanet	Monzogranite	Sm-Nd & Rb-Sr TDM	Whole Rock	1656			1656	Paleo-proterozoic	Eburnean Orogeny	Eburnean Orogeny	Fezaa et al., 2010
15	9.75063	24.3676		J43	Tin Amali dyke swarm	Tin Amali	East Hoggar	Djanet	Syenogranite	Sm-Nd & Rb-Sr TDM	Whole Rock	1562			1562	Meso-protezozoic	(1600-1200) Pre-Pan-African	Ante-Pan-African	Fezaa et al., 2010
16	9.75063	24.3676		TOD59	Tin Amali dyke swarm	Tin Amali	East Hoggar	Djanet	Syenogranite	Sm-Nd & Rb-Sr TDM	Whole Rock	1645			1645	Paleo-proterozoic	Eburnean Orogeny	Eburnean Orogeny	Fezaa et al., 2010
17	9.75063	24.3676		J16	Tin Amali dyke swarm	Tin Amali	East Hoggar	Djanet	Syenogranite	Sm-Nd & Rb-Sr TDM	Whole Rock	1653			1653	Paleo-proterozoic	Eburnean Orogeny	Eburnean Orogeny	Fezaa et al., 2010
18	9.75063	24.3676		J36e	Tin Amali dyke swarm	Tin Amali	East Hoggar	Djanet	MME	Sm-Nd & Rb-Sr TDM	Whole Rock	1706			1706	Paleo-proterozoic	Eburnean Orogeny	Eburnean Orogeny	Fezaa et al., 2010
19	9.2827	24.6091		J4	Djanet batholith	Djanet	East Hoggar	Djanet	Monzogranite	Sm-Nd & Rb-Sr TDM	Whole Rock	1712			1712	Paleo-proterozoic	Eburnean Orogeny	Eburnean Orogeny	Fezaa et al., 2010
20	9.28842	24.5883		J6	Djanet batholith	Djanet	East Hoggar	Djanet	Monzogranite	Sm-Nd & Rb-Sr TDM	Whole Rock	1719			1719	Paleo-proterozoic	Eburnean Orogeny	Eburnean Orogeny	Fezaa et al., 2010
21	9.80446	24.2595		J19	Djanet batholith	Djanet	East Hoggar	Djanet	Monzogranite	Sm-Nd & Rb-Sr TDM	Whole Rock	1670			1670	Paleo-proterozoic	Eburnean Orogeny	Eburnean Orogeny	Fezaa et al., 2010
22	9.50372	24.4799		DJ1	Djanet batholith	Djanet	East Hoggar	Djanet	Monzogranite	Sm-Nd & Rb-Sr TDM	Whole Rock	1552			1552	Meso-protezozoic	(1600-1200) Pre-Pan-African	Ante-Pan-African	Fezaa et al., 2010
23	9.50372	24.4799		DJ6	Djanet batholith	Djanet	East Hoggar	Djanet	Monzogranite	Sm-Nd & Rb-Sr TDM	Whole Rock	1486			1486	Meso-protezozoic	(1600-1200) Pre-Pan-African	Ante-Pan-African	Fezaa et al., 2010
24	9.43477	24.6581		DJ10	Djanet batholith	Djanet	East Hoggar	Djanet	Monzogranite	Sm-Nd & Rb-Sr TDM	Whole Rock	2288			2288	Paleo-proterozoic	Eburnean Orogeny	Eburnean Orogeny	Fezaa et al., 2010
25	9.16043	24.7049		J9	Djanet batholith	Djanet	East Hoggar	Djanet	Monzogranite	Sm-Nd & Rb-Sr TDM	Whole Rock	1377			1377	Meso-protezozoic	(1600-1200) Pre-Pan-African	Ante-Pan-African	Fezaa et al., 2010
26	9.80446	24.2595		J21	Djanet batholith	Djanet	East Hoggar	Djanet	Monzogranite	Sm-Nd & Rb-Sr TDM	Whole Rock	1707			1707	Paleo-proterozoic	Eburnean Orogeny	Eburnean Orogeny	Fezaa et al., 2010
27	9.84581	24.2127		J18	Djanet batholith	Djanet	East Hoggar	Djanet	Monzogranite	Sm-Nd & Rb-Sr TDM	Whole Rock	1816			1816	Paleo-proterozoic	Eburnean Orogeny	Eburnean Orogeny	Fezaa et al., 2010
28	9.20802	24.6455		J8	Djanet batholith	Djanet	East Hoggar	Djanet	Granodiorite	Sm-Nd & Rb-Sr TDM	Whole Rock	1499			1499	Meso-protezozoic	(1600-1200) Pre-Pan-African	Ante-Pan-African	Fezaa et al., 2010
29	9.50372	24.4799		DJ7	Djanet batholith	Djanet	East Hoggar	Djanet	MME	Sm-Nd & Rb-Sr TDM	Whole Rock	1468			1468	Meso-protezozoic	(1600-1200) Pre-Pan-African	Ante-Pan-African	Fezaa et al., 2010
30	9.43477	24.6581		DJ8a	Djanet batholith	Djanet	East Hoggar	Djanet	Granular enclave	Sm-Nd & Rb-Sr TDM	Whole Rock	3946			3946	Archean	Ouzzalian Orogeny	Archean	Fezaa et al., 2010
31	9.25224	24.6575		J7e	Djanet batholith	Djanet	East Hoggar	Djanet	Granular enclave	Sm-Nd & Rb-Sr TDM	Whole Rock	2385			2385	Paleo-proterozoic	Eburnean Orogeny	Eburnean Orogeny	Fezaa et al., 2010
32	9.50372	24.4799		DJ2	Djanet batholith	Djanet	East Hoggar	Djanet	Granular enclave	Sm-Nd & Rb-Sr TDM	Whole Rock	1564			1564	Meso-protezozoic	(1600-1200) Pre-Pan-African	Ante-Pan-African	Fezaa et al., 2010
33	9.50372	24.4799		DJ5	Djanet batholith	Djanet	East Hoggar	Djanet	Granular enclave	Sm-Nd & Rb-Sr TDM	Whole Rock	1407			1407	Meso-protezozoic	(1600-1200) Pre-Pan-African	Ante-Pan-African	Fezaa et al., 2010
34	9.43477	24.6581		DJ8c	Djanet batholith	Djanet	East Hoggar	Djanet	Granular enclave	Sm-Nd & Rb-Sr TDM	Whole Rock	1592			1592	Meso-protezozoic	(1600-1200) Pre-Pan-African	Ante-Pan-African	Fezaa et al., 2010
35	9.20802	24.6455		J8e	Djanet batholith	Djanet	East Hoggar	Djanet	Biotite-rich enclave	Sm-Nd & Rb-Sr TDM	Whole Rock	N/D			N/D				Fezaa et al., 2010
36	9.72782	24.3624		TOD73	Djanet batholith	Djanet	East Hoggar	Djanet	Biotite-rich enclave	Sm-Nd & Rb-Sr TDM	Whole Rock	1629			N/A	Paleo-proterozoic	Eburnean Orogeny	Eburnean Orogeny	Fezaa et al., 2010
37	9.43477	24.6581		DJ8b	Djanet batholith	Djanet	East Hoggar	Djanet	Biotite-rich enclave	Sm-Nd & Rb-Sr TDM	Whole Rock	1859			N/A	Paleo-proterozoic	Eburnean Orogeny	Eburnean Orogeny	Fezaa et al., 2010
38	9.1569	24.6541		J11	Djanet batholith	Djanet	East Hoggar	Djanet	Xenolith	Sm-Nd & Rb-Sr TDM	Whole Rock	1828			N/A	Paleo-proterozoic	Eburnean Orogeny	Eburnean Orogeny	Fezaa et al., 2010
39	9.48965	24.5593		TOD53	Djanet batholith	Djanet	East Hoggar	Djanet	Monzogranite	Sm-Nd & Rb-Sr TDM	Whole Rock	1429			N/A	Meso-protezozoic	(1600-1200) Pre-Pan-African	Ante-Pan-African	Fezaa et al., 2010
40	9.6793	24.4125		TOD55	Tin Bedjane pluton	Tin Bedjane	East Hoggar	Djanet	Syenogranite	Sm-Nd & Rb-Sr TDM	Whole Rock	2650			N/A	Archean	Liberian Orogeny	Archean	Fezaa et al., 2010
41	9.6793	24.4125		TOD56	Tin Bedjane pluton	Tin Bedjane	East Hoggar	Djanet	Syenogranite	Sm-Nd & Rb-Sr TDM	Whole Rock	1847			N/A	Paleo-proterozoic	Eburnean Orogeny	Eburnean Orogeny	Fezaa et al., 2010
42	9.72782	24.3624		TOD73	Djanet batholith	Djanet	East Hoggar	Djanet	Biotite-rich enclave	Sm-Nd & Rb-Sr TDM	Whole Rock	1707			N/A	Paleo-proterozoic	Eburnean Orogeny	Eburnean Orogeny	Fezaa et al., 2010
43	9.72782	24.3624		TOD74	Djanet batholith	Djanet	East Hoggar	Djanet	Monzogranite	Sm-Nd & Rb-Sr TDM	Whole Rock	1802			N/A	Paleo-proterozoic	Eburnean Orogeny	Eburnean Orogeny	Fezaa et al., 2010
44	9.75063	24.3676		J48	Tin Amali dyke swarm	Tin Amali	East Hoggar	Djanet	Granodiorite	Sm-Nd & Rb-Sr TDM	Whole Rock	1701			N/A	Paleo-proterozoic	Eburnean Orogeny	Eburnean Orogeny	Fezaa et al., 2010
45	9.75063	24.3676		J47	Tin Amali dyke swarm	Tin Amali	East Hoggar	Djanet	Granodiorite	Sm-Nd & Rb-Sr TDM	Whole Rock	1739			N/A	Paleo-proterozoic	Eburnean Orogeny	Eburnean Orogeny	Fezaa et al., 2010
46	9.75063	24.3676		J38	Tin Amali dyke swarm	Tin Amali	East Hoggar	Djanet	Granodiorite	Sm-Nd & Rb-Sr TDM	Whole Rock	1740			N/A	Paleo-proterozoic	Eburnean Orogeny	Eburnean Orogeny	Fezaa et al., 2010
47	9.75063	24.3676		J35	Tin Amali dyke swarm	Tin Amali	East Hoggar	Djanet	Monzogranite	Sm-Nd & Rb-Sr TDM	Whole Rock	1729			N/A	Paleo-proterozoic	Eburnean Orogeny	Eburnean Orogeny	Fezaa et al., 2010
48	9.75063	24.3676		J45	Tin Amali dyke swarm	Tin Amali	East Hoggar	Djanet	Monzogranite	Sm-Nd & Rb-Sr TDM	Whole Rock	1741			N/A	Paleo-proterozoic	Eburnean Orogeny	Eburnean Orogeny	Fezaa et al., 2010
49	9.75063	24.3676		J34	Tin Amali dyke swarm	Tin Amali	East Hoggar	Djanet	Monzogranite	Sm-Nd & Rb-Sr TDM	Whole Rock	1763			N/A	Paleo-proterozoic	Eburnean Orogeny	Eburnean Orogeny	Fezaa et al., 2010
50	9.75063	24.3676		J36	Tin Amali dyke swarm	Tin Amali	East Hoggar	Djanet	Monzogranite	Sm-Nd & Rb-Sr TDM	Whole Rock	1721			N/A	Paleo-proterozoic	Eburnean Orogeny	Eburnean Orogeny	Fezaa et al., 2010
51	9.75063	24.3676		J44	Tin Amali dyke swarm	Tin Amali	East Hoggar	Djanet	Monzogranite	Sm-Nd & Rb-Sr TDM	Whole Rock	1684			N/A	Paleo-proterozoic	Eburnean Orogeny	Eburnean Orogeny	Fezaa et al., 2010
52	9.75063	24.3676		J17	Tin Amali dyke swarm	Tin Amali	East Hoggar	Djanet	Monzogranite	Sm-Nd & Rb-Sr TDM	Whole Rock	1756			N/A	Paleo-proterozoic	Eburnean Orogeny	Eburnean Orogeny	Fezaa et al., 2010
53	9.75063	24.3676		J43	Tin Amali dyke swarm	Tin Amali	East Hoggar	Djanet	Syenogranite	Sm-Nd & Rb-Sr TDM	Whole Rock	1708			N/A	Paleo-proterozoic	Eburnean Orogeny	Eburnean Orogeny	Fezaa et al., 2010
54	9.75063	24.3676		TOD59	Tin Amali dyke swarm	Tin Amali	East Hoggar	Djanet	Syenogranite	Sm-Nd & Rb-Sr TDM	Whole Rock	1750			N/A	Paleo-proterozoic	Eburnean Orogeny	Eburnean Orogeny	Fezaa et al., 2010
55	9.75063	24.3676		J16	Tin Amali dyke swarm	Tin Amali	East Hoggar	Djanet	Syenogranite	Sm-Nd & Rb-Sr TDM	Whole Rock	1756			N/A	Paleo-proterozoic	Eburnean Orogeny	Eburnean Orogeny	Fezaa et al., 2010
56	9.75063	24.3676		J36e	Tin Amali dyke swarm	Tin Amali	East Hoggar	Djanet	MME	Sm-Nd & Rb-Sr TDM	Whole Rock	1660			1660	Paleo-proterozoic	Eburnean Orogeny	Eburnean Orogeny	Fezaa et al., 2010
57	9.2827	24.6091		J4	Djanet batholith	Djanet	East Hoggar	Djanet	Monzogranite	Sm-Nd & Rb-Sr TDM	Whole Rock	1501			1501	Meso-protezozoic	(1600-1200) Pre-Pan-African	Ante-Pan-African	Fezaa et al., 2010
58	9.28842	24.5883		J6	Djanet batholith	Djanet	East Hoggar	Djanet	Monzogranite	Sm-Nd & Rb-Sr TDM	Whole Rock	1479			1479	Meso-protezozoic	(1600-1200) Pre-Pan-African	Ante-Pan-African	Fezaa et al., 2010
59	9.80446	24.2595		J19	Djanet batholith	Djanet	East Hoggar	Djanet	Monzogranite	Sm-Nd & Rb-Sr TDM	Whole Rock	1778			1778	Paleo-proterozoic	Eburnean Orogeny	Eburnean Orogeny	Fezaa et al., 2010
60	9.50372	24.4799		DJ1	Djanet batholith	Djanet	East Hoggar	Djanet	Monzogranite	Sm-Nd & Rb-Sr TDM	Whole Rock	1612			1612	Paleo-proterozoic	Eburnean Orogeny	Eburnean Orogeny	Fezaa et al., 2010
61	9.50372	24.4799		DJ6	Djanet batholith	Djanet	East Hoggar	Djanet	Monzogranite	Sm-Nd & Rb-Sr TDM	Whole Rock	1529			1529	Meso-protezozoic	(1600-1200) Pre-Pan-African	Ante-Pan-African	Fezaa et al., 2010
62	9.43477	24.6581		DJ10	Djanet batholith	Djanet	East Hoggar	Djanet	Monzogranite	Sm-Nd & Rb-Sr TDM	Whole Rock	2048			2048	Paleo-proterozoic	Eburnean Orogeny	Eburnean Orogeny	Fezaa et al., 2010
63	9.16043	24.7049		J9	Djanet batholith	Djanet	East Hoggar	Djanet	Monzogranite	Sm-Nd & Rb-Sr TDM	Whole Rock	1372			1372	Meso-protezozoic	(1600-1200) Pre-Pan-African	Ante-Pan-African	Fezaa et al., 2010
64	9.80446	24.2595		J21	Djanet batholith	Djanet	East Hoggar	Djanet	Monzogranite	Sm-Nd & Rb-Sr TDM	Whole Rock	1765			1765	Paleo-proterozoic	Eburnean Orogeny	Eburnean Orogeny	Fezaa et al., 2010
65	9.84581	24.2127		J18	Djanet batholith	Djanet	East Hoggar	Djanet	Monzogranite	Sm-Nd & Rb-Sr TDM	Whole Rock	1797			1797	Paleo-proterozoic	Eburnean Orogeny	Eburnean Orogeny	Fezaa et al., 2010
66	9.20802	24.6455		J8	Djanet batholith	Djanet	East Hoggar	Djanet	Granodiorite	Sm-Nd & Rb-Sr TDM	Whole Rock	1487			1487	Meso-protezozoic	(1600-1200) Pre-Pan-African	Ante-Pan-African	Fezaa et al., 2010
67	9.50372	24.4799		DJ7	Djanet batholith	Djanet	East Hoggar	Djanet	MME	Sm-Nd & Rb-Sr TDM	Whole Rock	1446			1446	Meso-protezozoic	(1600-1200) Pre-Pan-African	Ante-Pan-African	Fezaa et al., 2010
68	9.43477	24.6581		DJ8a	Djanet batholith	Djanet	East Hoggar	Djanet	Granular enclave	Sm-Nd & Rb-Sr TDM	Whole Rock	1878			1878	Paleo-proterozoic	Eburnean Orogeny	Eburnean Orogeny	Fezaa et al., 2010
69	9.25224	24.6575		J7e	Djanet batholith	Djanet	East Hoggar	Djanet	Granular enclave	Sm-Nd & Rb-Sr TDM	Whole Rock	1543			1543	Meso-protezozoic	(1600-1200) Pre-Pan-African	Ante-Pan-African	Fezaa et al., 2010
70	9.50372	24.4799		DJ2	Djanet batholith	Djanet	East Hoggar	Djanet	Granular enclave	Sm-Nd & Rb-Sr TDM	Whole Rock	1573			1573	Meso-protezozoic	(1600-1200) Pre-Pan-African	Ante-Pan-African	Fezaa et al., 2010
71	9.50372	24.4799		DJ5	Djanet batholith	Djanet	East Hoggar	Djanet	Granular enclave	Sm-Nd & Rb-Sr TDM	Whole Rock	1338			1338	Meso-protezozoic	(1600-1200) Pre-Pan-African	Ante-Pan-African	Fezaa et al., 2010
72	9.43477	24.6581		DJ8c	Djanet batholith	Djanet	East Hoggar	Djanet	Granular enclave	Sm-Nd & Rb-Sr TDM	Whole Rock	1708			1708	Paleo-proterozoic	Eburnean Orogeny	Eburnean Orogeny	Fezaa et al., 2010
73	9.20802	24.6455		J8e	Djanet batholith	Djanet	East Hoggar	Djanet	Biotite-rich enclave	Sm-Nd & Rb-Sr TDM	Whole Rock	1795			1795	Paleo-proterozoic	Eburnean Orogeny	Eburnean Orogeny	Fezaa et al., 2010
74	9.72782	24.3624		TOD73	Djanet batholith	Djanet	East Hoggar	Djanet	Biotite-rich enclave	Sm-Nd & Rb-Sr TDM	Whole Rock	1707			1707	Paleo-proterozoic	Eburnean Orogeny	Eburnean Orogeny	Fezaa et al., 2010
75	9.43477	24.6581		DJ8b	Djanet batholith	Djanet	East Hoggar	Djanet	Biotite-rich enclave	Sm-Nd & Rb-Sr TDM	Whole Rock	1794			1794	Paleo-proterozoic	Eburnean Orogeny	Eburnean Orogeny	Fezaa et al., 2010
76	9.1569	24.6541		J11	Djanet batholith	Djanet	East Hoggar	Djanet	Xenolith	Sm-Nd & Rb-Sr TDM	Whole Rock	1582			1582	Meso-protezozoic	(1600-1200) Pre-Pan-African	Ante-Pan-African	Fezaa et al., 2010
77	9.1164	24.7183		TOD40	Djanet group sediments	Djanet	East Hoggar	Djanet	Djanet graoup sediments	Sm-Nd & Rb-Sr TDM	Whole Rock	1143			1143	Meso-protezozoic	(1600-1200) Pre-Pan-African	Ante-Pan-African	Fezaa et al., 2010
78	9.1164	24.7183		TOD41	Djanet group sediments	Djanet	East Hoggar	Djanet	Djanet graoup sediments	Sm-Nd & Rb-Sr TDM	Whole Rock	1334			1334	Meso-protezozoic	(1600-1200) Pre-Pan-African	Ante-Pan-African	Fezaa et al., 2010
79	9.1164	24.7183		TOD44	Djanet group sediments	Djanet	East Hoggar	Djanet	Djanet graoup sediments	Sm-Nd & Rb-Sr TDM	Whole Rock	1374			1374	Meso-protezozoic	(1600-1200) Pre-Pan-African	Ante-Pan-African	Fezaa et al., 2010
80	9.1164	24.7183		TOD45	Djanet group sediments	Djanet	East Hoggar	Djanet	Djanet graoup sediments	Sm-Nd & Rb-Sr TDM	Whole Rock	1189			1189	Meso-protezozoic	(1600-1200) Pre-Pan-African	Ante-Pan-African	Fezaa et al., 2010
81	9.49596	24.5357		TOD47	Djanet group sediments	Djanet	East Hoggar	Djanet	Djanet graoup sediments	Sm-Nd & Rb-Sr TDM	Whole Rock	1400			1400	Meso-protezozoic	(1600-1200) Pre-Pan-African	Ante-Pan-African	Fezaa et al., 2010
82	9.1164	24.7183		TOD43	Dykes	Djanet	East Hoggar	Djanet	Dyke	Sm-Nd & Rb-Sr TDM	Whole Rock	1675			1675	Paleo-proterozoic	Eburnean Orogeny	Eburnean Orogeny	Fezaa et al., 2010
83	9.49596	24.5357		TOD48	Dykes	Djanet	East Hoggar	Djanet	Dyke	Sm-Nd & Rb-Sr TDM	Whole Rock	N/D			N/D				Fezaa et al., 2010
84	9.79447	24.1698		TOD67	Edembo migmatite	Edembo	East Hoggar	Edembo	migmatite	Sm-Nd & Rb-Sr TDM	Whole Rock	1616			1616	Paleo-proterozoic	Eburnean Orogeny	Eburnean Orogeny	Fezaa et al., 2010
85	9.72782	24.3624		TOD74	Djanet batholith	Djanet	East Hoggar	Djanet	Monzogranite	U-Pb SHRIMP	Zircon	571	16		571±16	Neo-proterozoic	(650-570 Ma) Pan-African Orogeny	Pan-African Orogeny	Fezaa et al., 2010
86	9.72782	24.3624		TOD74	Djanet batholith	Djanet	East Hoggar	Djanet	Monzogranite	U-Pb SHRIMP	Zircon	562	3		562±3	Neo-proterozoic	(560-520 Ma) Pan-African Orogeny	Pan-African Orogeny	Fezaa et al., 2010
87	9.6793	24.4125		TOD56	Tin Bedjane pluton	Tin Bedjane	East Hoggar	Djanet	Syenogranite	U-Pb SHRIMP	Zircon	568	5		568±5	Neo-proterozoic	(650-570 Ma) Pan-African Orogeny	Pan-African Orogeny	Fezaa et al., 2010
88	9.6793	24.4125		TOD56	Tin Bedjane pluton	Tin Bedjane	East Hoggar	Djanet	Syenogranite	U-Pb SHRIMP	Zircon	898	17		898±17	Neo-proterozoic	(1100-870 Ma) Pan-African Rifting-Oceanization	Pan-African Oceanization	Fezaa et al., 2010
89	9.75063	24.3676		TOD59	Tin Amali dyke swarm	Tin Amali	East Hoggar	Djanet	Syenogranite	U-Pb SHRIMP	Zircon	558	6		558±6	Neo-proterozoic	(560-520 Ma) Pan-African Orogeny	Pan-African Orogeny	Fezaa et al., 2010
90	9.75063	24.3676		TOD59	Tin Amali dyke swarm	Tin Amali	East Hoggar	Djanet	Syenogranite	U-Pb SHRIMP	Zircon	566	5		566±5	Neo-proterozoic	(650-570 Ma) Pan-African Orogeny	Pan-African Orogeny	Fezaa et al., 2010
91	9.75063	24.3676		TOD59	Tin Amali dyke swarm	Tin Amali	East Hoggar	Djanet	Syenogranite	U-Pb SHRIMP	Zircon	570	6		570±6	Neo-proterozoic	(650-570 Ma) Pan-African Orogeny	Pan-African Orogeny	Fezaa et al., 2010
92	9.75063	24.3676		TOD59	Tin Amali dyke swarm	Tin Amali	East Hoggar	Djanet	Syenogranite	U-Pb SHRIMP	Zircon	628	9		628±9	Neo-proterozoic	(650-570 Ma) Pan-African Orogeny	Pan-African Orogeny	Fezaa et al., 2010
93	9.75063	24.3676		TOD59	Tin Amali dyke swarm	Tin Amali	East Hoggar	Djanet	Syenogranite	U-Pb SHRIMP	Zircon	732	13		732±13	Neo-proterozoic	(750-665 Ma) Pan-African Orogeny	Pan-African Orogeny	Fezaa et al., 2010
94	9.75063	24.3676		TOD59	Tin Amali dyke swarm	Tin Amali	East Hoggar	Djanet	Syenogranite	U-Pb SHRIMP	Zircon	865	24		865±24	Neo-proterozoic	(870-840 Ma) Pan-African Rifting	Pan-African Oceanization	Fezaa et al., 2010
95	9.75063	24.3676		TOD59	Tin Amali dyke swarm	Tin Amali	East Hoggar	Djanet	Syenogranite	U-Pb SHRIMP	Zircon	2091	40		2091±40	Paleo-proterozoic	Eburnean Orogeny	Eburnean Orogeny	Fezaa et al., 2010
96	9.79447	24.1698		TOD67	Edembo migmatite	Edembo	East Hoggar	Edembo	migmatite gneiss	U-Pb SHRIMP	Zircon	675	15		675±15	Neo-proterozoic	(750-665 Ma) Pan-African Orogeny	Pan-African Orogeny	Fezaa et al., 2010
97	9.79447	24.1698		TOD67	Edembo migmatite	Edembo	East Hoggar	Edembo	migmatite gneiss	U-Pb SHRIMP	Zircon	596	10		596±10	Neo-proterozoic	(650-570 Ma) Pan-African Orogeny	Pan-African Orogeny	Fezaa et al., 2010
98	9.79447	24.1698		TOD67	Edembo migmatite	Edembo	East Hoggar	Edembo	migmatite gneiss	U-Pb SHRIMP	Zircon	1831	16		1831±16	Paleo-proterozoic	Eburnean Orogeny	Eburnean Orogeny	Fezaa et al., 2010
99	9.79447	24.1698		TOD67	Edembo migmatite	Edembo	East Hoggar	Edembo	migmatite gneiss	U-Pb SHRIMP	Zircon	2940	17		2940±17	Archean	Ouzzalian Orogeny	Archean	Fezaa et al., 2010
100	9.7959	24.1828		TOD69	Edembo granite	Edembo	East Hoggar	Edembo	granite	U-Pb SHRIMP	Zircon	568	4		568±4	Neo-proterozoic	(650-570 Ma) Pan-African Orogeny	Pan-African Orogeny	Fezaa et al., 2010
101	9.7959	24.1828		TOD69	Edembo granite	Edembo	East Hoggar	Edembo	granite	U-Pb SHRIMP	Zircon	620	6		620±6	Neo-proterozoic	(650-570 Ma) Pan-African Orogeny	Pan-African Orogeny	Fezaa et al., 2010
102	9.7959	24.1828		TOD69	Edembo granite	Edembo	East Hoggar	Edembo	granite	U-Pb SHRIMP	Zircon	1863	73		1863±73	Paleo-proterozoic	Eburnean Orogeny	Eburnean Orogeny	Fezaa et al., 2010
103	8.21574	19.3086			Teggar	Teggar late-kinematic Dabaga-west pluton	Aïr	Assodé	monzogranite	Rb-Sr Isochron	Zircon	586	93		586±93	Neo-proterozoic	(650-570 Ma) Pan-African Orogeny	Pan-African Orogeny	Liégeois et al., 1994
104	8.50809	18.6748			Iferouane	Iferouane late-kinematic Dabaga-west batholith	Aïr	Assodé	monzogranite	Rb-Sr Isochron	Zircon	602	14		602±14	Neo-proterozoic	(650-570 Ma) Pan-African Orogeny	Pan-African Orogeny	Liégeois et al., 1994
105	8.81469	19.4969		BLN401	Emzeggar	late-kinematic Dabaga-east pluton	Aïr	Barghot	monzogranite	U-Pb	Zircon	714	19	18	714±19-18	Neo-proterozoic	(750-665 Ma) Pan-African Orogeny	Pan-African Orogeny	Liégeois et al., 1994
106	9.34947	17.5634		BLN34, BLN38, V36	Tchebarlare	Tchebarlare pluton	Aïr	Aouzegueur	post-kinematic monzogranite	U-Pb	Zircon	664	8		664±8	Neo-proterozoic	(750-665 Ma) Pan-African Orogeny	Pan-African Orogeny	Liégeois et al., 1994
107	8.13731	17.2981		BLN293	Dbaga Forest	Dabaga Forest late-kinematic Dabaga-west pluton	Aïr	Assodé	monzogranite	U-Pb	Zircon	643	11	10	643±11-10	Neo-proterozoic	(650-570 Ma) Pan-African Orogeny	Pan-African Orogeny	Liégeois et al., 1994
108	9.07614	17.3197		V67, V72, V73	Beurhot	Beurhot batholith	Aïr	Barghot	calc-alk, granitoids	Rb-Sr Isochron	Zircon	698	21		698±21	Neo-proterozoic	(750-665 Ma) Pan-African Orogeny	Pan-African Orogeny	Liégeois et al., 1994
109	9.26153	17.3514		BLN57, BLN58, BLN60, BLN61	Takarakoum	Takarakoum pluton	Aïr	Barghot	calc-alk, granitoids	Rb-Sr Isochron	Zircon	701	26		701±26	Neo-proterozoic	(750-665 Ma) Pan-African Orogeny	Pan-African Orogeny	Liégeois et al., 1994
110	9.55625	17.551			Eberjegui leuco-tonalite	Eberjegui granitoids	Aïr	Aouzegueur	granite	U-Pb	Zircon	660	7		660±7	Neo-proterozoic	(750-665 Ma) Pan-African Orogeny	Pan-African Orogeny	Liégeois et al., 1994
111	9.6846	17.4558			Rhyolites dykes	Proche-Ténéré	Aïr	Aouzegueur	late alkaline rhyolitic dykes	Rb-Sr Isochron	Zircon	529	11		529±11	Cambrian	(560-520 Ma) Pan-African Orogeny	Post Pan-African Orogeny	Liégeois et al., 1994
112	8.906	21.5017		BLN6, BLN15, BLN16	Algerian Eberjegui granodiorite	Eberjegui	Aïr	Barghot	Granodiorite-TTG	Sm-Nd	Whole Rock	729	8		729±8	Neo-proterozoic	(750-665 Ma) Pan-African Orogeny	Pan-African Orogeny	Liégeois et al., 1994
113	8.58929	19.501		BLN400	Raghane mylonitic gneiss	Raghane shear zone	Aïr	Assodé	Mylonitic tonalitic gneiss	U-Pb	Zircon	581	46	51	581±46-51	Neo-proterozoic	(650-570 Ma) Pan-African Orogeny	Pan-African Orogeny	Liégeois et al., 1994
114	8.26486	18.8241		BLN115	Azan gneiss (BLN115)	Azan gneiss pendant	Aïr	Assodé	gneiss	U-Pb	Zircon	600	25	30	600±25-30	Neo-proterozoic	(650-570 Ma) Pan-African Orogeny	Pan-African Orogeny	Liégeois et al., 1994
115	9.35225	17.3601		BLN55	Azan gneiss (BLN55)		Aïr	Barghot	gneiss-quartz dyke	U-Pb	Zircon	524	7		524±7	Cambrian	(560-520 Ma) Pan-African Orogeny	Post Pan-African Orogeny	Liégeois et al., 1994
116	8.01609	18.7423			Renatt anatectic granite	Iko	Aïr	Assodé	leucocratic granite	Rb-Sr Isochron	Zircon	666	11		666±11	Neo-proterozoic	(750-665 Ma) Pan-African Orogeny	Pan-African Orogeny	Liégeois et al., 1994
117	8.01609	18.7423			Renatt anatectic granite	Iko	Aïr	Assodé	leucocratic granite	Sm-Nd Isochron	Zircon	666	124		666±124	Neo-proterozoic	(750-665 Ma) Pan-African Orogeny	Pan-African Orogeny	Liégeois et al., 1994
118	5.22296	21.382		675-TB		Tin Begane	LATEA metacraton	Laouni	garnet amphibole	Sm-Nd	Whole Rock	685	20		685±20	Neo-proterozoic	(750-665 Ma) Pan-African Orogeny	Pan-African Orogeny	Liégeois et al., 2003
119	5.38339	21.6109		661-1		Tin Begane	LATEA metacraton	Laouni	garnet amphibole	Sm-Nd	Whole Rock	506	48		506±48	Cambrian	(520-480 Ma) Pan-African Orogeny	Post Pan-African Orogeny	Liégeois et al., 2003
120	5.38339	21.6109		648-2		Tin Begane	LATEA metacraton	Laouni	garnet gneiss	Sm-Nd	Whole Rock	531	38		531±38	Cambrian	(560-520 Ma) Pan-African Orogeny	Post Pan-African Orogeny	Liégeois et al., 2003
121	5.38339	21.6109		648-2		Tin Begane	LATEA metacraton	Laouni	garnet gneiss	Sm-Nd TDM	Whole Rock	1252			1252	Meso-protezozoic	(1600-1200) Pre-Pan-African	Ante-Pan-African	Liégeois et al., 2003
122	5.38339	21.6109		648-3 WR		Tin Begane	LATEA metacraton	Laouni	Garnet amphibole	Sm-Nd TDM	Whole Rock	1270			1270	Meso-protezozoic	(1600-1200) Pre-Pan-African	Ante-Pan-African	Liégeois et al., 2003
123	5.38339	21.6109		648-3		Tin Begane	LATEA metacraton	Laouni	Garnet amphibole	Sm-Nd	Whole Rock	529	66		529±66	Cambrian	(560-520 Ma) Pan-African Orogeny	Post Pan-African Orogeny	Liégeois et al., 2003
124	5.86469	21.6672		680-2b		Tin Begane	LATEA metacraton	Laouni	Eclogite	Sm-Nd	Whole Rock	683	60		683±60	Neo-proterozoic	(750-665 Ma) Pan-African Orogeny	Pan-African Orogeny	Liégeois et al., 2003
125	5.30714	22.3127				Iherane	LATEA metacraton	Laouni		Sm-Nd	Whole Rock	2075	30		2075±30	Paleo-proterozoic	Eburnean Orogeny	Eburnean Orogeny	Liégeois et al., 2003
126	5.37179	22.3127				Tin Amzi	LATEA metacraton	Laouni		Sm-Nd	Whole Rock	615	15	20	615±15-20	Neo-proterozoic	(650-570 Ma) Pan-African Orogeny	Pan-African Orogeny	Liégeois et al., 2003
127	5.77299	22.3778				Anfeg	LATEA metacraton	Laouni		Sm-Nd	Whole Rock	615	5		615±5	Neo-proterozoic	(650-570 Ma) Pan-African Orogeny	Pan-African Orogeny	Liégeois et al., 2003
128	5.02288	22.0049				Tinef	LATEA metacraton	Laouni		Sm-Nd	Whole Rock	604	6	10	604±6-10	Neo-proterozoic	(650-570 Ma) Pan-African Orogeny	Pan-African Orogeny	Liégeois et al., 2003
129	8.01609	18.7423			Renatt	Iko	Aïr	Assodé	Leucocratic granite	Sm-Nd TDM	Whole Rock	2200			2200	Paleo-proterozoic	Eburnean Orogeny	Eburnean Orogeny	Liégeois et al., 2003
130	8.01609	18.7423			Renatt	Iko	Aïr	Assodé	Leucocratic granite	Sm-Nd TDM	Whole Rock	3200			3200	Archean	Ouzzalian Orogeny	Archean	Liégeois et al., 2003
131	7.14249	25.0299		2273	Red Gneiss complex, type 2	Gour Oumelalen	LATEA metacraton	Egéré-Aleskod	grey gneisses	Sm-Nd TDM	Whole Rock	2620			2620	Archean	Liberian Orogeny	Archean	Peucat et al., 2003
132	7.16091	25.0514		673	GO supergroup	Gour Oumelalen	LATEA metacraton	Egéré-Aleskod	garnet-bearing grey gneisses	Sm-Nd TDM	Whole Rock	2550			2550	Archean	Liberian Orogeny	Archean	Peucat et al., 2003
133	7.16091	25.0827		730	GO supergroup	Gour Oumelalen	LATEA metacraton	Egéré-Aleskod	Pegmatites	Sm-Nd TDM	Whole Rock	2580			2580	Archean	Liberian Orogeny	Archean	Peucat et al., 2003
134	7.16091	25.0827		731	GO supergroup	Gour Oumelalen	LATEA metacraton	Egéré-Aleskod	Massive felsic charnockites	Sm-Nd TDM	Whole Rock	2590			2590	Archean	Liberian Orogeny	Archean	Peucat et al., 2003
135	7.16982	25.0746		734	GO supergroup	Gour Oumelalen	LATEA metacraton	Egéré-Aleskod	Massive felsic charnockites	Sm-Nd TDM	Whole Rock	3100			3100	Archean	Ouzzalian Orogeny	Archean	Peucat et al., 2003
136	7.16982	25.0746		735	GO supergroup	Gour Oumelalen	LATEA metacraton	Egéré-Aleskod	Massive felsic charnockites	Sm-Nd TDM	Whole Rock	3380			3380	Archean	Ouzzalian Orogeny	Archean	Peucat et al., 2003
137	7.24113	25.0251		677	Red Gneiss complex, type 1	Gour Oumelalen	LATEA metacraton	Egéré-Aleskod	red and black augen gneisses	Sm-Nd TDM	Whole Rock	3200			3200	Archean	Ouzzalian Orogeny	Archean	Peucat et al., 2003
138	7.24113	25.0251		677	Red Gneiss complex, type 1	Gour Oumelalen	LATEA metacraton	Egéré-Aleskod	red and black augen gneisses	Sm-Nd TDM	Whole Rock	3060			3060	Archean	Ouzzalian Orogeny	Archean	Peucat et al., 2003
139	7.24113	25.0251		677	Red Gneiss complex, type 1	Gour Oumelalen	LATEA metacraton	Egéré-Aleskod	red and black augen gneisses	Sm-Nd TDM	Whole Rock	3400			3400	Archean	Ouzzalian Orogeny	Archean	Peucat et al., 2003
140	7.29639	25.0477		665	Red Gneiss complex, type 2	Gour Oumelalen	LATEA metacraton	Egéré-Aleskod	mylonitic	Sm-Nd TDM	Whole Rock	2850			2850	Archean	Ouzzalian Orogeny	Archean	Peucat et al., 2003
141	7.28985	25.0525		2272	Red Gneiss complex, type 2	Gour Oumelalen	LATEA metacraton	Egéré-Aleskod	red and black augen gneisses	Sm-Nd TDM	Whole Rock	1970			1970	Paleo-proterozoic	Eburnean Orogeny	Eburnean Orogeny	Peucat et al., 2003
142	7.2744	25.0762		2271	Red Gneiss complex, type 2	Gour Oumelalen	LATEA metacraton	Egéré-Aleskod	red and black augen gneisses	Sm-Nd TDM	Whole Rock	2720			2720	Archean	Ouzzalian Orogeny	Archean	Peucat et al., 2003
143	7.28034	25.0827		2270	Red Gneiss complex, type 1	Gour Oumelalen	LATEA metacraton	Egéré-Aleskod	red and black augen gneisses	Sm-Nd TDM	Whole Rock	3220			3220	Archean	Ouzzalian Orogeny	Archean	Peucat et al., 2003
144	7.28034	25.0827		2270	Red Gneiss complex, type 1	Gour Oumelalen	LATEA metacraton	Egéré-Aleskod	red and black augen gneisses	Sm-Nd TDM	Whole Rock	3060			3060	Archean	Ouzzalian Orogeny	Archean	Peucat et al., 2003
145	7.28034	25.0827		2270	Red Gneiss complex, type 1	Gour Oumelalen	LATEA metacraton	Egéré-Aleskod	red and black augen gneisses	Sm-Nd TDM	Whole Rock	3400			3400	Archean	Ouzzalian Orogeny	Archean	Peucat et al., 2003
146	7.27737	25.0902		2268	Red Gneiss complex, type 1	Gour Oumelalen	LATEA metacraton	Egéré-Aleskod	red and black augen gneisses	Sm-Nd TDM	Whole Rock	3180			3180	Archean	Ouzzalian Orogeny	Archean	Peucat et al., 2003
147	7.27737	25.0902		2268	Red Gneiss complex, type 1	Gour Oumelalen	LATEA metacraton	Egéré-Aleskod	red and black augen gneisses	Sm-Nd TDM	Whole Rock	3040			3040	Archean	Ouzzalian Orogeny	Archean	Peucat et al., 2003
148	7.27737	25.0902		2268	Red Gneiss complex, type 1	Gour Oumelalen	LATEA metacraton	Egéré-Aleskod	red and black augen gneisses	Sm-Nd TDM	Whole Rock	3300			3300	Archean	Ouzzalian Orogeny	Archean	Peucat et al., 2003
149	7.28049	25.0866		2269	Red Gneiss complex, type 2	Gour Oumelalen	LATEA metacraton	Egéré-Aleskod	grey gneisses	Sm-Nd TDM	Whole Rock	1930			1930	Paleo-proterozoic	Eburnean Orogeny	Eburnean Orogeny	Peucat et al., 2003
150	7.27611	25.0998		654	Red Gneiss complex, type 2	Gour Oumelalen	LATEA metacraton	Egéré-Aleskod	grey gneisses	Sm-Nd TDM	Whole Rock	2920			2920	Archean	Ouzzalian Orogeny	Archean	Peucat et al., 2003
151	7.27763	25.1053		658	Red Gneiss complex, type 1	Gour Oumelalen	LATEA metacraton	Egéré-Aleskod	grey gneisses	Sm-Nd TDM	Whole Rock	3310			3310	Archean	Ouzzalian Orogeny	Archean	Peucat et al., 2003
152	7.27763	25.1053		658	Red Gneiss complex, type 1	Gour Oumelalen	LATEA metacraton	Egéré-Aleskod	grey gneisses	Sm-Nd TDM	Whole Rock	3160			3160	Archean	Ouzzalian Orogeny	Archean	Peucat et al., 2003
153	7.27763	25.1053		658	Red Gneiss complex, type 1	Gour Oumelalen	LATEA metacraton	Egéré-Aleskod	grey gneisses	Sm-Nd TDM	Whole Rock	3500			3500	Archean	Ouzzalian Orogeny	Archean	Peucat et al., 2003
154	7.27549	25.1107		659	Red Gneiss complex, type 1	Gour Oumelalen	LATEA metacraton	Egéré-Aleskod	grey gneisses	Sm-Nd TDM	Whole Rock	3320			3320	Archean	Ouzzalian Orogeny	Archean	Peucat et al., 2003
155	7.27549	25.1107		659	Red Gneiss complex, type 1	Gour Oumelalen	LATEA metacraton	Egéré-Aleskod	grey gneisses	Sm-Nd TDM	Whole Rock	3170			3170	Archean	Ouzzalian Orogeny	Archean	Peucat et al., 2003
156	7.27549	25.1107		659	Red Gneiss complex, type 1	Gour Oumelalen	LATEA metacraton	Egéré-Aleskod	grey gneisses	Sm-Nd TDM	Whole Rock	3500			3500	Archean	Ouzzalian Orogeny	Archean	Peucat et al., 2003
157	7.4124	25.0827		2267	Red Gneiss complex, type 2	Gour Oumelalen	LATEA metacraton	Egéré-Aleskod	red and black augen gneisses	Sm-Nd TDM	Whole Rock	2850			2850	Archean	Ouzzalian Orogeny	Archean	Peucat et al., 2003
158	7.16982	25.0746			GO supergroup	Gour Oumelalen	LATEA metacraton	Egéré-Aleskod	Charnockite	Rb-Sr Isochron	Zircon	1929	47		1929±47	Paleo-proterozoic	Eburnean Orogeny	Eburnean Orogeny	Latouche, 1978
159	7.16982	25.0746			GO supergroup	Gour Oumelalen	LATEA metacraton	Egéré-Aleskod	granulitic leptynites	Rb-Sr Isochron	Zircon	1952	28		1952±28	Paleo-proterozoic	Eburnean Orogeny	Eburnean Orogeny	Latouche, 1978
160	7.27549	25.1107		659	Red Gneiss complex, type 1	Gour Oumelalen	LATEA metacraton	Egéré-Aleskod	grey gneisses	U-Pb TIMS	Zircon	2647	18		2647±18	Archean	Liberian Orogeny	Archean	Peucat et al., 2003
161	7.24113	25.0251		677	Red Gneiss complex, type 1	Gour Oumelalen	LATEA metacraton	Egéré-Aleskod	red and black augen gneisses	U-Pb 1270-SIMS CAMECA	Zircon	2696	21		2696±21	Archean	Liberian Orogeny	Archean	Peucat et al., 2003
162	7.16091	25.0514		673	GO supergroup	Gour Oumelalen	LATEA metacraton	Egéré-Aleskod	garnet-bearing grey gneisses	U-Pb TIMS	Zircon	2183	3		2183±3	Paleo-proterozoic	Eburnean Orogeny	Eburnean Orogeny	Peucat et al., 2003
163	7.16091	25.0514		673	GO supergroup	Gour Oumelalen	LATEA metacraton	Egéré-Aleskod	garnet-bearing grey gneisses	U-Pb 1270-SIMS CAMECA	Zircon	2190	5		2190±5	Paleo-proterozoic	Eburnean Orogeny	Eburnean Orogeny	Peucat et al., 2003
164	7.16091	25.0514		673	GO supergroup	Gour Oumelalen	LATEA metacraton	Egéré-Aleskod	garnet-bearing grey gneisses	U-Pb 1270-SIMS CAMECA	Zircon	2190	25		2190±25	Paleo-proterozoic	Eburnean Orogeny	Eburnean Orogeny	Peucat et al., 2003
165	7.4124	25.0827		2267	Red Gneiss complex, type 2	Gour Oumelalen	LATEA metacraton	Egéré-Aleskod	red and black augen gneisses	U-Pb TIMS	Zircon	1893	52		1893±52	Paleo-proterozoic	Eburnean Orogeny	Eburnean Orogeny	Peucat et al., 2003
166	7.2744	25.0762		2271	Red Gneiss complex, type 2	Gour Oumelalen	LATEA metacraton	Egéré-Aleskod	red and black augen gneisses	U-Pb TIMS	Zircon	1903	15		1903±15	Paleo-proterozoic	Eburnean Orogeny	Eburnean Orogeny	Peucat et al., 2003
167	7.2744	25.0762		2271	Red Gneiss complex, type 2	Gour Oumelalen	LATEA metacraton	Egéré-Aleskod	red and black augen gneisses	U-Pb TIMS	Zircon	1899	8		1899±8	Paleo-proterozoic	Eburnean Orogeny	Eburnean Orogeny	Peucat et al., 2003
168	7.27549	25.1107		659	Red Gneiss complex, type 1	Gour Oumelalen	LATEA metacraton	Egéré-Aleskod	grey gneisses	207Pb-206Pb TIMS	Zircon	2632	3		2632±3	Archean	Liberian Orogeny	Archean	Peucat et al., 2003
169	7.27549	25.1107		659	Red Gneiss complex, type 1	Gour Oumelalen	LATEA metacraton	Egéré-Aleskod	grey gneisses	207Pb-206Pb TIMS	Zircon	2659	4		2659±4	Archean	Liberian Orogeny	Archean	Peucat et al., 2003
170	7.24113	25.0251		677	Red Gneiss complex, type 1	Gour Oumelalen	LATEA metacraton	Egéré-Aleskod	red and black augen gneisses	207Pb-206Pb TIMS	Zircon	2506	2		2506±2	Archean	Liberian Orogeny	Archean	Peucat et al., 2003
171	7.24113	25.0251		677	Red Gneiss complex, type 1	Gour Oumelalen	LATEA metacraton	Egéré-Aleskod	red and black augen gneisses	207Pb-206Pb TIMS	Zircon	2664	1		2664±1	Archean	Liberian Orogeny	Archean	Peucat et al., 2003
172	7.28034	25.0827		2270	Red Gneiss complex, type 1	Gour Oumelalen	LATEA metacraton	Egéré-Aleskod	red and black augen gneisses	207Pb-206Pb TIMS	Zircon	2745	82		2745±82	Archean	Ouzzalian Orogeny	Archean	Peucat et al., 2003
173	7.28034	25.0827		2270	Red Gneiss complex, type 1	Gour Oumelalen	LATEA metacraton	Egéré-Aleskod	red and black augen gneisses	207Pb-206Pb TIMS	Zircon	2614	9		2614±9	Archean	Liberian Orogeny	Archean	Peucat et al., 2003
174	7.27611	25.0998		654	Red Gneiss complex, type 2	Gour Oumelalen	LATEA metacraton	Egéré-Aleskod	grey gneisses	207Pb-206Pb TIMS	Zircon	1930	3		1930±3	Paleo-proterozoic	Eburnean Orogeny	Eburnean Orogeny	Peucat et al., 2003
175	7.27611	25.0998		654	Red Gneiss complex, type 2	Gour Oumelalen	LATEA metacraton	Egéré-Aleskod	grey gneisses	207Pb-206Pb TIMS	Zircon	2535	4		2535±4	Archean	Liberian Orogeny	Archean	Peucat et al., 2003
176	7.29639	25.0477		665	Red Gneiss complex, type 2	Gour Oumelalen	LATEA metacraton	Egéré-Aleskod	mylonitic	207Pb-206Pb TIMS	Zircon	1839	7		1839±7	Paleo-proterozoic	Eburnean Orogeny	Eburnean Orogeny	Peucat et al., 2003
177	7.29639	25.0477		665	Red Gneiss complex, type 2	Gour Oumelalen	LATEA metacraton	Egéré-Aleskod	mylonitic	207Pb-206Pb TIMS	Zircon	1878	3		1878±3	Paleo-proterozoic	Eburnean Orogeny	Eburnean Orogeny	Peucat et al., 2003
178	7.2744	25.0762		2271	Red Gneiss complex, type 2	Gour Oumelalen	LATEA metacraton	Egéré-Aleskod	red and black augen gneisses	207Pb-206Pb TIMS	Zircon	1861	11		1861±11	Paleo-proterozoic	Eburnean Orogeny	Eburnean Orogeny	Peucat et al., 2003
179	7.2744	25.0762		2271	Red Gneiss complex, type 2	Gour Oumelalen	LATEA metacraton	Egéré-Aleskod	red and black augen gneisses	207Pb-206Pb TIMS	Zircon	1911	5		1911±5	Paleo-proterozoic	Eburnean Orogeny	Eburnean Orogeny	Peucat et al., 2003
180	7.16091	25.0514		673	GO supergroup	Gour Oumelalen	LATEA metacraton	Egéré-Aleskod	garnet-bearing grey gneisses	207Pb-206Pb TIMS	Zircon	2227	10		2227±10	Paleo-proterozoic	Eburnean Orogeny	Eburnean Orogeny	Peucat et al., 2003
181	7.16982	25.0746		734	GO supergroup	Gour Oumelalen	LATEA metacraton	Egéré-Aleskod	Massive felsic charnockites	207Pb-206Pb TIMS	Zircon	2136	8		2136±8	Paleo-proterozoic	Eburnean Orogeny	Eburnean Orogeny	Peucat et al., 2003
182	7.16982	25.0746		734	GO supergroup	Gour Oumelalen	LATEA metacraton	Egéré-Aleskod	Massive felsic charnockites	207Pb-206Pb TIMS	Zircon	2323	2		2323±2	Paleo-proterozoic	Eburnean Orogeny	Eburnean Orogeny	Peucat et al., 2003
183	7.16091	25.0827		731	GO supergroup	Gour Oumelalen	LATEA metacraton	Egéré-Aleskod	Massive felsic charnockites	207Pb-206Pb TIMS	Zircon	1958	3		1958±3	Paleo-proterozoic	Eburnean Orogeny	Eburnean Orogeny	Peucat et al., 2003
184	7.16982	25.0746		735	GO supergroup	Gour Oumelalen	LATEA metacraton	Egéré-Aleskod	Massive felsic charnockites	207Pb-206Pb TIMS	Zircon	1992	3		1992±3	Paleo-proterozoic	Eburnean Orogeny	Eburnean Orogeny	Peucat et al., 2003
185	7.16091	25.0827		730	GO supergroup	Gour Oumelalen	LATEA metacraton	Egéré-Aleskod	Pegmatites	207Pb-206Pb TIMS	Zircon	1967	25		1967±25	Paleo-proterozoic	Eburnean Orogeny	Eburnean Orogeny	Peucat et al., 2003
186	7.16091	25.0827		730	GO supergroup	Gour Oumelalen	LATEA metacraton	Egéré-Aleskod	Pegmatites	207Pb-206Pb TIMS	Zircon	1885	3		1885±3	Paleo-proterozoic	Eburnean Orogeny	Eburnean Orogeny	Peucat et al., 2003
187	-6.04135	26.2788		IG3	2.07 Ga Eglab volcanics		WAC	Yetti-Eglab	Rhyolite	Sm-Nd & Rb-Sr TDM	Whole Rock	2290			2290	Paleo-proterozoic	Eburnean Orogeny	Eburnean Orogeny	Peucat et al., 2005
188	-5.96006	25.8214		GH7-1	2.09 Ga syn-tectonic Chegga trondhjemite		WAC	Yetti-Eglab	Micro quartzdiorite enclave	Sm-Nd & Rb-Sr TDM	Whole Rock	2290			2290	Paleo-proterozoic	Eburnean Orogeny	Eburnean Orogeny	Peucat et al., 2005
189	-5.96006	25.8214		GH7, grain 1	2.09 Ga syn-tectonic Chegga trondhjemite		WAC	Yetti-Eglab	Trondhjemite	U-Pb TIMS	Zircon	2098	16		2098±16	Paleo-proterozoic	Eburnean Orogeny	Eburnean Orogeny	Peucat et al., 2005
190	-5.96006	25.8214		GH7, grain 2	2.09 Ga syn-tectonic Chegga trondhjemite		WAC	Yetti-Eglab	Trondhjemite	U-Pb TIMS	Zircon	2095	10		2095±10	Paleo-proterozoic	Eburnean Orogeny	Eburnean Orogeny	Peucat et al., 2005
191	-5.96006	25.8214		GH7	2.09 Ga syn-tectonic Chegga trondhjemite		WAC	Yetti-Eglab	Trondhjemite	U-Pb 1270-SIMS CAMECA	Zircon	2094	2		2094±2	Paleo-proterozoic	Eburnean Orogeny	Eburnean Orogeny	Peucat et al., 2005
192	-5.96006	25.8214		GH7	2.09 Ga syn-tectonic Chegga trondhjemite		WAC	Yetti-Eglab	Trondhjemite	Sm-Nd & Rb-Sr TDM	Whole Rock	2240			2240	Paleo-proterozoic	Eburnean Orogeny	Eburnean Orogeny	Peucat et al., 2005
193	-5.96006	25.8214		GH3, grain 1	2.09 Ga syn-tectonic Chegga trondhjemite		WAC	Yetti-Eglab	Trondhjemite	U-Pb TIMS	Zircon	2078	3		2078±3	Paleo-proterozoic	Eburnean Orogeny	Eburnean Orogeny	Peucat et al., 2005
194	-5.96006	25.8214		GH3, grains 2	2.09 Ga syn-tectonic Chegga trondhjemite		WAC	Yetti-Eglab	Trondhjemite	U-Pb TIMS	Zircon	2091	3		2091±3	Paleo-proterozoic	Eburnean Orogeny	Eburnean Orogeny	Peucat et al., 2005
195	-5.96006	25.8214		GH3	2.09 Ga syn-tectonic Chegga trondhjemite		WAC	Yetti-Eglab	Trondhjemite	Sm-Nd & Rb-Sr TDM	Whole Rock	2260			2260	Paleo-proterozoic	Eburnean Orogeny	Eburnean Orogeny	Peucat et al., 2005
196	-5.94723	25.8535		GH10	2.7Ga ophiolitic Chegga series		WAC	Yetti-Eglab	Trondhjemitic gneiss	U-Pb TIMS	Zircon	2728	4		2728±4	Archean	Ouzzalian Orogeny	Archean	Peucat et al., 2005
197	-5.94723	25.8535		GH10	2.7Ga ophiolitic Chegga series		WAC	Yetti-Eglab	Trondhjemitic gneiss	Sm-Nd & Rb-Sr TDM	Whole Rock	2860			2860	Archean	Ouzzalian Orogeny	Archean	Peucat et al., 2005
198	-5.94723	25.8535		GH23	2.7Ga ophiolitic Chegga series		WAC	Yetti-Eglab	Tonalitic gneiss	Sm-Nd & Rb-Sr TDM	Whole Rock	2800			2800	Archean	Ouzzalian Orogeny	Archean	Peucat et al., 2005
199	-5.94723	25.8535		GH24	2.7Ga ophiolitic Chegga series		WAC	Yetti-Eglab	Tonalitic gneiss	Sm-Nd & Rb-Sr TDM	Whole Rock	2590			2590	Archean	Liberian Orogeny	Archean	Peucat et al., 2005
200	-5.88305	25.8663		GH27	2.07 Ga post-tectonic Aftout granitoides		WAC	Yetti-Eglab	Quartz-diorite (medium-K)	Sm-Nd & Rb-Sr TDM	Whole Rock	2280			2280	Paleo-proterozoic	Eburnean Orogeny	Eburnean Orogeny	Peucat et al., 2005
201	-5.88305	25.8663		GH35	2.07 Ga post-tectonic Aftout granitoides		WAC	Yetti-Eglab	Quartz-diorite (medium-K)	Sm-Nd & Rb-Sr TDM	Whole Rock	2260			2260	Paleo-proterozoic	Eburnean Orogeny	Eburnean Orogeny	Peucat et al., 2005
202	-5.23989	25.9254		CHIN16	2.07 Ga Eglab volcanics		WAC	Yetti-Eglab	Dacite	Sm-Nd & Rb-Sr TDM	Whole Rock	2310			2310	Paleo-proterozoic	Eburnean Orogeny	Eburnean Orogeny	Peucat et al., 2005
203	-5.06734	25.9587		CHIN2, grain 1	2.07 Ga post-tectonic Aftout granitoides		WAC	Yetti-Eglab	Monzogranite (high-K)	U-Pb TIMS	Zircon	2063	3		2063±3	Paleo-proterozoic	Eburnean Orogeny	Eburnean Orogeny	Peucat et al., 2005
204	-5.06734	25.9587		CHIN2, grains 2	2.07 Ga post-tectonic Aftout granitoides		WAC	Yetti-Eglab	Monzogranite (high-K)	U-Pb TIMS	Zircon	2065	1		2065±1	Paleo-proterozoic	Eburnean Orogeny	Eburnean Orogeny	Peucat et al., 2005
205	-5.06734	25.9587		CHIN2	2.07 Ga post-tectonic Aftout granitoides		WAC	Yetti-Eglab	Monzogranite (high-K)	Sm-Nd & Rb-Sr TDM	Whole Rock	2290			2290	Paleo-proterozoic	Eburnean Orogeny	Eburnean Orogeny	Peucat et al., 2005
206	-4.22452	25.6326		HS1 grains 2	2.2Ga gabbroids of the Teggeur Group		WAC	Yetti-Eglab	Leuco-gabbro	U-Pb TIMS	Zircon	2202	7		2202±7	Paleo-proterozoic	Eburnean Orogeny	Eburnean Orogeny	Peucat et al., 2005
207	-4.22452	25.6326		HS1 grain 1	2.2Ga gabbroids of the Teggeur Group		WAC	Yetti-Eglab	Leuco-gabbro	U-Pb TIMS	Zircon	2196	5		2196±5	Paleo-proterozoic	Eburnean Orogeny	Eburnean Orogeny	Peucat et al., 2005
208	-4.22452	25.6326		HS1	2.2Ga gabbroids of the Teggeur Group		WAC	Yetti-Eglab	Leuco-gabbro	Sm-Nd & Rb-Sr TDM	Whole Rock	2420			2420	Paleo-proterozoic	Eburnean Orogeny	Eburnean Orogeny	Peucat et al., 2005
209	-4.22452	25.6326		HS2 grain 1	2.2Ga gabbroids of the Teggeur Group		WAC	Yetti-Eglab	Anorthosite	U-Pb TIMS	Zircon	2199	3		2199±3	Paleo-proterozoic	Eburnean Orogeny	Eburnean Orogeny	Peucat et al., 2005
210	-4.22452	25.6326		HS2	2.2Ga gabbroids of the Teggeur Group		WAC	Yetti-Eglab	Anorthosite	Sm-Nd & Rb-Sr TDM	Whole Rock	2420			2420	Paleo-proterozoic	Eburnean Orogeny	Eburnean Orogeny	Peucat et al., 2005
211	-4.22452	25.6326		HS3	2.2Ga gabbroids of the Teggeur Group		WAC	Yetti-Eglab	Gabbro	Sm-Nd & Rb-Sr TDM	Whole Rock	2520			2520	Archean	Liberian Orogeny	Archean	Peucat et al., 2005
212	-3.81239	25.9484		CH1 grain2	2.2Ga gabbroids of the Teggeur Group		WAC	Yetti-Eglab	Quartz gabbrodiorite	U-Pb TIMS	Zircon	2195	4		2195±4	Paleo-proterozoic	Eburnean Orogeny	Eburnean Orogeny	Peucat et al., 2005
213	-3.81239	25.9484		CH1 grain1	2.2Ga gabbroids of the Teggeur Group		WAC	Yetti-Eglab	Quartz gabbrodiorite	U-Pb TIMS	Zircon	2207	10		2207±10	Paleo-proterozoic	Eburnean Orogeny	Eburnean Orogeny	Peucat et al., 2005
214	-3.81239	25.9484		CH1	2.2Ga gabbroids of the Teggeur Group		WAC	Yetti-Eglab	Quartz gabbrodiorite	U-Pb 1270-SIMS CAMECA	Zircon	2192	8		2192±8	Paleo-proterozoic	Eburnean Orogeny	Eburnean Orogeny	Peucat et al., 2005
215	-3.81239	25.9484		CH1	2.2Ga gabbroids of the Teggeur Group		WAC	Yetti-Eglab	Quartz gabbrodiorite	Sm-Nd & Rb-Sr TDM	Whole Rock	2500			2500	Archean	Liberian Orogeny	Archean	Peucat et al., 2005
216	-3.41594	25.702		TOH1 (a)	2.2Ga orthogneisses of the Tilemsi and Teggeur groups		WAC	Yetti-Eglab	Quartzdioritic gneiss	Sm-Nd & Rb-Sr TDM	Whole Rock	2270			2270	Paleo-proterozoic	Eburnean Orogeny	Eburnean Orogeny	Peucat et al., 2005
217	-3.41594	25.702		TOH1-b grain 1	2.2Ga orthogneisses of the Tilemsi and Teggeur groups		WAC	Yetti-Eglab	Trondhjemitic gneiss	U-Pb TIMS	Zircon	2171	4		2171±4	Paleo-proterozoic	Eburnean Orogeny	Eburnean Orogeny	Peucat et al., 2005
218	-3.41594	25.702		TOH1-b, grains 2	2.2Ga orthogneisses of the Tilemsi and Teggeur groups		WAC	Yetti-Eglab	Trondhjemitic gneiss	U-Pb TIMS	Zircon	2170	1		2170±1	Paleo-proterozoic	Eburnean Orogeny	Eburnean Orogeny	Peucat et al., 2005
219	-3.41594	25.702		TOH1 (b)	2.2Ga orthogneisses of the Tilemsi and Teggeur groups		WAC	Yetti-Eglab	Trondhjemitic gneiss	Sm-Nd & Rb-Sr TDM	Whole Rock	2330			2330	Paleo-proterozoic	Eburnean Orogeny	Eburnean Orogeny	Peucat et al., 2005
220	-3.41594	25.702		TOH6, grains 2	2.2Ga orthogneisses of the Tilemsi and Teggeur groups		WAC	Yetti-Eglab	Granodioritic gneiss	U-Pb TIMS	Zircon	2194	7		2194±7	Paleo-proterozoic	Eburnean Orogeny	Eburnean Orogeny	Peucat et al., 2005
221	-3.41594	25.702		TOH6	2.2Ga orthogneisses of the Tilemsi and Teggeur groups		WAC	Yetti-Eglab	Granodioritic gneiss	Sm-Nd & Rb-Sr TDM	Whole Rock	2350			2350	Paleo-proterozoic	Eburnean Orogeny	Eburnean Orogeny	Peucat et al., 2005
222	-3.0694	25.9318		BAL3 garins 1	2.2Ga orthogneisses of the Tilemsi and Teggeur groups		WAC	Yetti-Eglab	Quartz-diorite gneiss	U-Pb TIMS	Zircon	2220	6		2220±6	Paleo-proterozoic	Eburnean Orogeny	Eburnean Orogeny	Peucat et al., 2005
223	-3.0694	25.9318		BAL3 grains 2	2.2Ga orthogneisses of the Tilemsi and Teggeur groups		WAC	Yetti-Eglab	Quartz-diorite gneiss	U-Pb TIMS	Zircon	2160	12		2160±12	Paleo-proterozoic	Eburnean Orogeny	Eburnean Orogeny	Peucat et al., 2005
224	-3.0694	25.9318		BAL3	2.2Ga orthogneisses of the Tilemsi and Teggeur groups		WAC	Yetti-Eglab	Quartz-diorite gneiss	Sm-Nd & Rb-Sr TDM	Whole Rock	2500			2500	Archean	Liberian Orogeny	Archean	Peucat et al., 2005
225	-3.0694	25.9318		BAL5	2.2Ga orthogneisses of the Tilemsi and Teggeur groups		WAC	Yetti-Eglab	Monzogranitic gneiss	Sm-Nd & Rb-Sr TDM	Whole Rock	2290			2290	Paleo-proterozoic	Eburnean Orogeny	Eburnean Orogeny	Peucat et al., 2005
226	-3.19727	26.2745		DEG6, grain1	2.07 Ga post-tectonic Aftout granitoides		WAC	Yetti-Eglab	Gabbro (high-K)	U-Pb TIMS	Zircon	2073	1		2073±1	Paleo-proterozoic	Eburnean Orogeny	Eburnean Orogeny	Peucat et al., 2005
227	-3.19727	26.2745		DEG6, grain 2	2.07 Ga post-tectonic Aftout granitoides		WAC	Yetti-Eglab	Gabbro (high-K)	U-Pb TIMS	Zircon	2075	1		2075±1	Paleo-proterozoic	Eburnean Orogeny	Eburnean Orogeny	Peucat et al., 2005
228	-3.19727	26.2745		DEG6	2.07 Ga post-tectonic Aftout granitoides		WAC	Yetti-Eglab	Gabbro (high-K)	U-Pb 1270-SIMS CAMECA	Zircon	2068	3		2068±3	Paleo-proterozoic	Eburnean Orogeny	Eburnean Orogeny	Peucat et al., 2005
229	-3.19727	26.2745		DEG6	2.07 Ga post-tectonic Aftout granitoides		WAC	Yetti-Eglab	Gabbro (high-K)	Sm-Nd & Rb-Sr TDM	Whole Rock	2380			2380	Paleo-proterozoic	Eburnean Orogeny	Eburnean Orogeny	Peucat et al., 2005
230	-3.26002	26.2677		DEG8, grains 1	2.07 Ga post-tectonic Aftout granitoides		WAC	Yetti-Eglab	Gabbro (high-K)	U-Pb TIMS	Zircon	2077	6		2077±6	Paleo-proterozoic	Eburnean Orogeny	Eburnean Orogeny	Peucat et al., 2005
231	-3.26002	26.2677		DEG 8, grains 2	2.07 Ga post-tectonic Aftout granitoides		WAC	Yetti-Eglab	Gabbro (high-K)	U-Pb TIMS	Zircon	2071	4		2071±4	Paleo-proterozoic	Eburnean Orogeny	Eburnean Orogeny	Peucat et al., 2005
232	-3.26002	26.2677		DEG8	2.07 Ga post-tectonic Aftout granitoides		WAC	Yetti-Eglab	Gabbro (high-K)	Sm-Nd & Rb-Sr TDM	Whole Rock	2380			2380	Paleo-proterozoic	Eburnean Orogeny	Eburnean Orogeny	Peucat et al., 2005
233	-3.79623	26.2421		E32, grain 1	2.2Ga orthogneisses of the Tilemsi and Teggeur groups		WAC	Yetti-Eglab	Monzogranitic gneiss	U-Pb TIMS	Zircon	2179	13		2179±13	Paleo-proterozoic	Eburnean Orogeny	Eburnean Orogeny	Peucat et al., 2005
234	-3.79623	26.2421		E32, grains 2	2.2Ga orthogneisses of the Tilemsi and Teggeur groups		WAC	Yetti-Eglab	Monzogranitic gneiss	U-Pb TIMS	Zircon	2182	1		2182±1	Paleo-proterozoic	Eburnean Orogeny	Eburnean Orogeny	Peucat et al., 2005
235	-3.79623	26.2421		E32	2.2Ga orthogneisses of the Tilemsi and Teggeur groups		WAC	Yetti-Eglab	Monzogranitic gneiss	Sm-Nd & Rb-Sr TDM	Whole Rock	2340			2340±	Paleo-proterozoic	Eburnean Orogeny	Eburnean Orogeny	Peucat et al., 2005
236	-3.492	27.2068		TL4	2.07 Ga post-tectonic Aftout granitoides		WAC	Yetti-Eglab	Gabbro (high-K)	Sm-Nd & Rb-Sr TDM	Whole Rock	2500			2500	Archean	Liberian Orogeny	Archean	Peucat et al., 2005
237	-5.91062	26.8036		GR1, grain 1	2.07 Ga post-tectonic Aftout granitoides		WAC	Yetti-Eglab	Quartz-diorite (medium-K)	U-Pb TIMS	Zircon	2056	3		2056±3	Paleo-proterozoic	Eburnean Orogeny	Eburnean Orogeny	Peucat et al., 2005
238	-5.91062	26.8036		GR1, grains2	2.07 Ga post-tectonic Aftout granitoides		WAC	Yetti-Eglab	Quartz-diorite (medium-K)	U-Pb TIMS	Zircon	2085	3		2085±3	Paleo-proterozoic	Eburnean Orogeny	Eburnean Orogeny	Peucat et al., 2005
239	-5.91062	26.8036		GR1	2.07 Ga post-tectonic Aftout granitoides		WAC	Yetti-Eglab	Quartz-diorite (medium-K)	Sm-Nd & Rb-Sr TDM	Whole Rock	2180			2180	Paleo-proterozoic	Eburnean Orogeny	Eburnean Orogeny	Peucat et al., 2005
240	-7.17698	26.6533		AL1, grain 1	2.07 Ga Yetti granitoides (high-K)		WAC	Yetti-Eglab	Rhyolite	U-Pb TIMS	Zircon	2056	1		2056±1	Paleo-proterozoic	Eburnean Orogeny	Eburnean Orogeny	Peucat et al., 2005
241	-7.17698	26.6533		AL1, grains 2	2.07 Ga Yetti granitoides (high-K)		WAC	Yetti-Eglab	Rhyolite	U-Pb TIMS	Zircon	2058	6		2058±6	Paleo-proterozoic	Eburnean Orogeny	Eburnean Orogeny	Peucat et al., 2005
242	-7.17698	26.6533		AL1, grain 3	2.07 Ga Yetti granitoides (high-K)		WAC	Yetti-Eglab	Rhyolite	U-Pb TIMS	Zircon	2072	1		2072±1	Paleo-proterozoic	Eburnean Orogeny	Eburnean Orogeny	Peucat et al., 2005
243	-7.17698	26.6533		AL1	2.07 Ga Yetti granitoides (high-K)		WAC	Yetti-Eglab	Rhyolite	Sm-Nd & Rb-Sr TDM	Whole Rock	2240			2240	Paleo-proterozoic	Eburnean Orogeny	Eburnean Orogeny	Peucat et al., 2005
244	-7.10568	26.5428		YT7, grain 1	2.07 Ga Yetti granitoides (high-K)		WAC	Yetti-Eglab	Quartz monzonite	U-Pb TIMS	Zircon	2067	14		2067±14	Paleo-proterozoic	Eburnean Orogeny	Eburnean Orogeny	Peucat et al., 2005
245	-7.10568	26.5428		YT7, grain 2	2.07 Ga Yetti granitoides (high-K)		WAC	Yetti-Eglab	Quartz monzonite	U-Pb TIMS	Zircon	2064	1		2064±1	Paleo-proterozoic	Eburnean Orogeny	Eburnean Orogeny	Peucat et al., 2005
246	-7.10568	26.5428		YT7	2.07 Ga Yetti granitoides (high-K)		WAC	Yetti-Eglab	Quartz monzonite	Sm-Nd & Rb-Sr TDM	Whole Rock	2250			2250	Paleo-proterozoic	Eburnean Orogeny	Eburnean Orogeny	Peucat et al., 2005
247	-7.01108	26.6206		YT4	2.07 Ga Yetti granitoides (high-K)		WAC	Yetti-Eglab	Aplite	Sm-Nd & Rb-Sr TDM	Whole Rock	2330			2330	Paleo-proterozoic	Eburnean Orogeny	Eburnean Orogeny	Peucat et al., 2005
248	-6.91411	26.6359		AL9	2.07 Ga Yetti granitoides (high-K)		WAC	Yetti-Eglab	Granite	Sm-Nd & Rb-Sr TDM	Whole Rock	2300			2300	Paleo-proterozoic	Eburnean Orogeny	Eburnean Orogeny	Peucat et al., 2005
249	-6.9084	26.6529		AL10	2.07 Ga Yetti granitoides (high-K)		WAC	Yetti-Eglab	Granodiorite	Sm-Nd & Rb-Sr TDM	Whole Rock	2300			2300	Paleo-proterozoic	Eburnean Orogeny	Eburnean Orogeny	Peucat et al., 2005
250	-6.8989	26.6936		AL14	2.07 Ga Yetti granitoides (high-K)		WAC	Yetti-Eglab	Monzogranite	Sm-Nd & Rb-Sr TDM	Whole Rock	2310			2310	Paleo-proterozoic	Eburnean Orogeny	Eburnean Orogeny	Peucat et al., 2005
251	-4.55205	26.3224		DRS6	Oued Souss dacitic tuff		WAC	Yetti-Eglab	Tuff	U-Pb 1270-SIMS CAMECA	Zircon	2087	9		2087±9	Paleo-proterozoic	Eburnean Orogeny	Eburnean Orogeny	Peucat et al., 2005
252	6.3439	24.0214		F25	Série de l'Arechoum	O . ln Ekran (Talat Mellet)	LATEA metacraton	Egéré-Aleskod		K-Ar	Amphibole	714	25		714±25	Neo-proterozoic	(750-665 Ma) Pan-African Orogeny	Pan-African Orogeny	Bertrand, 1974
253	6.3439	24.0214		F25	Série de l'Arechoum	O . ln Ekran (Talat Mellet)	LATEA metacraton	Egéré-Aleskod		K-Ar	Amphibole	647			647	Neo-proterozoic	(650-570 Ma) Pan-African Orogeny	Pan-African Orogeny	Bertrand, 1974
254	6.39652	23.892		G 1.8	Série de l'Arechoum	O . Ouadenki	LATEA metacraton	Egéré-Aleskod		Rb-Sr Isochron	Whole Rock	2240			2240	Paleo-proterozoic	Eburnean Orogeny	Eburnean Orogeny	Bertrand, 1974
255	6.39652	23.892		G 1.8	Série de l'Arechoum	O . Ouadenki	LATEA metacraton	Egéré-Aleskod		Rb-Sr Isochron	Whole Rock	510			510	Cambrian	(520-480 Ma) Pan-African Orogeny	Post Pan-African Orogeny	Bertrand, 1974
256	6.39652	23.892		G 1.8	Série de l'Arechoum	O . Ouadenki	LATEA metacraton	Egéré-Aleskod		Rb-Sr Isochron	Whole Rock	540			540	Cambrian	(560-520 Ma) Pan-African Orogeny	Post Pan-African Orogeny	Bertrand, 1974
257	6.39652	23.892		G 1.8	Série de l'Arechoum	O . Ouadenki	LATEA metacraton	Egéré-Aleskod		Rb-Sr	Biotite	520			520	Cambrian	(560-520 Ma) Pan-African Orogeny	Post Pan-African Orogeny	Bertrand, 1974
258	6.39652	23.892		G 1.8	Série de l'Arechoum	O . Ouadenki	LATEA metacraton	Egéré-Aleskod		K-Ar	Amphibole	624	17		624±17	Neo-proterozoic	(650-570 Ma) Pan-African Orogeny	Pan-African Orogeny	Bertrand, 1974
259	6.5263	23.8546		G6.7	Série de l'Arechoum	O .Tioussalatine	LATEA metacraton	Egéré-Aleskod		K-Ar	Amphibole	580	16		580±16	Neo-proterozoic	(650-570 Ma) Pan-African Orogeny	Pan-African Orogeny	Bertrand, 1974
260	6.50051	23.5847		F66	Série de l'Arechoum	O . Ihanlèlène	LATEA metacraton	Egéré-Aleskod		K-Ar	Amphibole	658	18		658±18	Neo-proterozoic	(750-665 Ma) Pan-African Orogeny	Pan-African Orogeny	Bertrand, 1974
261	6.16063	23.9034		E117	Série de l'Arechoum	O.Abès Abès	LATEA metacraton	Egéré-Aleskod		K-Ar	Amphibole	649	18		649±18	Neo-proterozoic	(650-570 Ma) Pan-African Orogeny	Pan-African Orogeny	Bertrand, 1974
262	6.18499	23.8844		G8.20	Série de l'Arechoum	O.Ti houn Aorani	LATEA metacraton	Egéré-Aleskod		K-Ar	Amphibole	706	20		706±20	Neo-proterozoic	(750-665 Ma) Pan-African Orogeny	Pan-African Orogeny	Bertrand, 1974
263	6.15528	23.8507		G3.11	Série de l'Arechoum	O .aux vaches	LATEA metacraton	Egéré-Aleskod		K-Ar	Amphibole	616	17		616±17	Neo-proterozoic	(650-570 Ma) Pan-African Orogeny	Pan-African Orogeny	Bertrand, 1974
264	6.15528	23.8387		G1.10	Série de l'Arechoum	O.Tarasi t Tan Taremt	LATEA metacraton	Egéré-Aleskod		K-Ar	Amphibole	622	17		622±17	Neo-proterozoic	(650-570 Ma) Pan-African Orogeny	Pan-African Orogeny	Bertrand, 1974
265	6.4046	23.8876		E43	Métadiorites	0.Ouadenki	LATEA metacraton	Egéré-Aleskod	Métadiorites	K-Ar	Amphibole	1435	39		1435±39	Meso-protezozoic	(1600-1200) Pre-Pan-African	Ante-Pan-African	Bertrand, 1974
266	6.39652	23.892		G l3.5	Métadiorites	0.Ouadenki	LATEA metacraton	Egéré-Aleskod	Métadiorites	K-Ar	Amphibole	1460	40		1460±40	Meso-protezozoic	(1600-1200) Pre-Pan-African	Ante-Pan-African	Bertrand, 1974
267	6.39652	23.892		G4.5	Métadiorites	0.Ouadenki	LATEA metacraton	Egéré-Aleskod	Métadiorites	K-Ar	Amphibole	617	17		617±17	Neo-proterozoic	(650-570 Ma) Pan-African Orogeny	Pan-African Orogeny	Bertrand, 1974
268	6.35388	24.0272		F27	Métadiorites	O . ln Ekran (Talat Mellet)	LATEA metacraton	Egéré-Aleskod	Métadiorites	K-Ar	Amphibole	647	18		647±18	Neo-proterozoic	(650-570 Ma) Pan-African Orogeny	Pan-African Orogeny	Bertrand, 1974
269	6.40888	23.8798		E61	Séries de l'Aleksod	O.Setteffet	LATEA metacraton	Egéré-Aleskod		K-Ar	Amphibole	926	26		926±26	Neo-proterozoic	(1100-870 Ma) Pan-African Rifting-Oceanization	Pan-African Oceanization	Bertrand, 1974
270	6.40888	23.8798		E63	Séries de l'Aleksod	O.Setteffet	LATEA metacraton	Egéré-Aleskod		K-Ar	Amphibole	933	26		933±26	Neo-proterozoic	(1100-870 Ma) Pan-African Rifting-Oceanization	Pan-African Oceanization	Bertrand, 1974
271	6.40888	23.8798		G2.8	Séries de l'Aleksod	O.Setteffet	LATEA metacraton	Egéré-Aleskod		K-Ar	Amphibole	706	19		706±19	Neo-proterozoic	(750-665 Ma) Pan-African Orogeny	Pan-African Orogeny	Bertrand, 1974
272	6.40888	23.8798		G2.8	Séries de l'Aleksod	O.Setteffet	LATEA metacraton	Egéré-Aleskod		K-Ar	Amphibole	733	20		733±20	Neo-proterozoic	(750-665 Ma) Pan-African Orogeny	Pan-African Orogeny	Bertrand, 1974
273	6.40888	23.8798		G3.8	Séries de l'Aleksod	O.Setteffet	LATEA metacraton	Egéré-Aleskod		K-Ar	Amphibole	697	19		697±19	Neo-proterozoic	(750-665 Ma) Pan-African Orogeny	Pan-African Orogeny	Bertrand, 1974
274	6.40888	23.8798		G4 .8	Séries de l'Aleksod	O.Setteffet	LATEA metacraton	Egéré-Aleskod		K-Ar	Amphibole	914	25		914±25	Neo-proterozoic	(1100-870 Ma) Pan-African Rifting-Oceanization	Pan-African Oceanization	Bertrand, 1974
275	6.245	23.7349		E104 . 6	Séries de l'Aleksod	Guelta Agenou	LATEA metacraton	Egéré-Aleskod		Rb-Sr Isochron	Whole Rock	1050			1050	Meso-protezozoic	(1100-870 Ma) Pan-African Rifting-Oceanization	Pan-African Oceanization	Bertrand, 1974
276	6.245	23.7349		E104 . 6	Séries de l'Aleksod	Guelta Agenou	LATEA metacraton	Egéré-Aleskod		K-Ar	Amphibole	974	27		974±27	Neo-proterozoic	(1100-870 Ma) Pan-African Rifting-Oceanization	Pan-African Oceanization	Bertrand, 1974
277	6.53141	23.6854		F74 .1	Pluton tardif	O. Aha'n'Souri	LATEA metacraton	Egéré-Aleskod	Pluton tardif	K-Ar	Amphibole	595	17		595±17	Neo-proterozoic	(650-570 Ma) Pan-African Orogeny	Pan-African Orogeny	Bertrand, 1974
278	6.18142	23.8393		E97 B61-G9	Série de l'Arechoum	O. Tarasit tan Amane	LATEA metacraton	Egéré-Aleskod		Rb-Sr	Whole Rock	2730	100		2730±100	Archean	Ouzzalian Orogeny	Archean	Bertrand, 1974
279	6.18142	23.8393		E97 B61-G9	Série de l'Arechoum	O. Tarasit tan Amane	LATEA metacraton	Egéré-Aleskod		Rb-Sr	Whole Rock	2580	90		2580±90	Archean	Liberian Orogeny	Archean	Bertrand, 1974
280	6.18142	23.8393		E97 B61-G9	Série de l'Arechoum		LATEA metacraton	Egéré-Aleskod		Rb-Sr Isochron	Whole Rock	1940			1940	Paleo-proterozoic	Eburnean Orogeny	Eburnean Orogeny	Bertrand, 1974
281	6.18142	23.8393		E97 B61-G9	Série de l'Arechoum		LATEA metacraton	Egéré-Aleskod		Rb-Sr Isochron	Whole Rock	910			910	Neo-proterozoic	(1100-870 Ma) Pan-African Rifting-Oceanization	Pan-African Oceanization	Bertrand, 1974
282	6.18142	23.8393		E97 B61-G9	Série de l'Arechoum		LATEA metacraton	Egéré-Aleskod		Rb-Sr Isochron	Whole Rock	515			515	Cambrian	(520-480 Ma) Pan-African Orogeny	Post Pan-African Orogeny	Bertrand, 1974
283	6.18142	23.8393		E97 B61-G9	Série de l'Arechoum		LATEA metacraton	Egéré-Aleskod		Rb-Sr Isochron	Whole Rock	510			510	Cambrian	(520-480 Ma) Pan-African Orogeny	Post Pan-African Orogeny	Bertrand, 1974
284	6.16419	23.8844		G21 E109	Série de l'Arechoum	O. Tihoun Aorani	LATEA metacraton	Egéré-Aleskod		Rb-Sr	Whole Rock	2450	100		2450±100	Archean	Liberian Orogeny	Archean	Bertrand, 1974
285	6.16419	23.8844		G21 E109	Série de l'Arechoum		LATEA metacraton	Egéré-Aleskod		Rb-Sr Isochron	Whole Rock	1940			1940	Paleo-proterozoic	Eburnean Orogeny	Eburnean Orogeny	Bertrand, 1974
286	6.16419	23.8844		G21 E109	Série de l'Arechoum		LATEA metacraton	Egéré-Aleskod		Rb-Sr Isochron	Whole Rock	910			910	Neo-proterozoic	(1100-870 Ma) Pan-African Rifting-Oceanization	Pan-African Oceanization	Bertrand, 1974
287	6.16419	23.8844		G21 E109	Série de l'Arechoum		LATEA metacraton	Egéré-Aleskod		Rb-Sr Isochron	Whole Rock	515			515	Cambrian	(520-480 Ma) Pan-African Orogeny	Post Pan-African Orogeny	Bertrand, 1974
288	6.16419	23.8844		G21 E109	Série de l'Arechoum		LATEA metacraton	Egéré-Aleskod		Rb-Sr Isochron	Whole Rock	510			510	Cambrian	(520-480 Ma) Pan-African Orogeny	Post Pan-African Orogeny	Bertrand, 1974
289	6.54816	23.8237		E37-38	Série de l'Arechoum		LATEA metacraton	Egéré-Aleskod		Rb-Sr Isochron	Whole Rock	2110			2110	Paleo-proterozoic	Eburnean Orogeny	Eburnean Orogeny	Bertrand, 1974
290	6.54816	23.8237		E37-38	Série de l'Arechoum		LATEA metacraton	Egéré-Aleskod		Rb-Sr Isochron	Whole Rock	930			930	Neo-proterozoic	(1100-870 Ma) Pan-African Rifting-Oceanization	Pan-African Oceanization	Bertrand, 1974
291	6.54816	23.8237		E37-38	Série de l'Arechoum		LATEA metacraton	Egéré-Aleskod		Rb-Sr Isochron	Whole Rock	560			560	Neo-proterozoic	(560-520 Ma) Pan-African Orogeny	Pan-African Orogeny	Bertrand, 1974
292	6.44276	23.8735		G6 E58		O . Ouadenki	LATEA metacraton	Egéré-Aleskod		Rb-Sr	Biotite	505	20		505±20	Cambrian	(520-480 Ma) Pan-African Orogeny	Post Pan-African Orogeny	Bertrand, 1974
293	6.44276	23.8735		G6 E58		O . Ouadenki	LATEA metacraton	Egéré-Aleskod		Rb-Sr	Muscovite	800	30		800±30	Neo-proterozoic	(840-750) Pan-African Rifting	Pan-African Oceanization	Bertrand, 1974
294	6.44063	23.8872				O . Ouadenki	LATEA metacraton	Egéré-Aleskod		Rb-Sr	Muscovite	830			830	Neo-proterozoic	(870-840 Ma) Pan-African Rifting	Pan-African Oceanization	Bertrand, 1974
295	4.97183	22.2676					LATEA metacraton	Tefedest	granite	Rb-Sr	Biotite	508			508	Cambrian	(520-480 Ma) Pan-African Orogeny	Post Pan-African Orogeny	Bertrand, 1974
296	4.97183	22.2676					LATEA metacraton	Tefedest	granite	Rb-Sr	Whole Rock	450			450	Ordovician	Ordovician "Taconic"	Post Pan-African Orogeny	Bertrand, 1974
297	4.97183	22.2676					LATEA metacraton	Tefedest	granite	K-Ar	Whole Rock	610			610	Neo-proterozoic	(650-570 Ma) Pan-African Orogeny	Pan-African Orogeny	Bertrand, 1974
298	5.69913	22.4303					LATEA metacraton	Laouni	granite	Rb-Sr	Biotite	635			635	Neo-proterozoic	(650-570 Ma) Pan-African Orogeny	Pan-African Orogeny	Bertrand, 1974
299	5.69913	22.4303					LATEA metacraton	Laouni	granite	Pb-Pb	Zircon	630			630	Neo-proterozoic	(650-570 Ma) Pan-African Orogeny	Pan-African Orogeny	Bertrand, 1974
300	5.69913	22.4303					LATEA metacraton	Laouni	granite	Pb-Pb	Zircon	505			505	Cambrian	(520-480 Ma) Pan-African Orogeny	Post Pan-African Orogeny	Bertrand, 1974
301	5.7229	22.5313					LATEA metacraton	Laouni	granite	Pb-Pb	Zircon	595			595	Neo-proterozoic	(650-570 Ma) Pan-African Orogeny	Pan-African Orogeny	Bertrand, 1974
302	5.7229	22.5313					LATEA metacraton	Laouni	granite	Pb-Pb	Zircon	635			635	Neo-proterozoic	(650-570 Ma) Pan-African Orogeny	Pan-African Orogeny	Bertrand, 1974
303	5.7229	22.5313					LATEA metacraton	Laouni	granite	Rb-Sr	Biotite	700			700	Neo-proterozoic	(750-665 Ma) Pan-African Orogeny	Pan-African Orogeny	Bertrand, 1974
304	5.70864	22.6937					LATEA metacraton	Laouni	granite	K-Ar	Zinnwaldite	479			479	Ordovician	(520-480 Ma) Pan-African Orogeny	Post Pan-African Orogeny	Bertrand, 1974
305	5.70864	22.6937					LATEA metacraton	Laouni	granite	K-Ar	Biotite	485			485	Ordovician	(520-480 Ma) Pan-African Orogeny	Post Pan-African Orogeny	Bertrand, 1974
306	5.67536	22.7507					LATEA metacraton	Laouni	granite	Rb-Sr	Biotite	515			515	Cambrian	(520-480 Ma) Pan-African Orogeny	Post Pan-African Orogeny	Bertrand, 1974
307	5.67536	22.7507					LATEA metacraton	Laouni	granite	Rb-Sr	Whole Rock	482			482	Ordovician	(520-480 Ma) Pan-African Orogeny	Post Pan-African Orogeny	Bertrand, 1974
308	5.67536	22.7507					LATEA metacraton	Laouni	granite	Rb-Sr	Muscovite	497			497	Cambrian	(520-480 Ma) Pan-African Orogeny	Post Pan-African Orogeny	Bertrand, 1974
309	5.96058	22.698					LATEA metacraton	Azrou-n-fad	granite	K-Ar	Biotite	470			470	Ordovician	Ordovician "Taconic"	Post Pan-African Orogeny	Bertrand, 1974
310	5.93206	22.7682		Zw 495			LATEA metacraton	Azrou-n-fad	granite	Rb-Sr	Zinnwaldite	495			495	Cambrian	(520-480 Ma) Pan-African Orogeny	Post Pan-African Orogeny	Bertrand, 1974
311	5.57554	22.9916		Bi 480			LATEA metacraton	Laouni	granite	Rb-Sr	Biotite	480			480	Ordovician	(520-480 Ma) Pan-African Orogeny	Post Pan-African Orogeny	Bertrand, 1974
312	5.54702	23.0747		Ms481			LATEA metacraton	Laouni	Schisres-Gneiss	K-Ar	Muscovite	481			481	Ordovician	(520-480 Ma) Pan-African Orogeny	Post Pan-African Orogeny	Bertrand, 1974
313	5.52325	23.1359					LATEA metacraton	Laouni	granite	Rb-Sr	Biotite	520			520	Cambrian	(560-520 Ma) Pan-African Orogeny	Post Pan-African Orogeny	Bertrand, 1974
314	6.78295	22.7463		Min 520			LATEA metacraton	Egéré-Aleskod	Schisres-Gneiss	Rb-Sr Isochron	Whole Rock	520			520	Cambrian	(560-520 Ma) Pan-African Orogeny	Post Pan-African Orogeny	Bertrand, 1974
315	5.48046	20.6262		Bi 521			LATEA metacraton	Laouni	granite	K-Ar	Biotite	521			521	Cambrian	(560-520 Ma) Pan-African Orogeny	Post Pan-African Orogeny	Bertrand, 1974
316	4.94331	20.145					LATEA metacraton	Laouni	granite	K-Ar	Muscovite	521			521	Cambrian	(560-520 Ma) Pan-African Orogeny	Post Pan-African Orogeny	Bertrand, 1974
317	4.94331	20.145		Ms521, Zw 537			LATEA metacraton	Laouni	granite	K-Ar	Zinnwaldite	537			537	Cambrian	(560-520 Ma) Pan-African Orogeny	Post Pan-African Orogeny	Bertrand, 1974
318	4.98134	20.2074					LATEA metacraton	Laouni	granite	Rb-Sr	Zinnwaldite	510			510	Cambrian	(520-480 Ma) Pan-African Orogeny	Post Pan-African Orogeny	Bertrand, 1974
319	4.98134	20.2074					LATEA metacraton	Laouni	granite	Rb-Sr	K-Feldspar	500			500	Cambrian	(520-480 Ma) Pan-African Orogeny	Post Pan-African Orogeny	Bertrand, 1974
320	5.05264	23.9421					LATEA metacraton	Tefedest	granite	Rb-Sr	Whole Rock	520			520	Cambrian	(560-520 Ma) Pan-African Orogeny	Post Pan-African Orogeny	Bertrand, 1974
321	5.05264	23.9421					LATEA metacraton	Tefedest	granite	Rb-Sr	Muscovite	532			532	Cambrian	(560-520 Ma) Pan-African Orogeny	Post Pan-African Orogeny	Bertrand, 1974
322	5.05264	23.9421		RT 520, Ms 532, Bi 532			LATEA metacraton	Tefedest	granite	Rb-Sr	Biotite	532			532	Cambrian	(560-520 Ma) Pan-African Orogeny	Post Pan-African Orogeny	Bertrand, 1974
323	4.96232	24.1071		Ms570			LATEA metacraton	Tefedest	Schisres-Gneiss	Rb-Sr	Muscovite	570			570	Neo-proterozoic	(650-570 Ma) Pan-African Orogeny	Pan-African Orogeny	Bertrand, 1974
324	5.10493	24.9159		Bi 417			LATEA metacraton	Tefedest	granite	Rb-Sr	Biotite	417			417	Devonian	Devonian "Caledonian"	Caledonian Orogeny	Bertrand, 1974
325	5.63733	24.2372		Bi 416			LATEA metacraton	Tefedest	granite	Rb-Sr	Biotite	416			416	Devonian	Devonian "Caledonian"	Caledonian Orogeny	Bertrand, 1974
326	5.89878	25.3935		Bi 593			LATEA metacraton	Egéré-Aleskod	Schisres-Gneiss	Rb-Sr	Biotite	593			593	Neo-proterozoic	(650-570 Ma) Pan-African Orogeny	Pan-African Orogeny	Bertrand, 1974
327	5.95582	25.4536					LATEA metacraton	Egéré-Aleskod	Schisres-Gneiss	Rb-Sr	Muscovite	626			626	Neo-proterozoic	(650-570 Ma) Pan-African Orogeny	Pan-African Orogeny	Bertrand, 1974
328	5.95582	25.4536					LATEA metacraton	Egéré-Aleskod	Schisres-Gneiss	Rb-Sr	Biotite	506			506	Cambrian	(520-480 Ma) Pan-African Orogeny	Post Pan-African Orogeny	Bertrand, 1974
329	5.95582	25.4536		RT 968, Ms 626, Bi 506			LATEA metacraton	Egéré-Aleskod	Schisres-Gneiss	Rb-Sr	Whole Rock	968			968	Neo-proterozoic	(1100-870 Ma) Pan-African Rifting-Oceanization	Pan-African Oceanization	Bertrand, 1974
330	6.03188	25.8564		Bi 576			LATEA metacraton	Egéré-Aleskod	Schisres-Gneiss	Rb-Sr	Biotite	576			576	Neo-proterozoic	(650-570 Ma) Pan-African Orogeny	Pan-African Orogeny	Bertrand, 1974
331	5.75617	26.1299					LATEA metacraton	Egéré-Aleskod	Schisres-Gneiss	Rb-Sr	Whole Rock	1157			1157	Meso-protezozoic	(1600-1200) Pre-Pan-African	Ante-Pan-African	Bertrand, 1974
332	5.75617	26.1299		RT 1157,Ms 1210			LATEA metacraton	Egéré-Aleskod	Schisres-Gneiss	Rb-Sr	Muscovite	1210			1210	Meso-protezozoic	(1600-1200) Pre-Pan-African	Ante-Pan-African	Bertrand, 1974
333	5.69438	26.2109		Bi 570			LATEA metacraton	Egéré-Aleskod	granite	Rb-Sr	Biotite	570			570	Neo-proterozoic	(650-570 Ma) Pan-African Orogeny	Pan-African Orogeny	Bertrand, 1974
334	7.20127	24.9202		RT2000,RT1870			LATEA metacraton	Egéré-Aleskod	Schisres-Gneiss	Rb-Sr Isochron	Whole Rock	2000			2000	Paleo-proterozoic	Eburnean Orogeny	Eburnean Orogeny	Bertrand, 1974
335	7.20127	24.9202		RT2000,RT1870			LATEA metacraton	Egéré-Aleskod	Schisres-Gneiss	Rb-Sr Isochron	Whole Rock	1870			1870	Paleo-proterozoic	Eburnean Orogeny	Eburnean Orogeny	Bertrand, 1974
336	7.31535	24.0897		Ms 960			LATEA metacraton	Serouenout	Schisres-Gneiss	Rb-Sr	Muscovite	960			960	Neo-proterozoic	(1100-870 Ma) Pan-African Rifting-Oceanization	Pan-African Oceanization	Bertrand, 1974
337	7.48173	23.7943					LATEA metacraton	Serouenout	granite	Pb-Pb	Zircon	515			515	Cambrian	(520-480 Ma) Pan-African Orogeny	Post Pan-African Orogeny	Bertrand, 1974
338	7.48173	23.7943					LATEA metacraton	Serouenout	granite	Pb-Pb	Zircon	545			545	Neo-proterozoic	(560-520 Ma) Pan-African Orogeny	Pan-African Orogeny	Bertrand, 1974
339	7.48173	23.7943					LATEA metacraton	Serouenout	granite	Pb-Pb	Zircon	625			625	Neo-proterozoic	(650-570 Ma) Pan-African Orogeny	Pan-African Orogeny	Bertrand, 1974
340	7.48173	23.7943					LATEA metacraton	Serouenout	granite	Pb-Pb	Zircon	650			650	Neo-proterozoic	(650-570 Ma) Pan-African Orogeny	Pan-African Orogeny	Bertrand, 1974
341	7.48173	23.7943		Z515,Z545,Z625,Z650,Bi530			LATEA metacraton	Serouenout	granite	Rb-Sr	Biotite	530			530	Cambrian	(560-520 Ma) Pan-African Orogeny	Post Pan-African Orogeny	Bertrand, 1974
342	7.515	23.7508		Bi515,Bi525			LATEA metacraton	Serouenout	granite	Rb-Sr	Biotite	515			515	Cambrian	(520-480 Ma) Pan-African Orogeny	Post Pan-African Orogeny	Bertrand, 1974
343	7.515	23.7508		Bi515,Bi525			LATEA metacraton	Serouenout	granite	Rb-Sr	Biotite	525			525	Cambrian	(560-520 Ma) Pan-African Orogeny	Post Pan-African Orogeny	Bertrand, 1974
344	7.62909	23.7073					LATEA metacraton	Serouenout	Schisres-Gneiss	Rb-Sr	Biotite	658			658	Neo-proterozoic	(750-665 Ma) Pan-African Orogeny	Pan-African Orogeny	Bertrand, 1974
345	7.62909	23.7073		Bi 658,Ms949			LATEA metacraton	Serouenout	Schisres-Gneiss	Rb-Sr	Muscovite	949			949	Neo-proterozoic	(1100-870 Ma) Pan-African Rifting-Oceanization	Pan-African Oceanization	Bertrand, 1974
346	7.66236	23.6638		Ms578			LATEA metacraton	Serouenout	Schisres-Gneiss	K-Ar	Muscovite	578			578	Neo-proterozoic	(650-570 Ma) Pan-African Orogeny	Pan-African Orogeny	Bertrand, 1974
347	7.44845	23.6246		Bi 614			LATEA metacraton	Serouenout	granite	Rb-Sr	Biotite	614			614	Neo-proterozoic	(650-570 Ma) Pan-African Orogeny	Pan-African Orogeny	Bertrand, 1974
348	7.92381	23.4938					LATEA metacraton	Serouenout	granite	Rb-Sr	Biotite	561			561	Neo-proterozoic	(560-520 Ma) Pan-African Orogeny	Pan-African Orogeny	Bertrand, 1974
349	7.92381	23.4938		Bi561,Min553			LATEA metacraton	Serouenout	granite	Rb-Sr Isochron	Whole Rock	553			553	Neo-proterozoic	(560-520 Ma) Pan-African Orogeny	Pan-African Orogeny	Bertrand, 1974
350	7.33912	23.4938					LATEA metacraton	Serouenout	granite	Rb-Sr	Biotite	650			650	Neo-proterozoic	(650-570 Ma) Pan-African Orogeny	Pan-African Orogeny	Bertrand, 1974
351	7.33912	23.4938					LATEA metacraton	Serouenout	granite	Rb-Sr	Muscovite	650			650	Neo-proterozoic	(650-570 Ma) Pan-African Orogeny	Pan-African Orogeny	Bertrand, 1974
352	7.33912	23.4938		Bi650,Ms650,Min561			LATEA metacraton	Serouenout	granite	Rb-Sr Isochron	Whole Rock	561			561	Neo-proterozoic	(560-520 Ma) Pan-African Orogeny	Pan-African Orogeny	Bertrand, 1974
353	7.07292	23.411		Bi547			LATEA metacraton	Serouenout	granite	Rb-Sr	Biotite	547			547	Neo-proterozoic	(560-520 Ma) Pan-African Orogeny	Pan-African Orogeny	Bertrand, 1974
354	7.1775	23.4153		Ms693,Ms751			LATEA metacraton	Serouenout	Schisres-Gneiss	Rb-Sr	Muscovite	751			751	Neo-proterozoic	(750-665 Ma) Pan-African Orogeny	Pan-African Oceanization	Bertrand, 1974
355	7.1775	23.4153		Ms693,Ms751			LATEA metacraton	Serouenout	Schisres-Gneiss	Rb-Sr	Muscovite	693			693	Neo-proterozoic	(750-665 Ma) Pan-African Orogeny	Pan-African Orogeny	Bertrand, 1974
356	2.72396	23.4226		Inz 34A		In Roccan	West Hoggar	IOGU	Serpentinized harzburgite			N/D			N/D				Peucat et al., 1996
357	2.72396	23.4226		Inz 39		In Roccan	West Hoggar	IOGU	Serpentinized harzburgite			N/D			N/D				Peucat et al., 1996
358	2.72396	23.4226		Inz 36		In Roccan	West Hoggar	IOGU	Spinel- pyroxenite	Sm-Nd TDM	Whole Rock	3519			3519	Archean	Ouzzalian Orogeny	Archean	Peucat et al., 1996
359	2.72396	23.4226		Inz 32		In Roccan	West Hoggar	IOGU	Norite (pyriclasite)	Sm-Nd TDM	Whole Rock	4193			4193	Archean	Ouzzalian Orogeny	Archean	Peucat et al., 1996
360	2.89509	23.2532		Inz 20		Tin Tchik Tchik	West Hoggar	IOGU	Norite (pyriclasite)	Sm-Nd TDM	Whole Rock	3136			3136	Archean	Ouzzalian Orogeny	Archean	Peucat et al., 1996
361	2.80762	23.4104		Inz 13		Alouki	West Hoggar	IOGU	Norite (pyriclasite)	Sm-Nd TDM	Whole Rock	3745			3745	Archean	Ouzzalian Orogeny	Archean	Peucat et al., 1996
362	2.89509	23.2532		Inz 21		Tin Tchik Tchik	West Hoggar	IOGU	Norite (pyriclasite)			N/D			N/D				Peucat et al., 1996
363	2.72396	23.4226		Inz 31		In Roccan	West Hoggar	IOGU	Norite (pyriclasite)	Sm-Nd TDM	Whole Rock	3485			3485	Archean	Ouzzalian Orogeny	Archean	Peucat et al., 1996
364	2.80762	23.4104		Inz 12	Anorthosite	Alouki	West Hoggar	IOGU	Anorthositic gneiss	Pb-Pb CAMECA	Whole Rock	1992			1992	Paleo-proterozoic	Eburnean Orogeny	Eburnean Orogeny	Peucat et al., 1996
365	2.80762	23.4104		Inz 12	Anorthosite	Alouki	West Hoggar	IOGU	Anorthositic gneiss	Pb-Pb CAMECA	Whole Rock	2000			2000	Paleo-proterozoic	Eburnean Orogeny	Eburnean Orogeny	Peucat et al., 1996
366	2.80762	23.4104		Inz 12	Anorthosite	Alouki	West Hoggar	IOGU	Anorthositic gneiss	Pb-Pb CAMECA	Whole Rock	1994			1994	Paleo-proterozoic	Eburnean Orogeny	Eburnean Orogeny	Peucat et al., 1996
367	2.80762	23.4104		Inz 12	Anorthosite	Alouki	West Hoggar	IOGU	Anorthositic gneiss	Pb-Pb CAMECA	Whole Rock	2002			2002	Paleo-proterozoic	Eburnean Orogeny	Eburnean Orogeny	Peucat et al., 1996
368	2.80762	23.4104		Inz 12	Anorthosite	Alouki	West Hoggar	IOGU	Anorthositic gneiss	Pb-Pb CAMECA	Whole Rock	1968			1968	Paleo-proterozoic	Eburnean Orogeny	Eburnean Orogeny	Peucat et al., 1996
369	2.80762	23.4104		Inz 12	Anorthosite	Alouki	West Hoggar	IOGU	Anorthositic gneiss	Pb-Pb CAMECA	Whole Rock	1983			1983	Paleo-proterozoic	Eburnean Orogeny	Eburnean Orogeny	Peucat et al., 1996
370	2.80762	23.4104		Inz 12		Alouki	West Hoggar	IOGU	Anorthositic gneiss	Sm-Nd TDM	Whole Rock	2834			2834	Archean	Ouzzalian Orogeny	Archean	Peucat et al., 1996
371	2.72396	23.4226		Inz 30		In Roccan	West Hoggar	IOGU	2Pyx-charnockite			N/D			N/D				Peucat et al., 1996
372	2.89509	23.2532		Inz 87	Opx-bearing tonalitic gneiss	Tin Tchik Tchik	West Hoggar	IOGU	2Pyx-charnockite	U-Pb ID-TIMS	Whole Rock	2400			2400	Paleo-proterozoic	Eburnean Orogeny	Eburnean Orogeny	Peucat et al., 1996
373	2.89509	23.2532		Inz 87	Opx-bearing tonalitic gneiss	Tin Tchik Tchik	West Hoggar	IOGU	2Pyx-charnockite	U-Pb	Whole Rock	2540			2540	Archean	Liberian Orogeny	Archean	Peucat et al., 1996
374	2.89509	23.2532		Inz 87	Opx-bearing tonalitic gneiss	Tin Tchik Tchik	West Hoggar	IOGU	2Pyx-charnockite	U-Pb	Whole Rock	2370			2370	Paleo-proterozoic	Eburnean Orogeny	Eburnean Orogeny	Peucat et al., 1996
375	2.89509	23.2532		Inz 87	Opx-bearing tonalitic gneiss	Tin Tchik Tchik	West Hoggar	IOGU	2Pyx-charnockite	U-Pb SHRIMP	Whole Rock	2700			2700	Archean	Liberian Orogeny	Archean	Peucat et al., 1996
376	2.89509	23.2532		Inz 87	Opx-bearing tonalitic gneiss	Tin Tchik Tchik	West Hoggar	IOGU	2Pyx-charnockite	U-Pb SHRIMP	Whole Rock	2600			2600	Archean	Liberian Orogeny	Archean	Peucat et al., 1996
377	2.89509	23.2532		Inz 87	Opx-bearing tonalitic gneiss	Tin Tchik Tchik	West Hoggar	IOGU	2Pyx-charnockite	U-Pb SHRIMP	Whole Rock	2500			2500	Archean	Liberian Orogeny	Archean	Peucat et al., 1996
378	2.89509	23.2532		Inz 87	Opx-bearing tonalitic gneiss	Tin Tchik Tchik	West Hoggar	IOGU	2Pyx-charnockite	U-Pb SHRIMP	Whole Rock	2400			2400	Paleo-proterozoic	Eburnean Orogeny	Eburnean Orogeny	Peucat et al., 1996
379	2.89509	23.2532		Inz 87	Opx-bearing tonalitic gneiss	Tin Tchik Tchik	West Hoggar	IOGU	2Pyx-charnockite	U-Pb SHRIMP	Whole Rock	2200			2200	Paleo-proterozoic	Eburnean Orogeny	Eburnean Orogeny	Peucat et al., 1996
380	2.89509	23.2532		Inz 87	Opx-bearing tonalitic gneiss	Tin Tchik Tchik	West Hoggar	IOGU	2Pyx-charnockite	U-Pb SHRIMP	Whole Rock	2100			2100	Paleo-proterozoic	Eburnean Orogeny	Eburnean Orogeny	Peucat et al., 1996
381	2.89509	23.2532		Inz 87	Opx-bearing tonalitic gneiss	Tin Tchik Tchik	West Hoggar	IOGU	2Pyx-charnockite	U-Pb SHRIMP	Whole Rock	2768	17		2768±17	Archean	Ouzzalian Orogeny	Archean	Peucat et al., 1996
382	2.89509	23.2532		Inz 87	Opx-bearing tonalitic gneiss	Tin Tchik Tchik	West Hoggar	IOGU	2Pyx-charnockite	Pb-Pb CAMECA	Whole Rock	2388			2388	Paleo-proterozoic	Eburnean Orogeny	Eburnean Orogeny	Peucat et al., 1996
383	2.89509	23.2532		Inz 87	Opx-bearing tonalitic gneiss	Tin Tchik Tchik	West Hoggar	IOGU	2Pyx-charnockite	Pb-Pb CAMECA	Whole Rock	2407			2407	Paleo-proterozoic	Eburnean Orogeny	Eburnean Orogeny	Peucat et al., 1996
384	2.89509	23.2532		Inz 87	Opx-bearing tonalitic gneiss	Tin Tchik Tchik	West Hoggar	IOGU	2Pyx-charnockite	Pb-Pb CAMECA	Whole Rock	2536			2536	Archean	Liberian Orogeny	Archean	Peucat et al., 1996
385	2.89509	23.2532		Inz 87	Opx-bearing tonalitic gneiss	Tin Tchik Tchik	West Hoggar	IOGU	2Pyx-charnockite	Pb-Pb CAMECA	Whole Rock	2365			2365	Paleo-proterozoic	Eburnean Orogeny	Eburnean Orogeny	Peucat et al., 1996
386	2.89509	23.2532		Inz 87		Tin Tchik Tchik	West Hoggar	IOGU	2Pyx-charnockite	Sm-Nd TDM	Whole Rock	3350			3350	Archean	Ouzzalian Orogeny	Archean	Peucat et al., 1996
387	2.89509	23.2532		Inz 16		Tin Tchik Tchik	West Hoggar	IOGU	2Pyx-charnockite	Sm-Nd TDM	Whole Rock	3336			3336	Archean	Ouzzalian Orogeny	Archean	Peucat et al., 1996
388	2.89509	23.2532		Inz 90		Tin Tchik Tchik	West Hoggar	IOGU	2Pyx-charnockite	Sm-Nd TDM	Whole Rock	3031			3031	Archean	Ouzzalian Orogeny	Archean	Peucat et al., 1996
389	2.89509	23.2532		Inz85		Tin Tchik Tchik	West Hoggar	IOGU	Charnockite	Sm-Nd TDM	Whole Rock	3180			3180	Archean	Ouzzalian Orogeny	Archean	Peucat et al., 1996
390	2.72396	23.4226		Inz 44		In Roccan	West Hoggar	IOGU	2Pyx-charnockite	Sm-Nd TDM	Whole Rock	3646			3646	Archean	Ouzzalian Orogeny	Archean	Peucat et al., 1996
391	2.89889	22.9542		Inz 60		Tan Afella	West Hoggar	IOGU	Cpx-gneiss			N/D			N/D				Peucat et al., 1996
392	2.79431	22.9016		Inz 103		Khanfouss	West Hoggar	IOGU	Cpx-gneiss	Sm-Nd TDM	Whole Rock	3428			3428	Archean	Ouzzalian Orogeny	Archean	Peucat et al., 1996
393	2.79431	22.9016		Inz 92	Cpx-bearing alkaline monzogranitic gneiss	Khanfouss	West Hoggar	IOGU	Cpx-gneiss	Pb-Pb CAMECA	Whole Rock	2369			2369	Paleo-proterozoic	Eburnean Orogeny	Eburnean Orogeny	Peucat et al., 1996
394	2.79431	22.9016		Inz 92	Cpx-bearing alkaline monzogranitic gneiss	Khanfouss	West Hoggar	IOGU	Cpx-gneiss	Pb-Pb CAMECA	Whole Rock	2403			2403	Paleo-proterozoic	Eburnean Orogeny	Eburnean Orogeny	Peucat et al., 1996
395	2.79431	22.9016		Inz 92		Khanfouss	West Hoggar	IOGU	Cpx-gneiss	Sm-Nd TDM	Whole Rock	3379			3379	Archean	Ouzzalian Orogeny	Archean	Peucat et al., 1996
396	2.69544	22.9279		Inz 76		Tan Ataram	West Hoggar	IOGU	Cpx-gneiss			N/D			N/D				Peucat et al., 1996
397	2.69544	22.9279		Inz 73	Cpx-bearing alkaline monzogranitic gneiss	Tan Ataram	West Hoggar	IOGU	Cpx-gneiss	U-Pb ID-TIMS	Zircon	2650			2650	Archean	Liberian Orogeny	Archean	Peucat et al., 1996
398	2.69544	22.9279		Inz 73	Cpx-bearing alkaline monzogranitic gneiss	Tan Ataram	West Hoggar	IOGU	Cpx-gneiss	U-Pb ID-TIMS	Zircon	2000			2000	Paleo-proterozoic	Eburnean Orogeny	Eburnean Orogeny	Peucat et al., 1996
399	2.69544	22.9279		Inz 73	Cpx-bearing alkaline monzogranitic gneiss	Tan Ataram	West Hoggar	IOGU	Cpx-gneiss	U-Pb	Zircon	2070			2070	Paleo-proterozoic	Eburnean Orogeny	Eburnean Orogeny	Peucat et al., 1996
400	2.69544	22.9279		Inz 73	Cpx-bearing alkaline monzogranitic gneiss	Tan Ataram	West Hoggar	IOGU	Cpx-gneiss	U-Pb	Zircon	2400			2400	Paleo-proterozoic	Eburnean Orogeny	Eburnean Orogeny	Peucat et al., 1996
401	2.69544	22.9279		Inz 73	Cpx-bearing alkaline monzogranitic gneiss	Tan Ataram	West Hoggar	IOGU	Cpx-gneiss	U-Pb SHRIMP	Zircon	2650	10		2650±10	Archean	Liberian Orogeny	Archean	Peucat et al., 1996
402	2.69544	22.9279		Inz 73	Cpx-bearing alkaline monzogranitic gneiss	Tan Ataram	West Hoggar	IOGU	Cpx-gneiss	U-Pb SHRIMP	Zircon	2700			2700	Archean	Liberian Orogeny	Archean	Peucat et al., 1996
403	2.69544	22.9279		Inz 73	Cpx-bearing alkaline monzogranitic gneiss	Tan Ataram	West Hoggar	IOGU	Cpx-gneiss	U-Pb SHRIMP	Zircon	1770			1770	Paleo-proterozoic	Eburnean Orogeny	Eburnean Orogeny	Peucat et al., 1996
404	2.69544	22.9279		Inz 73	Cpx-bearing alkaline monzogranitic gneiss	Tan Ataram	West Hoggar	IOGU	Cpx-gneiss	U-Pb SHRIMP	Zircon	2730			2730	Archean	Ouzzalian Orogeny	Archean	Peucat et al., 1996
405	2.69544	22.9279		Inz 73	Cpx-bearing alkaline monzogranitic gneiss	Tan Ataram	West Hoggar	IOGU	Cpx-gneiss	U-Pb SHRIMP	Zircon	2690			2690	Archean	Liberian Orogeny	Archean	Peucat et al., 1996
406	2.69544	22.9279		Inz 73	Cpx-bearing alkaline monzogranitic gneiss	Tan Ataram	West Hoggar	IOGU	Cpx-gneiss	U-Pb SHRIMP	Zircon	2550			2550	Archean	Liberian Orogeny	Archean	Peucat et al., 1996
407	2.69544	22.9279		Inz 73	Cpx-bearing alkaline monzogranitic gneiss	Tan Ataram	West Hoggar	IOGU	Cpx-gneiss	U-Pb SHRIMP	Zircon	2650			2650	Archean	Liberian Orogeny	Archean	Peucat et al., 1996
408	2.69544	22.9279		Inz 73	Cpx-bearing alkaline monzogranitic gneiss	Tan Ataram	West Hoggar	IOGU	Cpx-gneiss	U-Pb SHRIMP	Zircon	2700			2700	Archean	Liberian Orogeny	Archean	Peucat et al., 1996
409	2.69544	22.9279		Inz 73	Cpx-bearing alkaline monzogranitic gneiss	Tan Ataram	West Hoggar	IOGU	Cpx-gneiss	Pb-Pb CAMECA	Zircon	2204			2204	Paleo-proterozoic	Eburnean Orogeny	Eburnean Orogeny	Peucat et al., 1996
410	2.69544	22.9279		Inz 73		Tan Ataram	West Hoggar	IOGU	Cpx-gneiss	Sm-Nd TDM	Whole Rock	3399			3399	Archean	Ouzzalian Orogeny	Archean	Peucat et al., 1996
411	2.69544	22.9279		Inz 78	Cpx-bearing alkaline monzogranitic gneiss	Tan Ataram	West Hoggar	IOGU	Cpx-gneiss	Pb-Pb CAMECA	Zircon	2066			2066	Paleo-proterozoic	Eburnean Orogeny	Eburnean Orogeny	Peucat et al., 1996
412	2.69544	22.9279		Inz 78	Cpx-bearing alkaline monzogranitic gneiss	Tan Ataram	West Hoggar	IOGU	Cpx-gneiss	Pb-Pb CAMECA	Zircon	2142			2142	Paleo-proterozoic	Eburnean Orogeny	Eburnean Orogeny	Peucat et al., 1996
413	2.69544	22.9279		Inz 78	Cpx-bearing alkaline monzogranitic gneiss	Tan Ataram	West Hoggar	IOGU	Cpx-gneiss	Pb-Pb CAMECA	Zircon	2183			2183	Paleo-proterozoic	Eburnean Orogeny	Eburnean Orogeny	Peucat et al., 1996
414	2.69544	22.9279		Inz 78		Tan Ataram	West Hoggar	IOGU	Cpx-gneiss	Sm-Nd TDM	Whole Rock	3507			3507	Archean	Ouzzalian Orogeny	Archean	Peucat et al., 1996
415	2.69544	22.9279		Inz 69		Tan Ataram	West Hoggar	IOGU	Cpx-gneiss	Sm-Nd TDM	Whole Rock	3426			3426	Archean	Ouzzalian Orogeny	Archean	Peucat et al., 1996
416	2.69544	22.9279		Inz 68		Tan Ataram	West Hoggar	IOGU	Cpx-gneiss	Sm-Nd TDM	Whole Rock	3498			3498	Archean	Ouzzalian Orogeny	Archean	Peucat et al., 1996
417	2.69544	22.9279		Inz 70		Tan Ataram	West Hoggar	IOGU	Cpx-gneiss	Sm-Nd TDM	Whole Rock	3361			3361	Archean	Ouzzalian Orogeny	Archean	Peucat et al., 1996
418	2.69544	22.9279		Inz 75		Tan Ataram	West Hoggar	IOGU	Cpx-gneiss	Sm-Nd TDM	Whole Rock	3428			3428	Archean	Ouzzalian Orogeny	Archean	Peucat et al., 1996
419	2.69544	22.9279		Inz 71		Tan Ataram	West Hoggar	IOGU	Charnockite	Sm-Nd TDM	Whole Rock	3313			3313	Archean	Ouzzalian Orogeny	Archean	Peucat et al., 1996
420	2.89509	23.2532		Inz 15	Opx-bearing calc-alkaline granodioritic gneiss	Tin Tchik Tchik	West Hoggar	IOGU	Charnockite	Pb-Pb CAMECA	Zircon	2467			2467	Paleo-proterozoic	Liberian Orogeny	Archean	Peucat et al., 1996
421	2.89509	23.2532		Inz 15		Tin Tchik Tchik	West Hoggar	IOGU	Charnockite	Sm-Nd TDM	Whole Rock	3110			3110	Archean	Ouzzalian Orogeny	Archean	Peucat et al., 1996
422	2.89509	23.2532		Inz 88		Tin Tchik Tchik	West Hoggar	IOGU	Charnockite	Sm-Nd TDM	Whole Rock	3100			3100	Archean	Ouzzalian Orogeny	Archean	Peucat et al., 1996
423	2.89509	23.2532		Inz 86		Tin Tchik Tchik	West Hoggar	IOGU	Charnockite			N/D			N/D				Peucat et al., 1996
424	2.89509	23.2532		Inz 89	Opx-bearing calc-alkaline granodioritic gneiss	Tin Tchik Tchik	West Hoggar	IOGU	Charnockite	U-Pb	Zircon	2440			2440	Paleo-proterozoic	Eburnean Orogeny	Eburnean Orogeny	Peucat et al., 1996
425	2.89509	23.2532		Inz 89	Opx-bearing calc-alkaline granodioritic gneiss	Tin Tchik Tchik	West Hoggar	IOGU	Charnockite	U-Pb	Zircon	2050			2050	Paleo-proterozoic	Eburnean Orogeny	Eburnean Orogeny	Peucat et al., 1996
426	2.89509	23.2532		Inz 89	Opx-bearing calc-alkaline granodioritic gneiss	Tin Tchik Tchik	West Hoggar	IOGU	Charnockite	U-Pb	Zircon	2940			2940	Archean	Ouzzalian Orogeny	Archean	Peucat et al., 1996
427	2.89509	23.2532		Inz 89	Opx-bearing calc-alkaline granodioritic gneiss	Tin Tchik Tchik	West Hoggar	IOGU	Charnockite	U-Pb	Zircon	2790			2790	Archean	Ouzzalian Orogeny	Archean	Peucat et al., 1996
428	2.89509	23.2532		Inz 89	Opx-bearing calc-alkaline granodioritic gneiss	Tin Tchik Tchik	West Hoggar	IOGU	Charnockite	U-Pb	Zircon	2500			2500	Archean	Liberian Orogeny	Archean	Peucat et al., 1996
429	2.89509	23.2532		Inz 89	Opx-bearing calc-alkaline granodioritic gneiss	Tin Tchik Tchik	West Hoggar	IOGU	Charnockite	U-Pb	Zircon	2400			2400	Paleo-proterozoic	Eburnean Orogeny	Eburnean Orogeny	Peucat et al., 1996
430	2.89509	23.2532		Inz 89	Opx-bearing calc-alkaline granodioritic gneiss	Tin Tchik Tchik	West Hoggar	IOGU	Charnockite	U-Pb ID-TIMS	Zircon	2919	27		2919±27	Archean	Ouzzalian Orogeny	Archean	Peucat et al., 1996
431	2.89509	23.2532		Inz 89	Opx-bearing calc-alkaline granodioritic gneiss	Tin Tchik Tchik	West Hoggar	IOGU	Charnockite	U-Pb ID-TIMS	Zircon	2540			2540	Archean	Liberian Orogeny	Archean	Peucat et al., 1996
432	2.89509	23.2532		Inz 89	Opx-bearing calc-alkaline granodioritic gneiss	Tin Tchik Tchik	West Hoggar	IOGU	Charnockite	U-Pb ID-TIMS	Zircon	2500			2500	Archean	Liberian Orogeny	Archean	Peucat et al., 1996
433	2.89509	23.2532		Inz 89	Opx-bearing calc-alkaline granodioritic gneiss	Tin Tchik Tchik	West Hoggar	IOGU	Charnockite	U-Pb ID-TIMS	Zircon	2000			2000	Paleo-proterozoic	Eburnean Orogeny	Eburnean Orogeny	Peucat et al., 1996
434	2.89509	23.2532		Inz 89	Opx-bearing calc-alkaline granodioritic gneiss	Tin Tchik Tchik	West Hoggar	IOGU	Charnockite	U-Pb ID-TIMS	Zircon	1960			1960	Paleo-proterozoic	Eburnean Orogeny	Eburnean Orogeny	Peucat et al., 1996
435	2.89509	23.2532		Inz 89	Opx-bearing calc-alkaline granodioritic gneiss	Tin Tchik Tchik	West Hoggar	IOGU	Charnockite	U-Pb ID-TIMS	Zircon	1900			1900	Paleo-proterozoic	Eburnean Orogeny	Eburnean Orogeny	Peucat et al., 1996
436	2.89509	23.2532		Inz 89	Opx-bearing calc-alkaline granodioritic gneiss	Tin Tchik Tchik	West Hoggar	IOGU	Charnockite	U-Pb ID-TIMS	Zircon	2000			2000	Paleo-proterozoic	Eburnean Orogeny	Eburnean Orogeny	Peucat et al., 1996
437	2.89509	23.2532		Inz 89	Opx-bearing calc-alkaline granodioritic gneiss	Tin Tchik Tchik	West Hoggar	IOGU	Charnockite	Pb-Pb CAMECA	Zircon	2711			2711	Archean	Ouzzalian Orogeny	Archean	Peucat et al., 1996
438	2.89509	23.2532		Inz 89	Opx-bearing calc-alkaline granodioritic gneiss	Tin Tchik Tchik	West Hoggar	IOGU	Charnockite	Pb-Pb CAMECA	Zircon	2943			2943	Archean	Ouzzalian Orogeny	Archean	Peucat et al., 1996
439	2.89509	23.2532		Inz 89	Opx-bearing calc-alkaline granodioritic gneiss	Tin Tchik Tchik	West Hoggar	IOGU	Charnockite	Pb-Pb CAMECA	Zircon	2319			2319	Paleo-proterozoic	Eburnean Orogeny	Eburnean Orogeny	Peucat et al., 1996
440	2.89509	23.2532		Inz 89	Opx-bearing calc-alkaline granodioritic gneiss	Tin Tchik Tchik	West Hoggar	IOGU	Charnockite	Pb-Pb CAMECA	Zircon	2304			2304	Paleo-proterozoic	Eburnean Orogeny	Eburnean Orogeny	Peucat et al., 1996
441	2.89509	23.2532		Inz 89	Opx-bearing calc-alkaline granodioritic gneiss	Tin Tchik Tchik	West Hoggar	IOGU	Charnockite	Pb-Pb CAMECA	Zircon	2375			2375	Paleo-proterozoic	Eburnean Orogeny	Eburnean Orogeny	Peucat et al., 1996
442	2.89509	23.2532		Inz 89	Opx-bearing calc-alkaline granodioritic gneiss	Tin Tchik Tchik	West Hoggar	IOGU	Charnockite	Pb-Pb CAMECA	Zircon	2061			2061	Paleo-proterozoic	Eburnean Orogeny	Eburnean Orogeny	Peucat et al., 1996
443	2.89509	23.2532		Inz 89	Opx-bearing calc-alkaline granodioritic gneiss	Tin Tchik Tchik	West Hoggar	IOGU	Charnockite	Pb-Pb CAMECA	Zircon	2212			2212	Paleo-proterozoic	Eburnean Orogeny	Eburnean Orogeny	Peucat et al., 1996
444	2.89509	23.2532		Inz 89		Tin Tchik Tchik	West Hoggar	IOGU	Charnockite	Sm-Nd TDM	Whole Rock	3068			3068	Archean	Ouzzalian Orogeny	Archean	Peucat et al., 1996
445	2.89889	22.9542		Inz 79		Tan Afella	West Hoggar	IOGU	Charnockite			N/D			N/D				Peucat et al., 1996
446	2.72396	23.4226		Inz 40		In Roccan	West Hoggar	IOGU	Charnockite	Sm-Nd TDM	Whole Rock	3533			3533	Archean	Ouzzalian Orogeny	Archean	Peucat et al., 1996
447	2.72396	23.4226		Inz 35		In Roccan	West Hoggar	IOGU	Charnockite	Sm-Nd TDM	Whole Rock	3577			3577	Archean	Ouzzalian Orogeny	Archean	Peucat et al., 1996
448	2.72396	23.4226		Inz 41		In Roccan	West Hoggar	IOGU	Gr-charnockite	Sm-Nd TDM	Whole Rock	3583			3583	Archean	Ouzzalian Orogeny	Archean	Peucat et al., 1996
449	2.89889	22.9542		Inz 84		Tan Afella	West Hoggar	IOGU	Gr-charnockite	Sm-Nd TDM	Whole Rock	3419			3419	Archean	Ouzzalian Orogeny	Archean	Peucat et al., 1996
450	2.89889	22.9542		Inz 81	Opx-bearing calc-alkaline monzogranitic gneiss	Tan Afella	West Hoggar	IOGU	Charnockite	Pb-Pb CAMECA	Zircon	2514			2514	Archean	Liberian Orogeny	Archean	Peucat et al., 1996
451	2.89889	22.9542		Inz 81	Opx-bearing calc-alkaline monzogranitic gneiss	Tan Afella	West Hoggar	IOGU	Charnockite	Pb-Pb CAMECA	Zircon	2572			2572	Archean	Liberian Orogeny	Archean	Peucat et al., 1996
452	2.89889	22.9542		Inz 81	Opx-bearing calc-alkaline monzogranitic gneiss	Tan Afella	West Hoggar	IOGU	Charnockite	Pb-Pb CAMECA	Zircon	2772			2772	Archean	Ouzzalian Orogeny	Archean	Peucat et al., 1996
453	2.89889	22.9542		Inz 81	Opx-bearing calc-alkaline monzogranitic gneiss	Tan Afella	West Hoggar	IOGU	Charnockite	Pb-Pb CAMECA	Zircon	2253			2253	Paleo-proterozoic	Eburnean Orogeny	Eburnean Orogeny	Peucat et al., 1996
454	2.89889	22.9542		Inz 81	Opx-bearing calc-alkaline monzogranitic gneiss	Tan Afella	West Hoggar	IOGU	Charnockite	Pb-Pb CAMECA	Zircon	2304			2304	Paleo-proterozoic	Eburnean Orogeny	Eburnean Orogeny	Peucat et al., 1996
455	2.89889	22.9542		Inz 81	Opx-bearing calc-alkaline monzogranitic gneiss	Tan Afella	West Hoggar	IOGU	Charnockite	Pb-Pb CAMECA	Zircon	2401			2401	Paleo-proterozoic	Eburnean Orogeny	Eburnean Orogeny	Peucat et al., 1996
456	2.89889	22.9542		Inz 81		Tan Afella	West Hoggar	IOGU	Charnockite	Sm-Nd TDM	Whole Rock	3154			3154	Archean	Ouzzalian Orogeny	Archean	Peucat et al., 1996
457	2.89889	22.9542		Inz 82		Tan Afella	West Hoggar	IOGU	Charnockite	Sm-Nd TDM	Whole Rock	3049			3049	Archean	Ouzzalian Orogeny	Archean	Peucat et al., 1996
458	2.80762	23.4104		Inz 9		Alouki	West Hoggar	IOGU	Crd-gneiss	U-Pb ID-TIMS	Muscovite	2900			2900	Archean	Ouzzalian Orogeny	Archean	Peucat et al., 1996
459	2.89889	22.9542		Inz 80		Tan Afella	West Hoggar	IOGU	Crd-gneiss	U-Pb ID-TIMS	Muscovite	2250			2250	Paleo-proterozoic	Eburnean Orogeny	Eburnean Orogeny	Peucat et al., 1996
460	2.89889	22.9542		Inz 80		Tan Afella	West Hoggar	IOGU	Crd-gneiss	U-Pb SHRIMP	Zircon	1983	15		1983±15	Paleo-proterozoic	Eburnean Orogeny	Eburnean Orogeny	Peucat et al., 1996
461	2.89889	22.9542		Inz 80		Tan Afella	West Hoggar	IOGU	Crd-gneiss	U-Pb SHRIMP	Zircon	2000			2000	Paleo-proterozoic	Eburnean Orogeny	Eburnean Orogeny	Peucat et al., 1996
462	2.89889	22.9542		Inz 80		Tan Afella	West Hoggar	IOGU	Crd-gneiss	U-Pb SHRIMP	Zircon	2510			2510	Archean	Liberian Orogeny	Archean	Peucat et al., 1996
463	2.89889	22.9542		Inz 80		Tan Afella	West Hoggar	IOGU	Crd-gneiss	Sm-Nd TDM	Whole Rock	2659			2659	Archean	Liberian Orogeny	Archean	Peucat et al., 1996
464	2.89509	23.2532		Inz 91	Opx enigmatic gneisses	Tin Tchik Tchik	West Hoggar	IOGU	Charnockite	U-Pb	Zircon	3440			3440	Archean	Ouzzalian Orogeny	Archean	Peucat et al., 1996
465	2.89509	23.2532		Inz 91	Opx enigmatic gneisses	Tin Tchik Tchik	West Hoggar	IOGU	Charnockite	U-Pb	Zircon	3000			3000	Archean	Ouzzalian Orogeny	Archean	Peucat et al., 1996
466	2.89509	23.2532		Inz 91	Opx enigmatic gneisses	Tin Tchik Tchik	West Hoggar	IOGU	Charnockite	U-Pb SHRIMP	Zircon	3270	11		3270±11	Archean	Ouzzalian Orogeny	Archean	Peucat et al., 1996
467	2.89509	23.2532		Inz 91	Opx enigmatic gneisses	Tin Tchik Tchik	West Hoggar	IOGU	Charnockite	U-Pb SHRIMP	Zircon	3200			3200	Archean	Ouzzalian Orogeny	Archean	Peucat et al., 1996
468	2.89509	23.2532		Inz 91	Opx enigmatic gneisses	Tin Tchik Tchik	West Hoggar	IOGU	Charnockite	U-Pb SHRIMP	Zircon	3100			3100	Archean	Ouzzalian Orogeny	Archean	Peucat et al., 1996
469	2.89509	23.2532		Inz 91	Opx enigmatic gneisses	Tin Tchik Tchik	West Hoggar	IOGU	Charnockite	U-Pb SHRIMP	Zircon	3000			3000	Archean	Ouzzalian Orogeny	Archean	Peucat et al., 1996
470	2.89509	23.2532		Inz 91	Opx enigmatic gneisses	Tin Tchik Tchik	West Hoggar	IOGU	Charnockite	U-Pb SHRIMP	Zircon	2800			2800	Archean	Ouzzalian Orogeny	Archean	Peucat et al., 1996
471	2.89509	23.2532		Inz 91	Opx enigmatic gneisses	Tin Tchik Tchik	West Hoggar	IOGU	Charnockite	U-Pb SHRIMP	Zircon	2700			2700	Archean	Liberian Orogeny	Archean	Peucat et al., 1996
472	2.89509	23.2532		Inz 91	Opx enigmatic gneisses	Tin Tchik Tchik	West Hoggar	IOGU	Charnockite	U-Pb SHRIMP	Zircon	2600			2600	Archean	Liberian Orogeny	Archean	Peucat et al., 1996
473	2.89509	23.2532		Inz 91	Opx enigmatic gneisses	Tin Tchik Tchik	West Hoggar	IOGU	Charnockite	U-Pb SHRIMP	Zircon	2500			2500	Archean	Liberian Orogeny	Archean	Peucat et al., 1996
474	2.89509	23.2532		Inz 91	Opx enigmatic gneisses	Tin Tchik Tchik	West Hoggar	IOGU	Charnockite	U-Pb ID-TIMS	Zircon	700			700	Neo-proterozoic	(750-665 Ma) Pan-African Orogeny	Pan-African Orogeny	Peucat et al., 1996
475	2.89509	23.2532		Inz 91	Opx enigmatic gneisses	Tin Tchik Tchik	West Hoggar	IOGU	Charnockite	U-Pb ID-TIMS	Zircon	3050			3050	Archean	Ouzzalian Orogeny	Archean	Peucat et al., 1996
476	2.89509	23.2532		Inz 91	Opx enigmatic gneisses	Tin Tchik Tchik	West Hoggar	IOGU	Charnockite	Pb-Pb CAMECA	Zircon	3002			3002	Archean	Ouzzalian Orogeny	Archean	Peucat et al., 1996
477	2.89509	23.2532		Inz 91	Opx enigmatic gneisses	Tin Tchik Tchik	West Hoggar	IOGU	Charnockite	Pb-Pb CAMECA	Zircon	3088			3088	Archean	Ouzzalian Orogeny	Archean	Peucat et al., 1996
478	2.89509	23.2532		Inz 91	Opx enigmatic gneisses	Tin Tchik Tchik	West Hoggar	IOGU	Charnockite	Pb-Pb CAMECA	Zircon	3143			3143	Archean	Ouzzalian Orogeny	Archean	Peucat et al., 1996
479	2.89509	23.2532		Inz 91	Opx enigmatic gneisses	Tin Tchik Tchik	West Hoggar	IOGU	Charnockite	Sm-Nd TDM	Whole Rock	3192			3192	Archean	Ouzzalian Orogeny	Archean	Peucat et al., 1996
480	3.11756	23.4819		INH 635		Ihouhaouene	West Hoggar	IOGU	Metasediment	U-Pb SHRIMP	Zircon	2000			2000	Paleo-proterozoic	Eburnean Orogeny	Eburnean Orogeny	Peucat et al., 1996
481	3.11756	23.4819		INH 635		Ihouhaouene	West Hoggar	IOGU	Metasediment	U-Pb SHRIMP	Zircon	3100			3100	Archean	Ouzzalian Orogeny	Archean	Peucat et al., 1996
482	3.11756	23.4819		INH 635		Ihouhaouene	West Hoggar	IOGU	Metasediment	U-Pb SHRIMP	Zircon	2900			2900	Archean	Ouzzalian Orogeny	Archean	Peucat et al., 1996
483	3.11756	23.4819		INH 635		Ihouhaouene	West Hoggar	IOGU	Metasediment	U-Pb SHRIMP	Zircon	2700			2700	Archean	Liberian Orogeny	Archean	Peucat et al., 1996
484	3.11756	23.4819		INH 635		Ihouhaouene	West Hoggar	IOGU	Metasediment	U-Pb	Zircon	2800			2800	Archean	Ouzzalian Orogeny	Archean	Peucat et al., 1996
485	3.11756	23.4819		INH 635		Ihouhaouene	West Hoggar	IOGU	Metasediment	U-Pb	Zircon	2000			2000	Paleo-proterozoic	Eburnean Orogeny	Eburnean Orogeny	Peucat et al., 1996
486	3.11756	23.4819		INH 635		Ihouhaouene	West Hoggar	IOGU	Metasediment	U-Pb ID-TIMS	Muscovite	2200			2200	Paleo-proterozoic	Eburnean Orogeny	Eburnean Orogeny	Peucat et al., 1996
487	3.11756	23.4819		INH 635		Ihouhaouene	West Hoggar	IOGU	Metasediment	U-Pb ID-TIMS	Muscovite	2100			2100	Paleo-proterozoic	Eburnean Orogeny	Eburnean Orogeny	Peucat et al., 1996
488	3.11756	23.4819		INH 635		Ihouhaouene	West Hoggar	IOGU	Metasediment	Pb-Pb CAMECA	Zircon	2026			2026	Paleo-proterozoic	Eburnean Orogeny	Eburnean Orogeny	Peucat et al., 1996
489	3.11756	23.4819		INH 635		Ihouhaouene	West Hoggar	IOGU	Metasediment	Pb-Pb CAMECA	Zircon	2517			2517	Archean	Liberian Orogeny	Archean	Peucat et al., 1996
490	3.11756	23.4819		INH 635		Ihouhaouene	West Hoggar	IOGU	Metasediment	Pb-Pb CAMECA	Zircon	2748			2748	Archean	Ouzzalian Orogeny	Archean	Peucat et al., 1996
491	3.11756	23.4819		INH 635		Ihouhaouene	West Hoggar	IOGU	Metasediment	Pb-Pb CAMECA	Zircon	2300			2300	Paleo-proterozoic	Eburnean Orogeny	Eburnean Orogeny	Peucat et al., 1996
492	2.79431	22.9016		INZ 105		Khanfuss	West Hoggar	IOGU	Metasediment			N/D			N/D				Peucat et al., 1996
493	2.80762	23.4104		TH 14 TR		Alouki	West Hoggar	IOGU	Garnet	Sm-Nd	Garnet	1974	30		1974±30	Paleo-proterozoic	Eburnean Orogeny	Eburnean Orogeny	Peucat et al., 1996
494	2.80762	23.4104		TH 14 TR		Alouki	West Hoggar	IOGU	Biotite	Rb-Sr	Biotite	1696	34		1696±34	Paleo-proterozoic	Eburnean Orogeny	Eburnean Orogeny	Peucat et al., 1996
495	2.79431	22.9016		INZ98 TR		Khanfuss	West Hoggar	IOGU	Biotite	Rb-Sr	Biotite	1814	41		1814±41	Paleo-proterozoic	Eburnean Orogeny	Eburnean Orogeny	Peucat et al., 1996
496	2.72396	23.4226		INZ37 TR		O Roccan	West Hoggar	IOGU	Garnet	Sm-Nd	Garnet	1965	49		1965±49	Paleo-proterozoic	Eburnean Orogeny	Eburnean Orogeny	Peucat et al., 1996
497	2.79431	22.9016		INZ 102 TR		Khanfuss	West Hoggar	IOGU	Garnet	Sm-Nd	Garnet	2002	35		2002±35	Paleo-proterozoic	Eburnean Orogeny	Eburnean Orogeny	Peucat et al., 1996
498	2.79431	22.9016		INZ 102 TR		Khanfuss	West Hoggar	IOGU	rutile	Sm-Nd	Rutile	1952			1952	Paleo-proterozoic	Eburnean Orogeny	Eburnean Orogeny	Peucat et al., 1996
499	2.79431	22.9016		INZ 102 TR		Khanfuss	West Hoggar	IOGU	sillimanite	Sm-Nd	Sillimanite	1950	26		1950±26	Paleo-proterozoic	Eburnean Orogeny	Eburnean Orogeny	Peucat et al., 1996
500	3.29843	23.637		INH 545		Ihouhaouene	West Hoggar	IOGU	Carbonatite	Fission Track	Apatite	255.9	4.6		255,9±4,6	Permian	Permian "Hercynian"	Hercyniann Orogeny	Carpena et al., 1988
501	3.06455	23.5542		INH 171 A		Ihouhaouene	West Hoggar	IOGU	Carbonatite	Fission Track	Apatite	248.5	3.7		248,5±3,7	Triassic	Triassic "Hercynian"	Hercyniann Orogeny	Carpena et al., 1988
502	3.06455	23.5542		INH 171 B		Ihouhaouene	West Hoggar	IOGU	Carbonatite	Fission Track	Apatite	263.5	4.2		263,5 ± 4,2	Permian	Permian "Hercynian"	Hercyniann Orogeny	Carpena et al., 1988
503	3.05314	23.5769		INH 181		Ihouhaouene	West Hoggar	IOGU	Carbonatite	Fission Track	Apatite	246.8	8.5		246,8±8,5	Triassic	Triassic "Hercynian"	Hercyniann Orogeny	Carpena et al., 1988
504	3.36878	23.6535		INH 642		Ihouhaouene	West Hoggar	IOGU	Carbonatite	Fission Track	Apatite	500.6	16.4		500,6 ± 16,4	Cambrian	(520-480 Ma) Pan-African Orogeny	Post Pan-African Orogeny	Carpena et al., 1988
505	3.38019	23.6814		INH 693		Ihouhaouene	West Hoggar	IOGU	Carbonatite	Fission Track	Apatite	628.3	33.1		628,3 ± 33,1	Neo-proterozoic	(650-570 Ma) Pan-African Orogeny	Pan-African Orogeny	Carpena et al., 1988
506	3.38114	23.6901		INH 690		Ihouhaouene	West Hoggar	IOGU	Carbonatite	Fission Track	Apatite	547.1	14.4		547,1 ± 14,4	Neo-proterozoic	(560-520 Ma) Pan-African Orogeny	Pan-African Orogeny	Carpena et al., 1988
507	1.67738	23.5714					West Hoggar	Tassendjanet		Fission Track	Apatite	243			243	Triassic	Triassic "Hercynian"	Hercyniann Orogeny	Carpena, 1982
508	1.84375	22.9162					West Hoggar	Tassendjanet		Fission Track	Zircon	559			559	Neo-proterozoic	(560-520 Ma) Pan-African Orogeny	Pan-African Orogeny	Carpena, 1982
509	2.11708	23.0147					West Hoggar	Tassendjanet		Fission Track	Apatite	194			194	Jurassic	Jurassic Pangea break-up (CAMP)	Jurassic Pangea break-up (CAMP)	Carpena, 1982
510	1.23767	20.5652					West Hoggar	Kidal		Fission Track	Zircon	631			631	Neo-proterozoic	(650-570 Ma) Pan-African Orogeny	Pan-African Orogeny	Carpena, 1982
511	1.7368	19.0446					West Hoggar	IGU		Fission Track	Zircon	534			534	Cambrian	(560-520 Ma) Pan-African Orogeny	Post Pan-African Orogeny	Carpena, 1982
512	1.95071	20.0972					West Hoggar	IGU		Fission Track	Zircon	1317			1317	Meso-protezozoic	(1600-1200) Pre-Pan-African	Ante-Pan-African	Carpena, 1982
513	4.63649	21.9826					LATEA metacraton	Iskel		Fission Track	Apatite	151			151	Jurassic	Jurassic Pangea break-up (CAMP)	Jurassic Pangea break-up (CAMP)	Carpena, 1982
514	4.75533	22.6642					LATEA metacraton	Iskel		Fission Track	Zircon	860			860	Neo-proterozoic	(870-840 Ma) Pan-African Rifting	Pan-African Oceanization	Carpena, 1982
515	4.75533	22.6642					LATEA metacraton	Iskel		Fission Track	Zircon	865			865	Neo-proterozoic	(870-840 Ma) Pan-African Rifting	Pan-African Oceanization	Carpena, 1982
516	6.03927	24.0732					LATEA metacraton	Egéré-Aleskod		Fission Track	Apatite	236			236	Triassic	Triassic "Hercynian"	Hercyniann Orogeny	Carpena, 1982
517	6.03927	24.0732					LATEA metacraton	Egéré-Aleskod		Fission Track	Zircon	526			526	Cambrian	(560-520 Ma) Pan-African Orogeny	Post Pan-African Orogeny	Carpena, 1982
518	6.58594	23.5208					LATEA metacraton	Egéré-Aleskod		Fission Track	Apatite	128			128	Cretaceous	Cretaceaous	Cretaceaous	Carpena, 1982
519	6.58594	23.5208					LATEA metacraton	Egéré-Aleskod		Fission Track	Zircon	585			585	Neo-proterozoic	(650-570 Ma) Pan-African Orogeny	Pan-African Orogeny	Carpena, 1982
520	13.2129	27.5964		TG 3	375-380	Gargaf		Murzuq		Fission Track	Apatite	228	26		228±26	Triassic	Triassic "Hercynian"	Hercyniann Orogeny	Glover, 1999
521	13.441	27.5459		TG 12	380	Gargaf		Murzuq		Fission Track	Apatite	241	34		241±34	Triassic	Triassic "Hercynian"	Hercyniann Orogeny	Glover, 1999
522	10.7671	25.3564		TG13	375	Tihemboka		Murzuq		Fission Track	Apatite	119	11		119±11	Cretaceous	Cretaceaous	Cretaceaous	Glover, 1999
523	10.9525	25.3048		TG 14	395	Tihemboka		Murzuq		Fission Track	Apatite	304	36		304±36	Carboniferous	Carboniferous "Hercynian"	Hercyniann Orogeny	Glover, 1999
524	12.7066	27.956		TG 28	Ordovician	Gargaf		Murzuq		Fission Track	Apatite	209	34		209±34	Triassic	Triassic "Hercynian"	Hercyniann Orogeny	Glover, 1999
525	-7.41428	30.541		GK230	Tamazzara Granite	Zenaga	Anti-Atlas	Sirwa inlier	Granite	U-Pb SHRIMP	Zircon	2037	9		2037±9	Paleo-proterozoic	Eburnean Orogeny	Eburnean Orogeny	Thomas et al., 2002
526	-7.41428	30.541		GK230	Tamazzara Granite	Zenaga	Anti-Atlas	Sirwa inlier	Granite	U-Pb SHRIMP	Zircon	2170			2170	Paleo-proterozoic	Eburnean Orogeny	Eburnean Orogeny	Thomas et al., 2002
527	-7.26675	30.5086		RTM247	Azguemerzi Granodiorite	Zenaga	Anti-Atlas	Sirwa inlier	Granodiorite	U-Pb SHRIMP	Zircon	2032	5		2032±5	Paleo-proterozoic	Eburnean Orogeny	Eburnean Orogeny	Thomas et al., 2002
528	-7.26675	30.5086		RTM247	Azguemerzi Granodiorite	Zenaga	Anti-Atlas	Sirwa inlier	Granodiorite	U-Pb SHRIMP	Zircon	2170			2170	Paleo-proterozoic	Eburnean Orogeny	Eburnean Orogeny	Thomas et al., 2002
529	-7.35336	30.4877		RJM48	Assourg Tonalite	Zenaga	Anti-Atlas	Sirwa inlier	Tonalite	U-Pb SHRIMP	Zircon	2037	7		2037±7	Paleo-proterozoic	Eburnean Orogeny	Eburnean Orogeny	Thomas et al., 2002
530	-7.48281	30.8113		GM119	Iriri Migmatite	Bleida		Bou Azzer inlier	Migmatite	U-Pb SHRIMP	Zircon	743	14		743±14	Neo-proterozoic	(750-665 Ma) Pan-African Orogeny	Pan-African Orogeny	Thomas et al., 2002
531	-7.48281	30.8113		GM119	Iriri Migmatite	Bleida		Bou Azzer inlier	Migmatite	U-Pb SHRIMP	Zircon	663	13		663±13	Neo-proterozoic	(750-665 Ma) Pan-African Orogeny	Pan-African Orogeny	Thomas et al., 2002
532	-7.77976	30.7599		GM73	Tadmant Rhyolite	Sarhro		Tazigzaout inlier	Rhyolite	U-Pb SHRIMP	Zircon	606	6		606±6	Neo-proterozoic	(650-570 Ma) Pan-African Orogeny	Pan-African Orogeny	Thomas et al., 2002
533	-7.38192	30.4944		GM191	Tamriwine Rhyolite	Sarhro		Tazigzaout inlier	Rhyolite	U-Pb SHRIMP	Zircon	605	9		605±9	Neo-proterozoic	(650-570 Ma) Pan-African Orogeny	Pan-African Orogeny	Thomas et al., 2002
534	-7.65318	31.232		RJMI	Amlouggui Tonalite	Assarag		Tazigzaout inlier	Tonalite	U-Pb SHRIMP	Zircon	586	8		586±8	Neo-proterozoic	(650-570 Ma) Pan-African Orogeny	Pan-African Orogeny	Thomas et al., 2002
535	-7.77976	30.8227		RTM87	Askanoun Granodiorite	Assarag		Tazigzaout inlier	Granodiorite	U-Pb SHRIMP	Zircon	575	8		575±8	Neo-proterozoic	(650-570 Ma) Pan-African Orogeny	Pan-African Orogeny	Thomas et al., 2002
536	-7.6646	31.1102		GM58	Tourcht Diorite	Assarag		Tazigzaout inlier	Diorite	U-Pb SHRIMP	Zircon	579	7		579±7	Neo-proterozoic	(650-570 Ma) Pan-African Orogeny	Pan-African Orogeny	Thomas et al., 2002
537	-7.71599	30.6247		CBM68	Mzil Granite	Assarag		Tazigzaout inlier	Granite	U-Pb SHRIMP	Zircon	614	10		614±10	Neo-proterozoic	(650-570 Ma) Pan-African Orogeny	Pan-African Orogeny	Thomas et al., 2002
538	-7.71599	30.6247		CBM68	Mzil Granite	Assarag		Tazigzaout inlier	Granite	U-Pb SHRIMP	Zircon	610	10		610±10	Neo-proterozoic	(650-570 Ma) Pan-African Orogeny	Pan-African Orogeny	Thomas et al., 2002
539	-7.35908	30.2431		CM7	Aguins Member	Ouarzazate		Tazigzaout inlier	Rhyolite	U-Pb SHRIMP	Zircon	577	6		577±6	Neo-proterozoic	(650-570 Ma) Pan-African Orogeny	Pan-African Orogeny	Thomas et al., 2002
540	-7.40952	30.9227		GK313	Tikhfist Formation	Ouarzazate		Tazigzaout inlier	Rhyolite	U-Pb SHRIMP	Zircon	571	8		571±8	Neo-proterozoic	(650-570 Ma) Pan-African Orogeny	Pan-African Orogeny	Thomas et al., 2002
541	-7.37145	30.5181		GM220	Tilsakht Granite	Ouarzazate		Tazigzaout inlier	Granite	U-Pb SHRIMP	Zircon	579	7		579±7	Neo-proterozoic	(650-570 Ma) Pan-African Orogeny	Pan-African Orogeny	Thomas et al., 2002
542	-7.37145	30.5181		GM220	Tilsakht Granite	Ouarzazate		Tazigzaout inlier	Granite	U-Pb SHRIMP	Zircon	625	8		625±8	Neo-proterozoic	(650-570 Ma) Pan-African Orogeny	Pan-African Orogeny	Thomas et al., 2002
543	-7.37145	30.5181		GM220	Tilsakht Granite	Ouarzazate		Tazigzaout inlier	Granite	U-Pb SHRIMP	Zircon	2060	10		2060±10	Paleo-proterozoic	Eburnean Orogeny	Eburnean Orogeny	Thomas et al., 2002
544	-7.89112	30.9388		GM51	Imourkhsane Granite	Ouarzazate		Tazigzaout inlier	Granite	U-Pb SHRIMP	Zircon	562	5		562±5	Neo-proterozoic	(560-520 Ma) Pan-African Orogeny	Pan-African Orogeny	Thomas et al., 2002
545	-7.65127	30.7951		RTM154	Tazoult Quartz Porphyr	Ouarzazate		Tazigzaout inlier	Granite	U-Pb SHRIMP	Zircon	559	6		559±6	Neo-proterozoic	(560-520 Ma) Pan-African Orogeny	Pan-African Orogeny	Thomas et al., 2002
546	-7.65127	30.7951		RTM154	Tazoult Quartz Porphyr	Ouarzazate		Zenaga inlier	Granite	U-Pb SHRIMP	Zircon	625	13		625±13	Neo-proterozoic	(650-570 Ma) Pan-African Orogeny	Pan-African Orogeny	Thomas et al., 2002
547	-7.65127	30.7951		RTM154	Tazoult Quartz Porphyr	Ouarzazate		Zenaga inlier	Granite	U-Pb SHRIMP	Zircon	2045	10		2045±10	Paleo-proterozoic	Eburnean Orogeny	Eburnean Orogeny	Thomas et al., 2002
548	-7.65127	30.7951		RTM154	Tazoult Quartz Porphyr	Ouarzazate		Zenaga inlier	Granite	U-Pb SHRIMP	Zircon	1100	127		1100±127	Meso-protezozoic	(1100-870 Ma) Pan-African Rifting-Oceanization	Pan-African Oceanization	Thomas et al., 2002
549	-6.46582	30.3615		#00-09	Bleïda granodiorite		Anti-Atlas	Zenaga inlier	Granodiorite	U-Pb	Zircon	579	1.2		579±1,2	Neo-proterozoic	(650-570 Ma) Pan-African Orogeny	Pan-African Orogeny	Inglis et al., 2004
550	-6.46746	30.3639		#99-18	Bleïda granodiorite		Anti-Atlas	Zenaga inlier	Granodiorite	U-Pb	Zircon	578	1.2		578±1,2	Neo-proterozoic	(650-570 Ma) Pan-African Orogeny	Pan-African Orogeny	Inglis et al., 2004
551	-4.9113	31.4281		BM7	Bou Madine rhyolitic dome	Ougnat		Zenaga inlier	Rhyolite	U-Pb SIMS	Zircon	552	5		552±5	Neo-proterozoic	(560-520 Ma) Pan-African Orogeny	Pan-African Orogeny	Gasquet et al., 2005
552	-4.9113	31.4281		BM7	Bou Madine rhyolitic dome	Ougnat		Zenaga inlier	Rhyolite	U-Pb SIMS	Zircon	2100			2100	Paleo-proterozoic	Eburnean Orogeny	Eburnean Orogeny	Gasquet et al., 2005
553	-5.65476	31.3484		IM74	Tachkakacht rhyolitic dyke	Saghro–Imiter		Zenaga inlier	Rhyolite	U-Pb SIMS	Zircon	543	9		543±9	Neo-proterozoic	(560-520 Ma) Pan-African Orogeny	Pan-African Orogeny	Gasquet et al., 2005
554	-6.79762	30.5288		BA06	Aghbar trachytic sill	Bou Azzer		Zenaga inlier	Trachyte	U-Pb SIMS	Zircon	531	5		531±5	Cambrian	(560-520 Ma) Pan-African Orogeny	Post Pan-African Orogeny	Gasquet et al., 2005
555	-6.79762	30.5288		BA06	Aghbar trachytic sill	Bou Azzer		Zenaga inlier	Trachyte	U-Pb SIMS	Zircon	1600			1600	Meso-protezozoic	Eburnean Orogeny	Eburnean Orogeny	Gasquet et al., 2005
556	-6.79762	30.5288		BA06	Aghbar trachytic sill	Bou Azzer		Zenaga inlier	Trachyte	U-Pb SIMS	Zircon	1800			1800	Paleo-proterozoic	Eburnean Orogeny	Eburnean Orogeny	Gasquet et al., 2005
557	-6.79571	30.4289			Jbel Boho Syenite	Jbel Boho		Zenaga inlier	Syenite	U-Pb SIMS	Zircon	529	3		529±3	Cambrian	(560-520 Ma) Pan-African Orogeny	Post Pan-African Orogeny	Ducrot and Lancelot, 1977
558	-5.65476	31.3484		IM 99-50		Imiter		Bou Azzer inlier	Granite-granodiorite	Sm-Nd	Whole Rock	1462			1462	Meso-protezozoic	(1600-1200) Pre-Pan-African	Ante-Pan-African	Gasquet et al., 2005
559	-5.65476	31.3484		IM 00-03		Imiter		Bou Azzer inlier	Granite-granodiorite	Sm-Nd	Whole Rock	1461			1461	Meso-protezozoic	(1600-1200) Pre-Pan-African	Ante-Pan-African	Gasquet et al., 2005
560	-5.65476	31.3484		SJ 127		Imiter		Bou Azzer inlier	Granite-granodiorite	Sm-Nd	Whole Rock	1305			1305	Meso-protezozoic	(1600-1200) Pre-Pan-African	Ante-Pan-African	Gasquet et al., 2005
561	-5.65476	31.3484		IM 99-72		Imiter		Bou Azzer inlier	Rhyolite	Sm-Nd	Whole Rock	1275			1275	Meso-protezozoic	(1600-1200) Pre-Pan-African	Ante-Pan-African	Gasquet et al., 2005
562	-5.65476	31.3484		IM 99-74		Imiter		Saghro inlier	Rhyolite	Sm-Nd	Whole Rock	1269			1269	Meso-protezozoic	(1600-1200) Pre-Pan-African	Ante-Pan-African	Gasquet et al., 2005
563	-5.65476	31.3484		IM 99-75		Imiter		Saghro inlier	Rhyolite	Sm-Nd	Whole Rock	1161			1161	Meso-protezozoic	(1600-1200) Pre-Pan-African	Ante-Pan-African	Gasquet et al., 2005
564	-5.65476	31.3484		IM 01-01		Imiter		Saghro inlier	Rhyolite	Sm-Nd	Whole Rock	1152			1152	Meso-protezozoic	(1600-1200) Pre-Pan-African	Ante-Pan-African	Gasquet et al., 2005
565	-8.59959	29.449		PC 330B		Tamazrar		Saghro inlier	Biotite magnetite granite	Pb Evaporation	Zircon	2049	2		2049±2	Paleo-proterozoic	Eburnean Orogeny	Eburnean Orogeny	Gasquet et al., 2004
566	-8.54177	29.4204		PC 415		Tamazrar		Saghro inlier	Porphyritic biotite granite	Pb Evaporation	Zircon	2046	2		2046±2	Paleo-proterozoic	Eburnean Orogeny	Eburnean Orogeny	Gasquet et al., 2004
567	-8.61815	29.4897		AKA 1		Tamazrar		Saghro inlier	Coarse-grained leucogranite	U-Pb SHRIMP	Zircon	2043	5		2043±5	Paleo-proterozoic	Eburnean Orogeny	Eburnean Orogeny	Gasquet et al., 2004
568	-8.61815	29.4897		AKA 1		Tamazrar		Tagragra de Tata inlier	Coarse-grained leucogranite	K-Ar	Muscovite	1543	22		1543±22	Meso-protezozoic	(1600-1200) Pre-Pan-African	Ante-Pan-African	Gasquet et al., 2004
569	-8.64742	29.4654		DG 162		Tamazrar		Tagragra de Tata inlier	Fine-grained leucogranite	U-Pb SHRIMP	Zircon	2046	8		2046±8	Paleo-proterozoic	Eburnean Orogeny	Eburnean Orogeny	Gasquet et al., 2004
570	-8.96222	29.4133		PC 344A	TAFELTAST	Sidi Bou addi		Tagragra de Tata inlier	Porphyritic biotite granite	U-Pb SHRIMP	Whole Rock	2046	3		2046±3	Paleo-proterozoic	Eburnean Orogeny	Eburnean Orogeny	Gasquet et al., 2004
571	-8.54677	29.4676		BT 126		Tamazrar		Tagragra de Tata inlier	Pegmatite	Electron microprobe	Monazite	1755	25		1755±25	Paleo-proterozoic	Eburnean Orogeny	Eburnean Orogeny	Gasquet et al., 2004
572	-8.54677	29.4676		BT 126		Tamazrar		Tagragra de Tata inlier	Pegmatite	K-Ar	Muscovite	1755	25		1755±25	Paleo-proterozoic	Eburnean Orogeny	Eburnean Orogeny	Gasquet et al., 2004
573	-8.70524	29.479		DG 169		Tamazrar		Saghro inlier	Dacite	U-Pb SHRIMP	Zircon	600	5		600±5	Neo-proterozoic	(650-570 Ma) Pan-African Orogeny	Pan-African Orogeny	Gasquet et al., 2004
574	-8.70524	29.479		DG 169		Tamazrar		Saghro inlier	Dacite	Electron microprobe	Monazite	388	26		388±26	Devonian	Devonian "Caledonian"	Caledonian Orogeny	Gasquet et al., 2004
575	-8.9558	29.4226		PC 427A	TAFELTAST	Sidi Bou addi		Saghro inlier	Porphyritic microgranite	Pb Evaporation	Zircon	1760	3		1760±3	Paleo-proterozoic	Eburnean Orogeny	Eburnean Orogeny	Gasquet et al., 2004
576	-8.72309	29.4618		DG 167		Tamazrar		Saghro inlier	Au, quartz-bearing vein	K-Ar	Muscovite	276	4		276±4	Permian	Permian "Hercynian"	Hercyniann Orogeny	Gasquet et al., 2004
577	-8.72309	29.4618		DG 167		Tamazrar		Saghro inlier	Au, quartz-bearing vein	40Ar-39Ar	Muscovite	301	7		301±7	Carboniferous	Carboniferous "Hercynian"	Hercyniann Orogeny	Gasquet et al., 2004
578	-6.32914	30.3976		AGEE298		Tichibanine		Saghro inlier	Rhyolite	U-Pb SHRIMP	Zircon	767	7		767±7	Neo-proterozoic	(840-750) Pan-African Rifting	Pan-African Oceanization	Blein et al., 2014
579	-6.47488	30.469		AGEE094		Tichibanine		Saghro inlier	Rhyolite	U-Pb SHRIMP	Zircon	761	7		761±7	Neo-proterozoic	(750-665 Ma) Pan-African Orogeny	Pan-African Oceanization	Blein et al., 2014
580	-6.9365	30.538		BOPC028		Assif n’Bougmmane		Saghro inlier	Orthogneiss	U-Pb SHRIMP	Zircon	755	9		755±9	Neo-proterozoic	(750-665 Ma) Pan-African Orogeny	Pan-African Oceanization	Blein et al., 2014
581	-6.58791	30.4398		AADG4				Saghro inlier	Orthogneiss	U-Pb SHRIMP	Zircon	754	5		754±5	Neo-proterozoic	(750-665 Ma) Pan-African Orogeny	Pan-African Oceanization	Blein et al., 2014
582	-6.63609	30.4535		AAPC140				Saghro inlier	Granitic intrusion	U-Pb SHRIMP	Zircon	702	5		702±5	Neo-proterozoic	(750-665 Ma) Pan-African Orogeny	Pan-African Orogeny	Blein et al., 2014
583	-6.78421	30.5267		BOPC 076				Saghro inlier	Granitic intrusion	U-Pb SHRIMP	Zircon	695	7		695±7	Neo-proterozoic	(750-665 Ma) Pan-African Orogeny	Pan-African Orogeny	Blein et al., 2014
584	-6.56947	30.482		ADG12		Bou Azzer		Saghro inlier	Plagiogranite	U-Pb SHRIMP	Zircon	658	8		658±8	Neo-proterozoic	(750-665 Ma) Pan-African Orogeny	Pan-African Orogeny	Blein et al., 2014
585	-6.90854	30.5058		ALDG21	welded tuff Tiddiline Group	Tiddiline		Saghro inlier	Rhyolite	U-Pb SHRIMP	Whole Rock	606	4		606±4	Neo-proterozoic	(650-570 Ma) Pan-African Orogeny	Pan-African Orogeny	Blein et al., 2014
586	-6.85857	30.4999		ALDG4	Trachyte Tiddiline Group	Tiddiline		Saghro inlier	Trachyte	U-Pb SHRIMP	Whole Rock	606	5		606±5	Neo-proterozoic	(650-570 Ma) Pan-African Orogeny	Pan-African Orogeny	Blein et al., 2014
587	-6.9014	30.5023		ALDG20	Rhyolitic welded tuff Ouarzazate Group	Ouarzazate		Saghro inlier	Rhyolite	U-Pb SHRIMP	Whole Rock	567	5		567±5	Neo-proterozoic	(650-570 Ma) Pan-African Orogeny	Pan-African Orogeny	Blein et al., 2014
588	-6.75923	30.6545		BODG6	Rhyolitic welded tuff Ouarzazate Grou	Ouarzazate		Saghro inlier	Rhyolite	U-Pb SHRIMP	Whole Rock	566	4		566±4	Neo-proterozoic	(650-570 Ma) Pan-African Orogeny	Pan-African Orogeny	Blein et al., 2014
589	-6.52307	30.4981		AAYN55a				Bou Azzer inlier	Quartz diorite	U–Pb LA-ICP-MS	Zircon	625	8		625±8	Neo-proterozoic	(650-570 Ma) Pan-African Orogeny	Pan-African Orogeny	Blein et al., 2014
590	-6.43205	30.4315		AGEE24				Bou Azzer inlier	sandstone	U-Pb SHRIMP	Zircon	606	14		606±14	Neo-proterozoic	(650-570 Ma) Pan-African Orogeny	Pan-African Orogeny	Blein et al., 2014
591	-6.43205	30.4315		AGEE24				Bou Azzer inlier	sandstone	U-Pb SHRIMP	Zircon	2045	13		2045±13	Paleo-proterozoic	Eburnean Orogeny	Eburnean Orogeny	Blein et al., 2014
592	-6.41659	30.3464		AGDG1				Sirwa inlier	quartz diorite	U–Pb LA-ICP-MS	Zircon	586	15		586±15	Neo-proterozoic	(650-570 Ma) Pan-African Orogeny	Pan-African Orogeny	Blein et al., 2014
593	-6.9014	30.5415		BOPC343	Adoudou Formation			Sirwa inlier	volcanic breccia	U-Pb SHRIMP	Whole Rock	541	6		541±6	Cambrian	(560-520 Ma) Pan-African Orogeny	Post Pan-African Orogeny	Blein et al., 2014
594	-6.72767	30.4931		1			Anti-Atlas	Tazigzaout inlier	Augen granite gneiss	U-Pb	Zircon	753	1	2	753±1-2	Neo-proterozoic	(750-665 Ma) Pan-African Orogeny	Pan-African Oceanization	D’Lemos et al., 2006
595	-6.73663	30.4837		2			Anti-Atlas	Tazigzaout inlier	Medium grained granite	U-Pb	Zircon	705	2	3	705±2-3	Neo-proterozoic	(750-665 Ma) Pan-African Orogeny	Pan-African Orogeny	D’Lemos et al., 2006
596	-6.73185	30.4856		3			Anti-Atlas	Tazigzaout inlier	Gabbro	U-Pb	Zircon	752	1	2	752±1-2	Neo-proterozoic	(750-665 Ma) Pan-African Orogeny	Pan-African Oceanization	D’Lemos et al., 2006
597	-6.7316	30.4858		4			Anti-Atlas	Tazigzaout inlier	Gabbro	U-Pb	Zircon	752	1	2	752±1-2	Neo-proterozoic	(750-665 Ma) Pan-African Orogeny	Pan-African Oceanization	D’Lemos et al., 2006
598	-6.73038	30.4918		5			Anti-Atlas	Tazigzaout inlier	Metagranite	U-Pb	Zircon	750			750	Neo-proterozoic	(750-665 Ma) Pan-African Orogeny	Pan-African Orogeny	D’Lemos et al., 2006
599	-6.72963	30.4869		6			Anti-Atlas	Tazigzaout inlier	Fine-grained granite	U-Pb	Zircon	701	2	1	701±2-1	Neo-proterozoic	(750-665 Ma) Pan-African Orogeny	Pan-African Orogeny	D’Lemos et al., 2006
600	-6.72913	30.497		7			Anti-Atlas	Tazigzaout inlier	Granitic dike	U-Pb	Zircon	700			700	Neo-proterozoic	(750-665 Ma) Pan-African Orogeny	Pan-African Orogeny	D’Lemos et al., 2006
601	-6.72767	30.4931		1			Anti-Atlas	Tazigzaout inlier	Augen granite gneiss	Sm-Nd	Whole Rock	890			890	Neo-proterozoic	(1100-870 Ma) Pan-African Rifting-Oceanization	Pan-African Oceanization	D’Lemos et al., 2006
602	-6.73663	30.4837		2			Anti-Atlas	Tazigzaout inlier	Medium grained granite	Sm-Nd	Whole Rock	840			840	Neo-proterozoic	(870-840 Ma) Pan-African Rifting	Pan-African Oceanization	D’Lemos et al., 2006
603	-6.73185	30.4856		3			Anti-Atlas	Tazigzaout inlier	Gabbro	Sm-Nd	Whole Rock	780			780	Neo-proterozoic	(840-750) Pan-African Rifting	Pan-African Oceanization	D’Lemos et al., 2006
604	-6.7316	30.4858		4			Anti-Atlas	Tazigzaout inlier	Gabbro	Sm-Nd	Whole Rock	790			790	Neo-proterozoic	(840-750) Pan-African Rifting	Pan-African Oceanization	D’Lemos et al., 2006
605	-6.73038	30.4918		5			Anti-Atlas	Tazigzaout inlier	Metagranite	Sm-Nd	Whole Rock	820			820	Neo-proterozoic	(840-750) Pan-African Rifting	Pan-African Oceanization	D’Lemos et al., 2006
606	-6.72963	30.4869		6			Anti-Atlas	Tazigzaout inlier	Fine-grained granite	Sm-Nd	Whole Rock	795			795	Neo-proterozoic	(840-750) Pan-African Rifting	Pan-African Oceanization	D’Lemos et al., 2006
607	-6.72913	30.497		7			Anti-Atlas	Tazigzaout inlier	Granitic dike	Sm-Nd	Whole Rock	790			790	Neo-proterozoic	(840-750) Pan-African Rifting	Pan-African Oceanization	D’Lemos et al., 2006
608	-7.18156	30.5364		TZG2	Azguemerzi		Anti-Atlas	Zenaga inlier	granodiorite	Sr-Nd TDM	Whole Rock	2284			2284	Paleo-proterozoic	Eburnean Orogeny	Eburnean Orogeny	Ennih and Liégeois, 2008
609	-7.173	30.5486		ASZ16	Azguemerzi		Anti-Atlas	Zenaga inlier	granodiorite	Sr-Nd TDM	Whole Rock	2151			2151	Paleo-proterozoic	Eburnean Orogeny	Eburnean Orogeny	Ennih and Liégeois, 2008
610	-7.19798	30.5207		Tim40	Azguemerzi		Anti-Atlas	Zenaga inlier	granodiorite	Sr-Nd TDM	Whole Rock	2253			2253	Paleo-proterozoic	Eburnean Orogeny	Eburnean Orogeny	Ennih and Liégeois, 2008
611	-7.19727	30.4943		AD24	Aït Daoui		Anti-Atlas	Zenaga inlier	monzogranite	Sr-Nd TDM	Whole Rock	2120			2120	Paleo-proterozoic	Eburnean Orogeny	Eburnean Orogeny	Ennih and Liégeois, 2008
612	-7.22439	30.4401		AD26	Aït Daoui		Anti-Atlas	Zenaga inlier	monzogranite	Sr-Nd TDM	Whole Rock	2135			2135	Paleo-proterozoic	Eburnean Orogeny	Eburnean Orogeny	Ennih and Liégeois, 2008
613	-7.21511	30.4522		AD28	Aït Daoui		Anti-Atlas	Zenaga inlier	monzogranite	Sr-Nd TDM	Whole Rock	2170			2170	Paleo-proterozoic	Eburnean Orogeny	Eburnean Orogeny	Ennih and Liégeois, 2008
614	-7.27722	30.3715		An39	Tamarouft		Anti-Atlas	Zenaga inlier	monzogranite	Sr-Nd TDM	Whole Rock	N/D			N/D				Ennih and Liégeois, 2008
615	-7.30149	30.368		TGR43	Tamarouft		Anti-Atlas	Zenaga inlier	monzogranite	Sr-Nd TDM	Whole Rock	N/D			N/D				Ennih and Liégeois, 2008
616	-7.29006	30.348		TGR48	Tamarouft		Anti-Atlas	Zenaga inlier	monzogranite	Sr-Nd TDM	Whole Rock	N/D			N/D				Ennih and Liégeois, 2008
617	-7.14301	30.5578		TZK3	Tazenakht		Anti-Atlas	Zenaga inlier	monzogranite	Sr-Nd TDM	Whole Rock	2086			2086	Paleo-proterozoic	Eburnean Orogeny	Eburnean Orogeny	Ennih and Liégeois, 2008
618	-7.17014	30.5743		TA4	Tazenakht		Anti-Atlas	Zenaga inlier	monzogranite	Sr-Nd TDM	Whole Rock	1992			1992	Paleo-proterozoic	Eburnean Orogeny	Eburnean Orogeny	Ennih and Liégeois, 2008
619	-7.14801	30.5778		TA8	Tazenakht		Anti-Atlas	Zenaga inlier	monzogranite	Sr-Nd TDM	Whole Rock	2245			2245	Paleo-proterozoic	Eburnean Orogeny	Eburnean Orogeny	Ennih and Liégeois, 2008
620	-8.26988	30.372		M1149	upper Ouarzazate Group Minount Rhyodacite			Anti-Atlas	Rhyodacite	U-Pb	Zircon	562.89	0.49		562,89±0,49	Neo-proterozoic	(560-520 Ma) Pan-African Orogeny	Pan-African Orogeny	Maloof et al., 2005
621	-8.58873	30.3101		M223	upper Adoudou Formation ash bed			Anti-Atlas	Ash	U-Pb	Zircon	525.38	0.46		525,38±0,46	Cambrian	(560-520 Ma) Pan-African Orogeny	Post Pan-African Orogeny	Maloof et al., 2005
622	-7.9146	30.8351		DZB	Askaoun granodiorite	Tifnoute Valley		Anti-Atlas	Granodiorite	U–Pb LA-ICP-MS	Zircon	558	2		558±2	Neo-proterozoic	(560-520 Ma) Pan-African Orogeny	Pan-African Orogeny	Toummmite et al., 2013
623	-7.87028	30.916		PH10	Imourkhssen granite	Tifnoute Valley		Anti-Atlas	Granite	U–Pb LA-ICP-MS	Zircon	561	3		561±3	Neo-proterozoic	(560-520 Ma) Pan-African Orogeny	Pan-African Orogeny	Toummmite et al., 2013
624	-7.87028	30.916		PH10	Imourkhssen granite	Tifnoute Valley		Anti-Atlas	Granite	U–Pb LA-ICP-MS	Zircon	558	6		558±6	Neo-proterozoic	(560-520 Ma) Pan-African Orogeny	Pan-African Orogeny	Toummmite et al., 2013
625	-7.88843	30.9098		MS7	Askaoun granodiorite	Tifnoute Valley		Anti-Atlas	Granodiorite	U–Pb LA-ICP-MS	Zircon	558	3		558±3	Neo-proterozoic	(560-520 Ma) Pan-African Orogeny	Pan-African Orogeny	Toummmite et al., 2013
626	-7.86813	30.9487		TA1		Askaoun		Anti-Atlas	qz-diorite	Sm-Nd & Rb-Sr TDM	Whole Rock	969			969	Neo-proterozoic	(1100-870 Ma) Pan-African Rifting-Oceanization	Pan-African Oceanization	Toummmite et al., 2013
627	-7.86813	30.9487		TA2		Askaoun		Anti-Atlas	qz-diorite	Sm-Nd & Rb-Sr TDM	Whole Rock	1010			1010	Meso-protezozoic	(1100-870 Ma) Pan-African Rifting-Oceanization	Pan-African Oceanization	Toummmite et al., 2013
628	-7.82946	30.951		PTN		Askaoun		Anti-Atlas	Granodiorite	Sm-Nd & Rb-Sr TDM	Whole Rock	957			957	Neo-proterozoic	(1100-870 Ma) Pan-African Rifting-Oceanization	Pan-African Oceanization	Toummmite et al., 2013
629	-7.87623	30.9065		IM3		Askaoun		Anti-Atlas	Granodiorite	Sm-Nd & Rb-Sr TDM	Whole Rock	886			886	Neo-proterozoic	(1100-870 Ma) Pan-African Rifting-Oceanization	Pan-African Oceanization	Toummmite et al., 2013
630	-7.87623	30.9065		IM4		Askaoun		Anti-Atlas	Granodiorite	Sm-Nd & Rb-Sr TDM	Whole Rock	1004			1004	Meso-protezozoic	(1100-870 Ma) Pan-African Rifting-Oceanization	Pan-African Oceanization	Toummmite et al., 2013
631	-7.83957	31.0126		Ab1		Askaoun		Anti-Atlas	Granodiorite	Sm-Nd & Rb-Sr TDM	Whole Rock	959			959	Neo-proterozoic	(1100-870 Ma) Pan-African Rifting-Oceanization	Pan-African Oceanization	Toummmite et al., 2013
632	-7.83601	31.0105		Ab2		Askaoun		Anti-Atlas	Granodiorite	Sm-Nd & Rb-Sr TDM	Whole Rock	966			966	Neo-proterozoic	(1100-870 Ma) Pan-African Rifting-Oceanization	Pan-African Oceanization	Toummmite et al., 2013
633	-7.82649	31.0049		Az1		Askaoun		Anti-Atlas	Granodiorite	Sm-Nd & Rb-Sr TDM	Whole Rock	1009			1009	Meso-protezozoic	(1100-870 Ma) Pan-African Rifting-Oceanization	Pan-African Oceanization	Toummmite et al., 2013
634	-7.82292	31.0013		Az5		Askaoun		Anti-Atlas	Granodiorite	Sm-Nd & Rb-Sr TDM	Whole Rock	828			828	Neo-proterozoic	(840-750) Pan-African Rifting	Pan-African Oceanization	Toummmite et al., 2013
635	-7.89021	30.8687		As8		Askaoun		Anti-Atlas	Granodiorite	Sm-Nd & Rb-Sr TDM	Whole Rock	1022			1022	Meso-protezozoic	(1100-870 Ma) Pan-African Rifting-Oceanization	Pan-African Oceanization	Toummmite et al., 2013
636	-7.8711	30.9344		AM3		Imourkhssen		Anti-Atlas	granite	Sm-Nd & Rb-Sr TDM	Whole Rock	885			885	Neo-proterozoic	(1100-870 Ma) Pan-African Rifting-Oceanization	Pan-African Oceanization	Toummmite et al., 2013
637	-7.86545	30.9442		AM4		Imourkhssen		Anti-Atlas	granite	Sm-Nd & Rb-Sr TDM	Whole Rock	869			869	Neo-proterozoic	(870-840 Ma) Pan-African Rifting	Pan-African Oceanization	Toummmite et al., 2013
638	-7.80061	30.9861		LT1		Ougougane		Anti-Atlas	granite	Sm-Nd & Rb-Sr TDM	Whole Rock	1054			1054	Meso-protezozoic	(1100-870 Ma) Pan-African Rifting-Oceanization	Pan-African Oceanization	Toummmite et al., 2013
639	-7.86515	30.9507		TA4		Ougougane		Anti-Atlas	granite	Sm-Nd & Rb-Sr TDM	Whole Rock	901			901	Neo-proterozoic	(1100-870 Ma) Pan-African Rifting-Oceanization	Pan-African Oceanization	Toummmite et al., 2013
640	-7.87623	30.9065		IM2		Ougougane		Anti-Atlas	granite	Sm-Nd & Rb-Sr TDM	Whole Rock	1022			1022	Meso-protezozoic	(1100-870 Ma) Pan-African Rifting-Oceanization	Pan-African Oceanization	Toummmite et al., 2013
641	-7.86515	30.9507		TA 6a		Ougougane		Anti-Atlas	granite	Sm-Nd & Rb-Sr TDM	Whole Rock	1218			1218	Meso-protezozoic	(1600-1200) Pre-Pan-African	Ante-Pan-African	Toummmite et al., 2013
642	-7.86515	30.9507		TA 7		Ougougane		Anti-Atlas	granite	Sm-Nd & Rb-Sr TDM	Whole Rock	1071			1071	Meso-protezozoic	(1100-870 Ma) Pan-African Rifting-Oceanization	Pan-African Oceanization	Toummmite et al., 2013
643	-7.83957	31.0126		Ab 1 ZNcl		Ougougane		Anti-Atlas	granite	Sm-Nd & Rb-Sr TDM	Whole Rock	1008			1008	Meso-protezozoic	(1100-870 Ma) Pan-African Rifting-Oceanization	Pan-African Oceanization	Toummmite et al., 2013
644	-7.83957	31.0126		Ab6		Ougougane		Anti-Atlas	granite	Sm-Nd & Rb-Sr TDM	Whole Rock	1054			1054	Meso-protezozoic	(1100-870 Ma) Pan-African Rifting-Oceanization	Pan-African Oceanization	Toummmite et al., 2013
645	-7.86515	30.9507		TA-6b		Ougougane		Anti-Atlas	granite	Sm-Nd & Rb-Sr TDM	Whole Rock	937			937	Neo-proterozoic	(1100-870 Ma) Pan-African Rifting-Oceanization	Pan-African Oceanization	Toummmite et al., 2013
646	-7.83957	31.0126		AB3		Ougougane		Anti-Atlas	Mafic dykes	Sm-Nd & Rb-Sr TDM	Whole Rock	643			643	Neo-proterozoic	(650-570 Ma) Pan-African Orogeny	Pan-African Orogeny	Toummmite et al., 2013
647	-7.82292	31.0013		Az2		Ougougane		Anti-Atlas	Mafic dykes	Sm-Nd & Rb-Sr TDM	Whole Rock	748			748	Neo-proterozoic	(750-665 Ma) Pan-African Orogeny	Pan-African Orogeny	Toummmite et al., 2013
648	-6.79295	30.5085		OU-2	Oumlill granite		Anti-Atlas	Bou Azzer inlier	Granite	U-Pb SHRIMP	Zircon	741	7		741±7	Neo-proterozoic	(750-665 Ma) Pan-African Orogeny	Pan-African Orogeny	El Hadi et al., 2010
649	-6.65835	30.4321		BAZ4	Bou Azzer ophiolitic gabbro		Anti-Atlas	Bou Azzer inlier	ophiolitic gabbro	U-Pb SHRIMP	Zircon	697	6		697±6	Neo-proterozoic	(750-665 Ma) Pan-African Orogeny	Pan-African Orogeny	El Hadi et al., 2010
650	-6.66285	30.5155		BA-11			Anti-Atlas	Bou Azzer inlier	calcalkaline granitoids	U-Pb SHRIMP	Zircon	632	9		632±9	Neo-proterozoic	(650-570 Ma) Pan-African Orogeny	Pan-African Orogeny	El Hadi et al., 2010
651	-6.98731	30.5466		BA-12			Anti-Atlas	Bou Azzer inlier	calcalkaline granitoids	U-Pb SHRIMP	Zircon	659	5		659±5	Neo-proterozoic	(750-665 Ma) Pan-African Orogeny	Pan-African Orogeny	El Hadi et al., 2010
652	2.18583	22.6412		TINZ3	Tidéridjaouine eclogites	Tileouine-Tideridjaouine	West Hoggar	Saghro inlier	Eclogite	U-Pb	Zircon	623	2		623±2	Neo-proterozoic	(650-570 Ma) Pan-African Orogeny	Pan-African Orogeny	Berger et al., 2014
653	2.18583	22.6412		TINZ3	Tidéridjaouine eclogites	Tileouine-Tideridjaouine	West Hoggar	Saghro inlier	Eclogite	Sr-Nd TDM	Whole Rock	1291			1291	Meso-protezozoic	(1600-1200) Pre-Pan-African	Ante-Pan-African	Berger et al., 2014
654	2.50097	23.525		TIL4	Tidéridjaouine eclogites	Tileouine-Tideridjaouine	West Hoggar	Saghro inlier	Eclogite	Sr-Nd TDM	Whole Rock	1014			1014	Meso-protezozoic	(1100-870 Ma) Pan-African Rifting-Oceanization	Pan-African Oceanization	Berger et al., 2014
655	2.50097	23.525		TIl6	Tidéridjaouine eclogites	Tileouine-Tideridjaouine	West Hoggar	Saghro inlier	Eclogite	Sr-Nd TDM	Whole Rock	921			921	Neo-proterozoic	(1100-870 Ma) Pan-African Rifting-Oceanization	Pan-African Oceanization	Berger et al., 2014
656	2.50097	23.525		TIL9	Tidéridjaouine eclogites	Tileouine-Tideridjaouine	West Hoggar	Saghro inlier	Eclogite	Sr-Nd TDM	Whole Rock	1978			1978	Paleo-proterozoic	Eburnean Orogeny	Eburnean Orogeny	Berger et al., 2014
657	2.18363	22.6393		TINZ1	Tidéridjaouine eclogites	Tileouine-Tideridjaouine	West Hoggar	Saghro inlier	Eclogite	Sr-Nd TDM	Whole Rock	1291			1291	Meso-protezozoic	(1600-1200) Pre-Pan-African	Ante-Pan-African	Berger et al., 2014
658	2.18217	22.6402		TINZ4	Tidéridjaouine eclogites	Tileouine-Tideridjaouine	West Hoggar	Tagragra de Tata inlier	Eclogite	Sr-Nd TDM	Whole Rock	1929			1929	Paleo-proterozoic	Eburnean Orogeny	Eburnean Orogeny	Berger et al., 2014
659	2.18251	22.6405		TINZ5	Tidéridjaouine eclogites	Tileouine-Tideridjaouine	West Hoggar	Tagragra de Tata inlier	Eclogite	Sr-Nd TDM	Whole Rock	1277			1277	Meso-protezozoic	(1600-1200) Pre-Pan-African	Ante-Pan-African	Berger et al., 2014
660	2.58196	23.4774			Green Series	In Zize synclinorium-Tanezrouft syncline	West Hoggar	Tagragra de Tata inlier	volcanic graywackes and associated volcanic-plutonic rocks	U-Pb	Zircon	640			640	Neo-proterozoic	(650-570 Ma) Pan-African Orogeny	Pan-African Orogeny	Allègre and Caby, 1972; Allègre, pers. Communication
661	2.58196	23.4774			Green Series	In Zize synclinorium-Tanezrouft syncline	West Hoggar	Tagragra de Tata inlier	volcanic graywackes and associated volcanic-plutonic rocks	Rb-Sr Isochron	Whole Rock	580			580	Neo-proterozoic	(650-570 Ma) Pan-African Orogeny	Pan-African Orogeny	Allègre and Caby, 1972; Allègre, pers. Communication
662	5.23583	23.5		Five samples		wadi Aou Zebéouène	LATEA metacraton	Tagragra de Tata inlier	granitic gneisses	Rb-Sr Isochron	Whole Rock	670	20		670±20	Neo-proterozoic	(750-665 Ma) Pan-African Orogeny	Pan-African Orogeny	Vialette and Vitel, 1979
663	5.05	23.0667			Arechchoum gneisses-In Eker pluton to the Torsournine massif	In Amguel	LATEA metacraton	Tefedest	Four whole-rock samples and one replicate of leucocratic parts of plagioclase-biotite and-or hornblende gneisses, veined and-or banded gneisses	Rb-Sr Isochron	Whole Rock	1330	70		1330±70	Meso-protezozoic	(1600-1200) Pre-Pan-African	Ante-Pan-African	Vialette and Vitel, 1979
664	5.08056	23.4403			Arechchoum gneisses-In Eker pluton to the Torsournine massif	Ighesn Ouerane	LATEA metacraton	Tefedest	Five samples from the dark part of these gneisses-paléosomes mélanocrates dans des gneiss	Rb-Sr Isochron	Whole Rock	1972	200		1972±200	Paleo-proterozoic	Eburnean Orogeny	Eburnean Orogeny	Vialette and Vitel, 1979
665	5.19583	22.9389		3405		Fort-Laperrine (Torsourine)	LATEA metacraton	Tefedest	Granite à biotite et muscovite	Sr-Rb	Biotite	445	30		445±30	Ordovician	Ordovician "Taconic"	Post Pan-African Orogeny	Picciotto et al., 1965
666	5.19583	22.9389		3405		Fort-Laperrine (Torsourine)	LATEA metacraton	Tefedest	Granite à biotite et muscovite	Sr-Rb	Muscovite	540	40		540±40	Cambrian	(560-520 Ma) Pan-African Orogeny	Post Pan-African Orogeny	Picciotto et al., 1965
667	5.19583	22.9389		3405		Fort-Laperrine (Torsourine)	LATEA metacraton	Tefedest	Granite à biotite et muscovite	Pb207-Pb206	Zircon	665	30		665±30	Neo-proterozoic	(750-665 Ma) Pan-African Orogeny	Pan-African Orogeny	Picciotto et al., 1965
668	5.17917	22.9014		3406		Fort-Laperrine (Torsourine)	LATEA metacraton	Tefedest	Granite à biotite et muscovite	Sr-Rb	Biotite	545	15		545±15	Neo-proterozoic	(560-520 Ma) Pan-African Orogeny	Pan-African Orogeny	Picciotto et al., 1965
669	5.17917	22.9014		3406		Fort-Laperrine (Torsourine)	LATEA metacraton	Tefedest	Granite à biotite et muscovite	Pb207-Pb206	Zircon	655	30		655±30	Neo-proterozoic	(750-665 Ma) Pan-African Orogeny	Pan-African Orogeny	Picciotto et al., 1965
670	5.17917	22.9014		3406		Fort-Laperrine (Torsourine)	LATEA metacraton	Tefedest	Granite à biotite et muscovite	Pb206-U238	Zircon	530	15		530±15	Cambrian	(560-520 Ma) Pan-African Orogeny	Post Pan-African Orogeny	Picciotto et al., 1965
671	5.17917	22.9014		3406		Fort-Laperrine (Torsourine)	LATEA metacraton	Tefedest	Granite à biotite et muscovite	Pb207-U235	Zircon	555	15		555±15	Neo-proterozoic	(560-520 Ma) Pan-African Orogeny	Pan-African Orogeny	Picciotto et al., 1965
672	5.80833	22.3458		3407		Fort-Laperrine (Anfeg)	LATEA metacraton	Laouni	Grannite à biotite	Sr-Rb	Biotite	700	35		700±35	Neo-proterozoic	(750-665 Ma) Pan-African Orogeny	Pan-African Orogeny	Picciotto et al., 1965
673	5.80833	22.3458		3407		Fort-Laperrine (Anfeg)	LATEA metacraton	Laouni	Grannite à biotite	Pb207-Pb206	Zircon	635	30		635±30	Neo-proterozoic	(650-570 Ma) Pan-African Orogeny	Pan-African Orogeny	Picciotto et al., 1965
674	5.80833	22.3458		3407		Fort-Laperrine (Anfeg)	LATEA metacraton	Laouni	Grannite à biotite	Pb206-U238	Zircon	595	15		595±15	Neo-proterozoic	(650-570 Ma) Pan-African Orogeny	Pan-African Orogeny	Picciotto et al., 1965
675	5.80833	22.3458		3407		Fort-Laperrine (Anfeg)	LATEA metacraton	Laouni	Grannite à biotite	Pb207-U235	Zircon	600	15		600±15	Neo-proterozoic	(650-570 Ma) Pan-African Orogeny	Pan-African Orogeny	Picciotto et al., 1965
676	5.69621	22.3387		3410		Fort-Laperrine (Anfeg)	LATEA metacraton	Laouni	Granodiorite	Sr-Rb	Biotite	635	30		635±30	Neo-proterozoic	(650-570 Ma) Pan-African Orogeny	Pan-African Orogeny	Picciotto et al., 1965
677	5.69621	22.3387		3410		Fort-Laperrine (Anfeg)	LATEA metacraton	Laouni	Granodiorite	Pb207-Pb206	Zircon	630	30		630±30	Neo-proterozoic	(650-570 Ma) Pan-African Orogeny	Pan-African Orogeny	Picciotto et al., 1965
678	5.69621	22.3387		3410		Fort-Laperrine (Anfeg)	LATEA metacraton	Laouni	Granodiorite	Pb206-U238	Zircon	505	5		505±5	Cambrian	(520-480 Ma) Pan-African Orogeny	Post Pan-African Orogeny	Picciotto et al., 1965
679	5.69621	22.3387		3410		Fort-Laperrine (Anfeg)	LATEA metacraton	Laouni	Granodiorite	Pb207-U235	Zircon	525	15		525±15	Cambrian	(560-520 Ma) Pan-African Orogeny	Post Pan-African Orogeny	Picciotto et al., 1965
680	5.025	24.7167		127		In ecker	LATEA metacraton	Tefedest	Schiste à muscovite	Sr-Rb	Muscovite	570	30		570±30	Neo-proterozoic	(650-570 Ma) Pan-African Orogeny	Pan-African Orogeny	Picciotto et al., 1965
681	5.825	21.9778		167		Tin Begane	LATEA metacraton	Laouni	Micaschiste à biotite	Sr-Rb	Biotite	555	25		555±25	Neo-proterozoic	(560-520 Ma) Pan-African Orogeny	Pan-African Orogeny	Picciotto et al., 1965
682	5.804	22.8599				Aheleheg (sommet)	LATEA metacraton	Laouni	Grannite à biotite	Sr-Rb	Zinnwaldite	495	15		495±15	Cambrian	(520-480 Ma) Pan-African Orogeny	Post Pan-African Orogeny	Picciotto et al., 1965
683	3.95647	24.5674		2048		Tinnirt	West Hoggar	Tin Zaoutene	Granite à microcline	Sr-Rb	Biotite	520	25		520±25	Cambrian	(560-520 Ma) Pan-African Orogeny	Post Pan-African Orogeny	Picciotto et al., 1965
684	3.95647	24.5674		2048		Tinnirt	West Hoggar	Tin Zaoutene	Granite à microcline	Pb207-Pb206	Zircon	610	30		610±30	Neo-proterozoic	(650-570 Ma) Pan-African Orogeny	Pan-African Orogeny	Picciotto et al., 1965
685	3.95647	24.5674		2048		Tinnirt	West Hoggar	Tin Zaoutene	Granite à microcline	Pb206-U238	Zircon	410	15		410±15	Devonian	Devonian "Caledonian"	Caledonian Orogeny	Picciotto et al., 1965
686	3.95647	24.5674		2048		Tinnirt	West Hoggar	Tin Zaoutene	Granite à microcline	Pb207-U235	Zircon	440	15		440±15	Silurian	Silurian "Caledonian"	Caledonian Orogeny	Picciotto et al., 1965
687	3.82634	24.7015		1808		Tin Touafa	West Hoggar	Tin Zaoutene	Granite à deux micas	Sr-Rb	Biotite	525	15		525±15	Cambrian	(560-520 Ma) Pan-African Orogeny	Post Pan-African Orogeny	Picciotto et al., 1965
688	3.82634	24.7015		1808		Tin Touafa	West Hoggar	Tin Zaoutene	Granite à deux micas	Sr-Rb	Whole Rock	510	100		510±100	Cambrian	(520-480 Ma) Pan-African Orogeny	Post Pan-African Orogeny	Picciotto et al., 1965
689	3.82634	24.7015		1808		Tin Touafa	West Hoggar	Tin Zaoutene	Granite à deux micas	Pb207-Pb206	Zircon	590	40		590±40	Neo-proterozoic	(650-570 Ma) Pan-African Orogeny	Pan-African Orogeny	Picciotto et al., 1965
690	3.82634	24.7015		1808		Tin Touafa	West Hoggar	Tin Zaoutene	Granite à deux micas	Pb206-U238	Zircon	355	15		355±15	Carboniferous	Carboniferous "Hercynian"	Hercyniann Orogeny	Picciotto et al., 1965
691	3.82634	24.7015		1808		Tin Touafa	West Hoggar	Tin Zaoutene	Granite à deux micas	Pb207-U235	Zircon	390	20		390±20	Devonian	Devonian "Caledonian"	Caledonian Orogeny	Picciotto et al., 1965
692	4.29167	24.1809		2023		Elbéma (Taourirt)	West Hoggar	In Teidini	Granite à biotite et muscovite	Sr-Rb	Biotite	480	15		480±15	Ordovician	(520-480 Ma) Pan-African Orogeny	Post Pan-African Orogeny	Picciotto et al., 1965
693	4.37843	23.7314		5667		Issédienne (Taourirt)	West Hoggar	In Teidini	Grannite à biotite	Sr-Rb	Biotite	470	15		470±15	Ordovician	Ordovician "Taconic"	Post Pan-African Orogeny	Picciotto et al., 1965
694	3.83028	23.7314		1		In Rabir	West Hoggar	Tin Zaoutene	Grannite à biotite	Sr-Rb	Biotite	510	15		510±15	Cambrian	(520-480 Ma) Pan-African Orogeny	Post Pan-African Orogeny	Picciotto et al., 1965
695	3.8207	23.6841		2		In Rabir	West Hoggar	Tin Zaoutene	Grannite à biotite	Sr-Rb	Biotite	620	30		620±30	Neo-proterozoic	(650-570 Ma) Pan-African Orogeny	Pan-African Orogeny	Picciotto et al., 1965
696	3.11165	21.7911		1203		Tim Missaou	West Hoggar	Tin Zaoutene	Quartzite à muscovite	Sr-Rb	Whole Rock	505	60		505±60	Cambrian	(520-480 Ma) Pan-African Orogeny	Post Pan-African Orogeny	Picciotto et al., 1965
697	2.625	23.5083		1035		In Zize	West Hoggar	IOGU	Rhyolite	Sr-Rb	Whole Rock	550	30		550±30	Neo-proterozoic	(560-520 Ma) Pan-African Orogeny	Pan-African Orogeny	Picciotto et al., 1965
698	7.41667	23.8333		443		Nazoubir	LATEA metacraton	Serouenout	Granite à biotite et amphibole	Sr-Rb	Biotite	525	25		525±25	Cambrian	(560-520 Ma) Pan-African Orogeny	Post Pan-African Orogeny	Picciotto et al., 1965
699	7.46667	23.8639		444		Nazoubir	LATEA metacraton	Serouenout	Granite à biotite et amphibole	Sr-Rb	Biotite	515	25		515±25	Cambrian	(520-480 Ma) Pan-African Orogeny	Post Pan-African Orogeny	Picciotto et al., 1965
700	7.47083	23.8833		522		Nazoubir	LATEA metacraton	Serouenout	Granite à biotite et amphibole	Sr-Rb	Biotite	530	35		530±35	Cambrian	(560-520 Ma) Pan-African Orogeny	Post Pan-African Orogeny	Picciotto et al., 1965
701	7.47083	23.8833		522		Nazoubir	LATEA metacraton	Serouenout	Granite à biotite et amphibole	Pb207-Pb206	Zircon	625	30		625±30	Neo-proterozoic	(650-570 Ma) Pan-African Orogeny	Pan-African Orogeny	Picciotto et al., 1965
702	7.47083	23.8833		522		Nazoubir	LATEA metacraton	Serouenout	Granite à biotite et amphibole	Pb206-U238	Zircon	545	15		545±15	Neo-proterozoic	(560-520 Ma) Pan-African Orogeny	Pan-African Orogeny	Picciotto et al., 1965
703	7.47083	23.8833		522		Nazoubir	LATEA metacraton	Serouenout	Granite à biotite et amphibole	Pb207-U235	Zircon	565	15		565±15	Neo-proterozoic	(650-570 Ma) Pan-African Orogeny	Pan-African Orogeny	Picciotto et al., 1965
704	7.425	23.8472		523		Nazoubir	LATEA metacraton	Serouenout	Granite	Pb207-Pb206 on zircon	Zircon	650	30		650±30	Neo-proterozoic	(650-570 Ma) Pan-African Orogeny	Pan-African Orogeny	Picciotto et al., 1965
705	7.425	23.8472		523		Nazoubir	LATEA metacraton	Serouenout	Granite	Pb206-U238	Zircon	515	15		515±15	Cambrian	(520-480 Ma) Pan-African Orogeny	Post Pan-African Orogeny	Picciotto et al., 1965
706	7.425	23.8472		523		Nazoubir	LATEA metacraton	Serouenout	Granite	Pb207-U235	Zircon	540	15		540±15	Cambrian	(560-520 Ma) Pan-African Orogeny	Post Pan-African Orogeny	Picciotto et al., 1965
707	7.39611	24.3939		661		Serouenout	LATEA metacraton	Serouenout	Micaschiste	Sr-Rb	Muscovite	960	95		960±95	Neo-proterozoic	(1100-870 Ma) Pan-African Rifting-Oceanization	Pan-African Oceanization	Picciotto et al., 1965
708	7.09583	20.4417						Tin Serririne	Pegmatite	Sr-Rb	Zinnwaldite	510	15		510±15	Cambrian	(520-480 Ma) Pan-African Orogeny	Post Pan-African Orogeny	Picciotto et al., 1965
709	7.09583	20.4417						Tin Serririne	Pegmatite	Sr-Rb	Zinnwaldite	470	15		470±15	Ordovician	Ordovician "Taconic"	Post Pan-African Orogeny	Picciotto et al., 1965
710	7.09583	20.4417						Tin Serririne	Pegmatite	Sr-Rb	Microcline	500	15		500±15	Cambrian	(520-480 Ma) Pan-African Orogeny	Post Pan-African Orogeny	Picciotto et al., 1965
711	6.5263	23.9972		G6-7	Gneiss de l'Arechchoum	O. Tioussalatine	LATEA metacraton	Egéré-Aleskod	Gneiss amphibolique	K-Ar	Amphibole	580	16		580±16	Neo-proterozoic	(650-570 Ma) Pan-African Orogeny	Pan-African Orogeny	Bertrand et al., 1972
712	6.50051	23.7261		F66	Gneiss de l'Arechchoum	O. Ihanlèlène	LATEA metacraton	Egéré-Aleskod	Gneiss amphibolique	K-Ar	Amphibole	658	18		658±18	Neo-proterozoic	(750-665 Ma) Pan-African Orogeny	Pan-African Orogeny	Bertrand et al., 1972
713	6.4046	24.0304		E43	Filons basiques	O. Ouadenki	LATEA metacraton	Egéré-Aleskod	Basic dyke	K-Ar	Amphibole	1435	39		1435±39	Meso-protezozoic	(1600-1200) Pre-Pan-African	Ante-Pan-African	Bertrand et al., 1972
714	6.39652	24.0348		G13-5	Filons basiques	O. Ouadenki	LATEA metacraton	Egéré-Aleskod	Basic dyke	K-Ar	Amphibole	1460	40		1460±40	Meso-protezozoic	(1600-1200) Pre-Pan-African	Ante-Pan-African	Bertrand et al., 1972
715	6.39652	24.0348		G4-5	Filons basiques	O. Ouadenki	LATEA metacraton	Egéré-Aleskod	Basic dyke	K-Ar	Amphibole	617	17		617±17	Neo-proterozoic	(650-570 Ma) Pan-African Orogeny	Pan-African Orogeny	Bertrand et al., 1972
716	6.35388	24.1706		F27	Filons basiques	O.In Kaokane	LATEA metacraton	Egéré-Aleskod	Amphibolite	K-Ar	Amphibole	647	18		647±18	Neo-proterozoic	(650-570 Ma) Pan-African Orogeny	Pan-African Orogeny	Bertrand et al., 1972
717	6.40888	24.0226		G3-8	Série de l'Egéré	O. Setteffet	LATEA metacraton	Egéré-Aleskod	Amphibolites & pyroxenite	K-Ar	Amphibole	697	19		697±19	Neo-proterozoic	(750-665 Ma) Pan-African Orogeny	Pan-African Orogeny	Bertrand et al., 1972
718	6.40888	24.0226		G2-8	Série de l'Egéré	O. Setteffet	LATEA metacraton	Egéré-Aleskod	Amphibolites & pyroxenite	K-Ar	Amphibole	720	20		720±20	Neo-proterozoic	(750-665 Ma) Pan-African Orogeny	Pan-African Orogeny	Bertrand et al., 1972
719	6.40888	24.0226		E61	Série de l'Egéré	O. Setteffet	LATEA metacraton	Egéré-Aleskod	Amphibolites & pyroxenite	K-Ar	Amphibole	926	26		926±26	Neo-proterozoic	(1100-870 Ma) Pan-African Rifting-Oceanization	Pan-African Oceanization	Bertrand et al., 1972
720	6.40888	24.0226		E63	Série de l'Egéré	O. Setteffet	LATEA metacraton	Egéré-Aleskod	Amphibolites & pyroxenite	K-Ar	Amphibole	933	26		933±26	Neo-proterozoic	(1100-870 Ma) Pan-African Rifting-Oceanization	Pan-African Oceanization	Bertrand et al., 1972
721	6.40888	24.0226		G4-8	Série de l'Egéré	O. Setteffet	LATEA metacraton	Egéré-Aleskod	Amphibolites & pyroxenite	K-Ar	Amphibole	914	25		914±25	Neo-proterozoic	(1100-870 Ma) Pan-African Rifting-Oceanization	Pan-African Oceanization	Bertrand et al., 1972
722	6.245	23.877		E104-6	Série de l'Egéré	O. Telohat	LATEA metacraton	Egéré-Aleskod	Amphibolites & pyroxenite	K-Ar	Amphibole	974	27		974±27	Neo-proterozoic	(1100-870 Ma) Pan-African Rifting-Oceanization	Pan-African Oceanization	Bertrand et al., 1972
723	6.16063	24.0463		E117	Gneiss du Talat Mellet	O. Abès Abès	LATEA metacraton	Egéré-Aleskod	Gneiss amphibolique	K-Ar	Amphibole	649	18		649±18	Neo-proterozoic	(650-570 Ma) Pan-African Orogeny	Pan-African Orogeny	Bertrand et al., 1972
724	6.18499	24.0272		G8-20	Gneiss du Talat Mellet	O. Tihoun Aorani	LATEA metacraton	Egéré-Aleskod	Gneiss amphibolique	K-Ar	Amphibole	706	20		706±20	Neo-proterozoic	(750-665 Ma) Pan-African Orogeny	Pan-African Orogeny	Bertrand et al., 1972
725	6.15528	23.9933		G3-11	Gneiss du Talat Mellet	O. aux vaches	LATEA metacraton	Egéré-Aleskod	Gneiss amphibolique	K-Ar	Amphibole	616	17		616±17	Neo-proterozoic	(650-570 Ma) Pan-African Orogeny	Pan-African Orogeny	Bertrand et al., 1972
726	6.15528	23.9813		G1-10	Gneiss du Talat Mellet	O. Tarasit tan Tarent	LATEA metacraton	Egéré-Aleskod	Gneiss amphibolique	K-Ar	Amphibole	622	17		622±17	Neo-proterozoic	(650-570 Ma) Pan-African Orogeny	Pan-African Orogeny	Bertrand et al., 1972
727	6.53141	23.8273		F74-1	Granodiotrite Oued Aha'n'Souri	0. Aha'n'Souri	LATEA metacraton	Egéré-Aleskod	Granodiorite	K-Ar	Amphibole	595	17		595±17	Neo-proterozoic	(650-570 Ma) Pan-African Orogeny	Pan-African Orogeny	Bertrand et al., 1972
728	4.2	22.4667					West Hoggar	Iskel	Granite	Rb-Sr	Whole Rock	564	40		564±40	Neo-proterozoic	(560-520 Ma) Pan-African Orogeny	Pan-African Orogeny	Boissonas et al., 1969
729	4.23333	22.7833				Tioueine	West Hoggar	Iskel	Granite	Rb-Sr	Whole Rock	560	40		560±40	Neo-proterozoic	(560-520 Ma) Pan-African Orogeny	Pan-African Orogeny	Boissonas et al., 1969
730	2.75	23.5				In Zize	West Hoggar	IOGU	Granite	Rb-Sr	Whole Rock	550	30		550±30	Neo-proterozoic	(560-520 Ma) Pan-African Orogeny	Pan-African Orogeny	Picciotto et al., 1965
731	6.83333	23.5					LATEA metacraton	Egéré-Aleskod	Granite	Rb-Sr	Whole Rock	515	7		515±7	Cambrian	(520-480 Ma) Pan-African Orogeny	Post Pan-African Orogeny	Bertrand, 1974
732	6.26809	22.2062			Temaguessine pluton	Tahifet	LATEA metacraton	Azrou-n-fad	Granitic batholiths-alkali-calcic pluton	U-Pb SHRIMP	Zircon	582	5		582±5	Neo-proterozoic	(650-570 Ma) Pan-African Orogeny	Pan-African Orogeny	Abdallah et al., 2007
733	6.26809	22.2062			Temaguessine pluton	Tahifet	LATEA metacraton	Azrou-n-fad	Granitic batholiths-alkali-calcic pluton	U-Pb SHRIMP	Zircon	609	10		609±10	Neo-proterozoic	(650-570 Ma) Pan-African Orogeny	Pan-African Orogeny	Abdallah et al., 2007
734	6.26809	22.2062			Temaguessine pluton	Tahifet	LATEA metacraton	Azrou-n-fad	Granitic batholiths-alkali-calcic pluton	U-Pb SHRIMP	Zircon	1760	56		1760±56	Paleo-proterozoic	Eburnean Orogeny	Eburnean Orogeny	Abdallah et al., 2007
735	6.26809	22.2062			Temaguessine pluton	Tahifet	LATEA metacraton	Azrou-n-fad	Granitic batholiths-alkali-calcic pluton	U-Pb SHRIMP	Zircon	1874	12		1874±12	Paleo-proterozoic	Eburnean Orogeny	Eburnean Orogeny	Abdallah et al., 2007
736	6.26809	22.2062			Temaguessine pluton	Tahifet	LATEA metacraton	Azrou-n-fad	Granitic batholiths-alkali-calcic pluton	U-Pb SHRIMP	Zircon	2039	40		2039±40	Paleo-proterozoic	Eburnean Orogeny	Eburnean Orogeny	Abdallah et al., 2007
737	6.26809	22.2062			Temaguessine pluton	Tahifet	LATEA metacraton	Azrou-n-fad	Granitic batholiths-alkali-calcic pluton	Sr-Nd TDM	Whole Rock	1642			1642	Paleo-proterozoic	Eburnean Orogeny	Eburnean Orogeny	Abdallah et al., 2007
738	6.26809	22.2062			Temaguessine pluton	Tahifet	LATEA metacraton	Azrou-n-fad	Granitic batholiths-alkali-calcic pluton	Sr-Nd TDM	Whole Rock	1921			1921	Paleo-proterozoic	Eburnean Orogeny	Eburnean Orogeny	Abdallah et al., 2007
739	5.80512	22.5723			Anfeg batholith	Anfeg	LATEA metacraton	Laouni	Granodiorite & granite	U-Pb	Zircon	608			608	Neo-proterozoic	(650-570 Ma) Pan-African Orogeny	Pan-African Orogeny	Acef et al., 2003
740	5.80512	22.5723			Anfeg batholith	Anfeg	LATEA metacraton	Laouni	Granodiorite & granite	Sr-Nd TDM	Whole Rock	2335			2335	Paleo-proterozoic	Eburnean Orogeny	Eburnean Orogeny	Acef et al., 2003
741	5.80512	22.5723			Anfeg batholith	Anfeg	LATEA metacraton	Laouni	Granodiorite & granite	Sr-Nd TDM	Whole Rock	995			995	Neo-proterozoic	(1100-870 Ma) Pan-African Rifting-Oceanization	Pan-African Oceanization	Acef et al., 2003
742	5.80512	22.5723			Anfeg batholith	Anfeg	LATEA metacraton	Laouni	high-K calc-alkaline batholiths	U-Pb	Zircon	615	5		615±5	Neo-proterozoic	(650-570 Ma) Pan-African Orogeny	Pan-African Orogeny	Liégeois et al., 2003
743	2.18363	22.6393			Tin Zebane mafic rocks	Tin Zebane	West Hoggar	Tassendjanet	mafic rocks granitoids	Rb-Sr Isochron	Whole Rock	592.2	5.8		592,2 ± 5,8	Neo-proterozoic	(650-570 Ma) Pan-African Orogeny	Pan-African Orogeny	Hadj-Kaddour et al., 1998
744	2.19508	22.6353		TZ115		Tin Zebane	West Hoggar	Tassendjanet	gabbro–anorthosit	Sr-Nd TDM	Whole Rock	720			720	Neo-proterozoic	(750-665 Ma) Pan-African Orogeny	Pan-African Orogeny	Aït-Djafer et al., 2003
745	2.19033	22.6279		TZ123		Tin Zebane	West Hoggar	Tassendjanet	gabbro–anorthosit	Sr-Nd TDM	Whole Rock	503			503	Cambrian	(520-480 Ma) Pan-African Orogeny	Post Pan-African Orogeny	Aït-Djafer et al., 2003
746	2.17382	22.5367		TZ145		Tin Zebane	West Hoggar	Tassendjanet	gabbro–anorthosit	Sr-Nd TDM	Whole Rock	641			641	Neo-proterozoic	(650-570 Ma) Pan-African Orogeny	Pan-African Orogeny	Aït-Djafer et al., 2003
747	3.08524	23.5628				Ihouhaouene	West Hoggar	IOGU	Carbonatite	U-Pb	Zircon	1994	22	17	1994± 22 -17	Paleo-proterozoic	Eburnean Orogeny	Eburnean Orogeny	Bernard-Griffiths et al., 1988
748	3.08524	23.5628				Ihouhaouene	West Hoggar	IOGU	Carbonatite	Sr-Nd TDM	Whole Rock	3280			3280	Archean	Ouzzalian Orogeny	Archean	Bernard-Griffiths et al., 1988
749	3.08524	23.5628				Ihouhaouene	West Hoggar	IOGU	Carbonatite	Sr-Nd TDM	Whole Rock	2750			2750	Archean	Ouzzalian Orogeny	Archean	Bernard-Griffiths et al., 1988
750	4.59193	24.6172			Tesnou pluton	Silet-Taourirt	West Hoggar	Iskel	high-K calc-alkaline batholiths	Rb-Sr Isochron	Whole Rock	506	16		506±16	Cambrian	(520-480 Ma) Pan-African Orogeny	Post Pan-African Orogeny	Azzouni-Sekkal et al., 2003
751	4.59193	24.6172			Tesnou pluton	Silet-Taourirt	West Hoggar	Iskel	high-K calc-alkaline batholiths	Sr-Nd TDM	Whole Rock	1290			1290	Meso-protezozoic	(1600-1200) Pre-Pan-African	Ante-Pan-African	Azzouni-Sekkal et al., 2003
752	4.59193	24.6172			Tesnou pluton	Silet-Taourirt	West Hoggar	Iskel	high-K calc-alkaline batholiths	Sr-Nd TDM	Whole Rock	1413			1413	Meso-protezozoic	(1600-1200) Pre-Pan-African	Ante-Pan-African	Azzouni-Sekkal et al., 2003
753	4.79451	23.1562			Teg’Orak pluton	Teg’Orak		Iskel	high-K calc-alkaline batholiths	Rb-Sr Isochron	Whole Rock	519	1 8		519± 1 8	Cambrian	(520-480 Ma) Pan-African Orogeny	Post Pan-African Orogeny	Azzouni-Sekkal et al., 2003
754	4.79451	23.1562			Teg’Orak pluton	Teg’Orak		Iskel	high-K calc-alkaline batholiths	Sr-Nd TDM	Whole Rock	1993			1993	Paleo-proterozoic	Eburnean Orogeny	Eburnean Orogeny	Azzouni-Sekkal et al., 2003
755	4.79451	23.1562			Teg’Orak pluton	Teg’Orak		Iskel	high-K calc-alkaline batholiths	Sr-Nd TDM	Whole Rock	1455			1455	Meso-protezozoic	(1600-1200) Pre-Pan-African	Ante-Pan-African	Azzouni-Sekkal et al., 2003
756	4.86567	21.4255			Baouinet pluton	Baouinet North	LATEA metacraton	Laouni	high-K calc-alkaline batholiths	Rb-Sr Isochron	Whole Rock	524	43		524±43	Cambrian	(560-520 Ma) Pan-African Orogeny	Post Pan-African Orogeny	Azzouni-Sekkal et al., 2003
757	5.7027	22.7924			In Tounine pluton	Tamanrasset-Taourirt	LATEA metacraton	Laouni	high-K calc-alkaline batholiths	Rb-Sr Isochron	Whole Rock	502	42		502±42	Cambrian	(520-480 Ma) Pan-African Orogeny	Post Pan-African Orogeny	Azzouni-Sekkal et al., 2003
758	5.7027	22.7924			In Tounine pluton	Tamanrasset-Taourirt	LATEA metacraton	Laouni	high-K calc-alkaline batholiths	K-Ar	Mica	539			539	Cambrian	(560-520 Ma) Pan-African Orogeny	Post Pan-African Orogeny	Cheilletz et al., 1992
759	5.7027	22.7924			In Tounine pluton	Tamanrasset-Taourirt	LATEA metacraton	Laouni	high-K calc-alkaline batholiths	K-Ar	Mica	525			525	Cambrian	(560-520 Ma) Pan-African Orogeny	Post Pan-African Orogeny	Cheilletz et al., 1992
760	4.43674	24.293			Ait Oklan pluton	Silet-Taourirt	West Hoggar	Iskel	high-K calc-alkaline batholiths	Rb-Sr Isochron	Whole Rock	511	39		511±39	Cambrian	(520-480 Ma) Pan-African Orogeny	Post Pan-African Orogeny	Azzouni-Sekkal et al., 2003
761	4.43674	24.293			Ait Oklan pluton	Silet-Taourirt	West Hoggar	Iskel	high-K calc-alkaline batholiths	Sr-Nd TDM	Whole Rock	1786			1786	Paleo-proterozoic	Eburnean Orogeny	Eburnean Orogeny	Azzouni-Sekkal et al., 2003
762	4.43674	24.293			Ait Oklan pluton	Silet-Taourirt	West Hoggar	Iskel	high-K calc-alkaline batholiths	Sr-Nd TDM	Whole Rock	1233			1233	Meso-protezozoic	(1600-1200) Pre-Pan-African	Ante-Pan-African	Azzouni-Sekkal et al., 2003
763	5.25854	22.369			Tidjenouine granulites	Tidjenouine	LATEA metacraton	Laouni	Granulites	U-Pb	Zircon	2069	49		2069±49	Paleo-proterozoic	Eburnean Orogeny	Eburnean Orogeny	Bertrand et al., 1986
764	5.21941	22.2769		T11, T16	Iherane pluton	Iherane	LATEA metacraton	Laouni	Granulites, granite	Pb-U	Zircon	2075	30		2075±30	Paleo-proterozoic	Eburnean Orogeny	Eburnean Orogeny	Bertrand et al., 1986
765	5.21941	22.2769		T11, T16	Iherane pluton	Iherane	LATEA metacraton	Laouni	Granulites, granite	Pb-U	Zircon	530	70		530±70	Cambrian	(560-520 Ma) Pan-African Orogeny	Post Pan-African Orogeny	Bertrand et al., 1986
766	5.37056	22.3834		T18, T9		Tim Amzi	LATEA metacraton	Laouni	Granite complex	Pb-U	Zircon	612	50	20	612± 50-20	Neo-proterozoic	(650-570 Ma) Pan-African Orogeny	Pan-African Orogeny	Bertrand et al., 1986
767	5.44723	22.4497		1909, P59		Anfeg	LATEA metacraton	Laouni	Granite	Pb-U	Zircon	615	5		615±5	Neo-proterozoic	(650-570 Ma) Pan-African Orogeny	Pan-African Orogeny	Bertrand et al., 1986
768	5.25854	22.369		TJ5	Tidjenouine granulites	Tidjenouine	LATEA metacraton	Laouni	granulites facies migmatitic metapelites	U–Pb LA-ICP-MS	Zircon	2151	8		2151±8	Paleo-proterozoic	Eburnean Orogeny	Eburnean Orogeny	Benaoud et al., 2008
769	5.25854	22.369		TJ5	Tidjenouine granulites	Tidjenouine	LATEA metacraton	Laouni	granulites facies migmatitic metapelites	U–Pb LA-ICP-MS	Zircon	614	11		614±11	Neo-proterozoic	(650-570 Ma) Pan-African Orogeny	Pan-African Orogeny	Benaoud et al., 2008
770	5.25854	22.369		TJ5	Tidjenouine granulites	Tidjenouine	LATEA metacraton	Laouni	granulites facies migmatitic metapelites	U–Pb LA-ICP-MS	Zircon	2062	39		2062±39	Paleo-proterozoic	Eburnean Orogeny	Eburnean Orogeny	Benaoud et al., 2008
771	0.962611	18.429			Yenchichi pluton	Yenchichi	Adrar des Iforas	Kidal	Calc-alkalic granite	U-Pb	Zircon	545			545	Neo-proterozoic	(560-520 Ma) Pan-African Orogeny	Pan-African Orogeny	Liegeois and Black, 1984
772	1.2399	18.2556			Tafeliant Group	between Djounhane and Takellout ring-complexes	Adrar des Iforas	Kidal		U-Pb	Zircon	615			615	Neo-proterozoic	(650-570 Ma) Pan-African Orogeny	Pan-African Orogeny	Ducrot et al., 1979
773	1.19234	18.298			Adma granodioritic pluton		Adrar des Iforas	Kidal	adamellites	U-Pb	Zircon	611	3		611±3	Neo-proterozoic	(650-570 Ma) Pan-African Orogeny	Pan-African Orogeny	Fabre, 1982
774	1.19234	18.298			massif Adma		Adrar des Iforas	Kidal	damellite	U-Pb	Zircon	620	5	8	620± 5-8	Neo-proterozoic	(650-570 Ma) Pan-African Orogeny	Pan-African Orogeny	U. Andréopoulos-Renaud, données non publiées
775	1.20376	18.2684			Adma granodioritic pluton		Adrar des Iforas	Kidal	Diorite	Rb-Sr	Whole Rock	615			615	Neo-proterozoic	(650-570 Ma) Pan-African Orogeny	Pan-African Orogeny	Fabre, 1982
776	1.20376	18.2684			Adma granodioritic pluton		Adrar des Iforas	Kidal	Granodiorite	Rb-Sr Isochron	Whole Rock	595			595	Neo-proterozoic	(650-570 Ma) Pan-African Orogeny	Pan-African Orogeny	Liegeois and Black, 1984
777	0.940558	18.516			Tessalit-Aguel’hoc-Anefis shear-zone	Tessalit-Aguel’hoc-Anefis	Adrar des Iforas	Kidal		U-Pb	Zircon	566			566	Neo-proterozoic	(650-570 Ma) Pan-African Orogeny	Pan-African Orogeny	Lancelot et al., 1983
778	0.940558	18.516			Tessalit-Aguel’hoc-Anefis shear-zone	Tessalit-Aguel’hoc-Anefis	Adrar des Iforas	Kidal		U-Pb	Zircon	535			535	Cambrian	(560-520 Ma) Pan-African Orogeny	Post Pan-African Orogeny	Lancelot et al., 1983
779	2.50316	21.2062		F237c	East In Ouzzal shear zone	south of the Amesmessa stream	West Hoggar	IOGU	Mylonite-granophyre	40Ar-39Ar	Amphibole	891.6	10.3		891,6±10,3	Neo-proterozoic	(1100-870 Ma) Pan-African Rifting-Oceanization	Pan-African Oceanization	Ferkous and Monié, 2002
780	2.50316	21.2062		F237c	East In Ouzzal shear zone	south of the Amesmessa stream	West Hoggar	IOGU	Mylonite-granophyre	40Ar-39Ar	Amphibole	626	3.3		626±3,3	Neo-proterozoic	(650-570 Ma) Pan-African Orogeny	Pan-African Orogeny	Ferkous and Monié, 2002
781	2.50878	21.251		F59	East In Ouzzal shear zone	Amesmessa	West Hoggar	IOGU	banded mylonite	40Ar-39Ar	Biotite	433.4	1.5		433,4±1,5	Silurian	Silurian "Caledonian"	Caledonian Orogeny	Ferkous and Monié, 2002
782	2.50878	21.251		F59	East In Ouzzal shear zone	Amesmessa	West Hoggar	IOGU	banded mylonite	40Ar-39Ar	Biotite	565.2	2.2		565,2±2,2	Neo-proterozoic	(650-570 Ma) Pan-African Orogeny	Pan-African Orogeny	Ferkous and Monié, 2002
783	2.50968	21.2535		F300	East In Ouzzal shear zone	Amesmessa	West Hoggar	IOGU	metasomatized-an hydrothermal alteration assemblage made of sericite-carbonate- albite-quartz-rutile-pyrite	40Ar-39Ar	Sericite	611	2.1		611±2,1	Neo-proterozoic	(650-570 Ma) Pan-African Orogeny	Pan-African Orogeny	Ferkous and Monié, 2002
784	2.51429	21.2488		F124	East In Ouzzal shear zone	Amesmessa	West Hoggar	IOGU	A hydrothermally altered country rock hosting an E–W undeformed gold-poor quartz vein	40Ar-39Ar	Sericite	576.2	2		576,2±2	Neo-proterozoic	(650-570 Ma) Pan-African Orogeny	Pan-African Orogeny	Ferkous and Monié, 2002
785	2.49297	21.2173		F73	East In Ouzzal shear zone	Amesmessa	West Hoggar	IOGU	Carbonatite	40Ar-39Ar	Phlogopite	1212.4	3		1212,4±3	Meso-protezozoic	(1600-1200) Pre-Pan-African	Ante-Pan-African	Ferkous and Monié, 2002
786	2.49297	21.2173		F73	East In Ouzzal shear zone	Amesmessa	West Hoggar	IOGU	Carbonatite	40Ar-39Ar	Phlogopite	1830.2	4.8		1830,2±4,8	Paleo-proterozoic	Eburnean Orogeny	Eburnean Orogeny	Ferkous and Monié, 2002
787	2.5153	21.2572		F260	East In Ouzzal shear zone	Amesmessa	West Hoggar	IOGU	foliated carbonatite	40Ar-39Ar	Chlorite	849	3.3		849±3,3	Neo-proterozoic	(870-840 Ma) Pan-African Rifting	Pan-African Oceanization	Ferkous and Monié, 2002
788	2.5153	21.2572		F260	East In Ouzzal shear zone	Amesmessa	West Hoggar	IOGU	foliated carbonatite	40Ar-39Ar	Chlorite	473.6	2.8		473,6±2,8	Ordovician	Ordovician "Taconic"	Post Pan-African Orogeny	Ferkous and Monié, 2002
789	2.59976	21.3897		F430	East In Ouzzal shear zone	Tirek	West Hoggar	IOGU	granodiorite	40Ar-39Ar	Biotite	613.3	2.2		613,3±2,2	Neo-proterozoic	(650-570 Ma) Pan-African Orogeny	Pan-African Orogeny	Ferkous and Monié, 2002
790	2.59976	21.3897		F430	East In Ouzzal shear zone	Tirek	West Hoggar	IOGU	granodiorite	40Ar-39Ar	Amphibole	622.9	2.4		622,9±2,4	Neo-proterozoic	(650-570 Ma) Pan-African Orogeny	Pan-African Orogeny	Ferkous and Monié, 2002
791	2.50703	21.2151				along the east IOGU shear zone	Adrar des Iforas	IOGU	white micas	40Ar-39Ar	K-feldspar	575			575	Neo-proterozoic	(650-570 Ma) Pan-African Orogeny	Pan-African Orogeny	Ferkous and Monié, 2002
792	2.50703	21.2151				along the east IOGU shear zone	Adrar des Iforas	IOGU	white micas	40Ar-39Ar	K-feldspar	611			611	Neo-proterozoic	(650-570 Ma) Pan-African Orogeny	Pan-African Orogeny	Ferkous and Monié, 2002
793	1.19519	19.211			Ichoualen pluton	Ichoualen	Adrar des Iforas	Kidal	Granite alcalin de Tahrmert	Rb-Sr Isochron	Whole Rock	540			540	Cambrian	(560-520 Ma) Pan-African Orogeny	Post Pan-African Orogeny	Liégeois et Black 1983, 1984
794	1.19519	19.211			Ichoualen pluton	Ichoualen	Adrar des Iforas	Kidal	Granite alcalin de Tahrmert	Rb-Sr Isochron	Whole Rock	560			560	Neo-proterozoic	(560-520 Ma) Pan-African Orogeny	Pan-African Orogeny	Liégeois et Black 1983, 1984
795	1.3184	18.5112			Kidal pluton		Adrar des Iforas	Kidal	granites hyperalcalins-alkalic ring complexes	U-Pb	Zircon	593	6		593±6	Neo-proterozoic	(650-570 Ma) Pan-African Orogeny	Pan-African Orogeny	Ducrot et al., 1979
796	2.17135	19.6161		IF9	UGI		Adrar des Iforas	UGI	granulites-quartzites	U-Pb	Zircon	2120			2120	Paleo-proterozoic	Eburnean Orogeny	Eburnean Orogeny	Lancelot et al., 1983
797	2.17135	19.6161		IF9	UGI		Adrar des Iforas	UGI	granulites-quartzites	U-Pb	Zircon	3000			3000	Archean	Ouzzalian Orogeny	Archean	Lancelot et al., 1983
798	2.17135	19.6161		IF9	UGI		Adrar des Iforas	UGI	granulites-quartzites	U-Pb	Zircon	3300			3300	Archean	Ouzzalian Orogeny	Archean	Lancelot et al., 1983
799	2.17135	19.6161		IF9	UGI		Adrar des Iforas	UGI	granulites-quartzites	U-Pb	Zircon	550			550	Neo-proterozoic	(560-520 Ma) Pan-African Orogeny	Pan-African Orogeny	Lancelot et al., 1983
800	2.17135	19.6161		IF9	UGI		Adrar des Iforas	UGI	granulites-quartzites	U-Pb	Zircon	650			650	Neo-proterozoic	(650-570 Ma) Pan-African Orogeny	Pan-African Orogeny	Lancelot et al., 1983
801	1.83227	19.1681		MYG	calc-alkaline granite (MYG)		Adrar des Iforas	UGI	Mylonitic sub-alkaline leptynite	U-Pb	Zircon	566	8		566±8	Neo-proterozoic	(650-570 Ma) Pan-African Orogeny	Pan-African Orogeny	Lancelot et al., 1983
802	1.82605	19.149		MY3			Adrar des Iforas	UGI	Undeformed sub-alkaline leptynite	39Ar-Ar40	Whole Rock	900			900	Neo-proterozoic	(1100-870 Ma) Pan-African Rifting-Oceanization	Pan-African Oceanization	Lancelot et al., 1983
803	1.82605	19.149		MY10			Adrar des Iforas	UGI	Mylonitic sub-alkaline leptynite	39Ar-Ar40	Whole Rock	535	5		535±5	Cambrian	(560-520 Ma) Pan-African Orogeny	Post Pan-African Orogeny	Lancelot et al., 1983
804	1.82605	19.149		MY6			Adrar des Iforas	UGI	ultramylonitic sub-alkaline leptynite	39Ar-Ar40	Whole Rock	539	5		539±5	Cambrian	(560-520 Ma) Pan-African Orogeny	Post Pan-African Orogeny	Lancelot et al., 1983
805	1.90693	18.7698			Granulites In Ouzzal		Adrar des Iforas	UGI	Granulites-charnockites	Rb-Sr Isochron	Whole Rock	2932			2932	Archean	Ouzzalian Orogeny	Archean	Ferrara and Gravelle, 1966
806	1.90693	18.7698			Granulites In Ouzzal		Adrar des Iforas	UGI	Granulites-charnockites	Rb-Sr Isochron	Whole Rock	3180			3180	Archean	Ouzzalian Orogeny	Archean	Allègre and Caby, 1972
807	1.90693	18.7698			Granulites In Ouzzal		Adrar des Iforas	UGI	granulite facies metamorphism-garnet-whole rock	Sm-Nd	Whole Rock	2100			2100	Paleo-proterozoic	Eburnean Orogeny	Eburnean Orogeny	Ben-Othman et al., 1984
808	1.3184	18.5112			Kidel ring complex	Kidal	Adrar des Iforas	Kidal	Hedenbergite hastingsite perthite granite	U-Pb	Zircon	586	13		586±13	Neo-proterozoic	(650-570 Ma) Pan-African Orogeny	Pan-African Orogeny	Black et al., 1979
809	1.37344	18.0477			O. Teggart Tonalite	O. Teggart	Adrar des Iforas	Kidal	Tonalite	U-Pb	Zircon	693	3		693±3	Neo-proterozoic	(750-665 Ma) Pan-African Orogeny	Pan-African Orogeny	Ducrot et al., 1979
810	2.1646	18.3661			Tamaradant granodiorite	Tamaradant	Adrar des Iforas	Kidal	granodiorite	Rb-Sr	Biotite	642	34		642±34	Neo-proterozoic	(650-570 Ma) Pan-African Orogeny	Pan-African Orogeny	Bertrand et al., 1981
811	2.1646	18.3661			Tamassahart alkali feldspar granite	Tamassahart	Adrar des Iforas	Kidal	granites	Rb-Sr	Biotite	646	37		646±37	Neo-proterozoic	(650-570 Ma) Pan-African Orogeny	Pan-African Orogeny	Bertrand et al., 1981
812	1.87962	19.7977			The In Bezzeg metadiorites	In bezzeg	Adrar des Iforas	Kidal	In bezzeg metadiorite	Rb-Sr	Biotite	598	10		598±10	Neo-proterozoic	(650-570 Ma) Pan-African Orogeny	Pan-African Orogeny	Bertrand et al., 1981
813	2.03891	18.3989			The Tadaït granodiorites	Tadaït	Adrar des Iforas	Kidal	granodiorite	Rb-Sr	Biotite	625	81		625±81	Neo-proterozoic	(650-570 Ma) Pan-African Orogeny	Pan-African Orogeny	Bertrand et al., 1981
814	2.34498	19.4263			The Ibedouyen tonalites and granodiorites	Ibedouyen	Adrar des Iforas	Tirek	Tonalite & granodiorite	Rb-Sr	Biotite	642	84		642±84	Neo-proterozoic	(650-570 Ma) Pan-African Orogeny	Pan-African Orogeny	Bertrand et al., 1981
815	1.54231	20.1734			Tadjoudjemet granodiorites and porphyritic granites	Tadjoudjemet	Adrar des Iforas	Kidal	Granodiorites & porphyritic granite	Rb-Sr	Biotite	614	45		614±45	Neo-proterozoic	(650-570 Ma) Pan-African Orogeny	Pan-African Orogeny	Bertrand et al., 1981
816	1.37382	19.8565			Oumassene granitoids	Oumassene	Adrar des Iforas	Kidal	granitoids, leucodiorite prophyritic granite, tonalite	Rb-Sr	Biotite	611	12		611±12	Neo-proterozoic	(650-570 Ma) Pan-African Orogeny	Pan-African Orogeny	Bertrand et al., 1981
817	1.00451	19.0891			The Aoukenek granite	Aoukenek	Adrar des Iforas	Kidal	porphyritic biotite granite	Rb-Sr	Biotite	570	12		570±12	Neo-proterozoic	(650-570 Ma) Pan-African Orogeny	Pan-African Orogeny	Bertrand et al., 1981
818	1.59033	18.6314			The Tedreq granite	Tedreq	Adrar des Iforas	Kidal	granite	Rb-Sr	Biotite	508	43		508±43	Cambrian	(520-480 Ma) Pan-African Orogeny	Post Pan-African Orogeny	Bertrand et al., 1981
819	1.8424	19.21			the Abeibara granite	Abeibara	Adrar des Iforas	UGI	granite	U-Pb	Zircon	566	8		566±8	Neo-proterozoic	(650-570 Ma) Pan-African Orogeny	Pan-African Orogeny	Bertrand et al., 1981
820	1.8424	19.21			the Abeibara granite	Abeibara	Adrar des Iforas	UGI	granite	39Ar-Ar40	Amphibole	539	10		539±10	Cambrian	(560-520 Ma) Pan-African Orogeny	Post Pan-African Orogeny	Boullier et al., 1979
821	2.34498	19.4263				Ibedouyen	Adrar des Iforas	Tirek	Tonalite & Granodiorite	Rb-Sr Isochron	Whole Rock	642	84		642±84	Neo-proterozoic	(650-570 Ma) Pan-African Orogeny	Pan-African Orogeny	Bertrand et Davison, 1981
822	2.34498	19.4263				Ibedouyen	Adrar des Iforas	Tirek	Tonalite & Granodiorite	Rb-Sr	Biotite	595	12		595±12	Neo-proterozoic	(650-570 Ma) Pan-African Orogeny	Pan-African Orogeny	Bertrand et Davison, 1981
823	2.49088	19.4801				Achamon	Adrar des Iforas	Tirek	granites-granodiorite	U-Pb	Zircon	590	6		590±6	Neo-proterozoic	(650-570 Ma) Pan-African Orogeny	Pan-African Orogeny	Ducrot et al., 1979
824	2.80482	19.5849		A 74 + others 10 samples		Tamassahart	West Hoggar	Tin Zaoutene	Granitoid	Rb-Sr Isochron	Whole Rock	646	37		646±37	Neo-proterozoic	(650-570 Ma) Pan-African Orogeny	Pan-African Orogeny	Bertrand et Davison, 1981
825	2.4778	19.2713		A20	Diorite quartzique d'Ibedouyen	Ibedouyen	Adrar des Iforas	Tirek	diorite quartzique	U-Pb	Zircon	600	2		600±2	Neo-proterozoic	(650-570 Ma) Pan-African Orogeny	Pan-African Orogeny	Caby et al., 1985
826	2.80482	19.5849		A74	granite de Tamassahart	Tamassahart	West Hoggar	Tin Zaoutene	granite	U-Pb	Zircon	581	7	6	581±7-6	Neo-proterozoic	(650-570 Ma) Pan-African Orogeny	Pan-African Orogeny	Caby et al., 1985
827	9.19378	22.1693		Ti 132		Djanet-Tafassasset	East Hoggar	Aouzegueur	Granite-granodiorite	U-Pb	Zircon	729	8		729±8	Neo-proterozoic	(750-665 Ma) Pan-African Orogeny	Pan-African Orogeny	Caby and Andreopoupolos-Renaud, 1987
828	9.19378	22.1693		Ti 132		Djanet-Tafassasset	East Hoggar	Aouzegueur	Granite-granodiorite	U-Pb	Zircon	660	5		660±5	Neo-proterozoic	(750-665 Ma) Pan-African Orogeny	Pan-African Orogeny	Caby and Andreopoupolos-Renaud, 1987
829	8.63242	22.0496		TA10	Tiririne Formation	Djanet-Tafassasset	East Hoggar	Aouzegueur	monzonite dyke	U-Pb	Zircon	660	5		660±5	Neo-proterozoic	(750-665 Ma) Pan-African Orogeny	Pan-African Orogeny	Bertrand et al., 1978
830	8.40548	23.79		Ti68	Adaf pluton (Tiririne Belt)	Adaf	East Hoggar	Aouzegueur	pretectonic sill within the Tiririne Formation-syn-kinematic Adamellite	U-Pb	Zircon	604	13		604±13	Neo-proterozoic	(650-570 Ma) Pan-African Orogeny	Pan-African Orogeny	Bertrand et al., 1978
831	8.41086	23.7656		Ti63	Adaf pluton (Tiririne Belt)	Adaf	East Hoggar	Aouzegueur	pretectonic sill within the Tiririne Formation-post-kinematic porphyritic adamellite	U-Pb	Zircon	585	14		585±14	Neo-proterozoic	(650-570 Ma) Pan-African Orogeny	Pan-African Orogeny	Bertrand et al., 1978
832	2.11644	23.1838		K312		In Tassak	West Hoggar	IOGU		40Ar-39Ar	Biotite	561.4	6.7		561,4±6,7	Neo-proterozoic	(560-520 Ma) Pan-African Orogeny	Pan-African Orogeny	Caby and Monié, 2003
833	2.12403	23.1831		C106	In Tassak kinzigite	In Tassak	West Hoggar	IOGU	Sill complex: troctolite-LT–HT Egatalis	40Ar-39Ar LA	Biotite	571			571	Neo-proterozoic	(650-570 Ma) Pan-African Orogeny	Pan-African Orogeny	Caby and Monié, 2003
834	2.12403	23.1831		C106	In Tassak kinzigite	In Tassak	West Hoggar	IOGU	Sill complex: troctolite-LT–HT Egatalis	40Ar-39Ar LA	Biotite	604			604	Neo-proterozoic	(650-570 Ma) Pan-African Orogeny	Pan-African Orogeny	Caby and Monié, 2003
835	2.12403	23.1831		C106		In Tassak	West Hoggar	IOGU	monazite	U-Pb	Zircon	603			603	Neo-proterozoic	(650-570 Ma) Pan-African Orogeny	Pan-African Orogeny	Bosch et al., 2001
836	2.07123	22.9336		M406		Tideridjaouine	West Hoggar	IOGU	Phengite	40Ar-39Ar	Phengite	588.2	4.9		588,2 ±4,9	Neo-proterozoic	(650-570 Ma) Pan-African Orogeny	Pan-African Orogeny	Caby and Monié, 2003
837	2.00567	22.726		L154			West Hoggar	IOGU	antophyllite	40Ar-39Ar	Amphibole	602.3	6		602,3±6,0	Neo-proterozoic	(650-570 Ma) Pan-African Orogeny	Pan-African Orogeny	Caby and Monié, 2003
838	2.10352	24.339		M775	Ougda volcanic arc		West Hoggar	IOGU	amphibolite	40Ar-39Ar	Amphibole	676.3	6.9		676,3±6,9	Neo-proterozoic	(750-665 Ma) Pan-African Orogeny	Pan-African Orogeny	Caby and Monié, 2003
839	2.22049	24.1633				Ougda complex	West Hoggar	IOGU	Ougda mafic-ultramafic plutonic complex	Rb-Sr	Whole Rock	793	32		793±32	Neo-proterozoic	(840-750) Pan-African Rifting	Pan-African Oceanization	Clauer 1976
840	6.09247	23.8355			Telohat migmatites	Aleksod	LATEA metacraton	Egéré-Aleskod	Granodioritic migmatite	U-Pb	Zircon	2131	12		2131±12	Paleo-proterozoic	Eburnean Orogeny	Eburnean Orogeny	Barbey et al., 1989
841	6.09247	23.8355			Telohat migmatites	Aleksod	LATEA metacraton	Egéré-Aleskod	Granodioritic high-pressure anatexis	U-Pb	Zircon	609	17		609±17	Neo-proterozoic	(650-570 Ma) Pan-African Orogeny	Pan-African Orogeny	Barbey et al., 1989
842	6.43103	23.9056		5a	Arechchoum orthogneisses	Aleksod	LATEA metacraton	Egéré-Aleskod	Banded gneisse & pegmatoid	Rb-Sr Isochron	Whole Rock	2222	60		2222±60	Paleo-proterozoic	Eburnean Orogeny	Eburnean Orogeny	Bertrand and Lasserre, 1976
843	6.53284	23.8539		6a	Arechchoum	Aleksod	LATEA metacraton	Egéré-Aleskod	quartzo-feldspathic gneisses intimately interlayered within metasediments	Rb-Sr Isochron	Whole Rock	2110	40		2110±40	Paleo-proterozoic	Eburnean Orogeny	Eburnean Orogeny	Bertrand and Lasserre, 1976
844	6.19381	23.853		5b	Arechchoum	Aleksod	LATEA metacraton	Egéré-Aleskod	augen gneisses	Rb-Sr Isochron	Whole Rock	1940	50		1940±50	Paleo-proterozoic	Eburnean Orogeny	Eburnean Orogeny	Bertrand and Lasserre, 1976
845	6.24215	23.7414		6b	Aleksod Formation	Aleksod	LATEA metacraton	Egéré-Aleskod	migmatized metasediments	Rb-Sr Isochron	Whole Rock	1050	35		1050±35	Meso-protezozoic	(1100-870 Ma) Pan-African Rifting-Oceanization	Pan-African Oceanization	Bertrand and Lasserre, 1976
846	6.22214	23.8032		5b	Aleksod Formation	Aleksod	LATEA metacraton	Egéré-Aleskod	Blastomylonitic Arechchoum augen gneisses	Rb-Sr Isochron	Whole Rock	910	35		910±35	Neo-proterozoic	(1100-870 Ma) Pan-African Rifting-Oceanization	Pan-African Oceanization	Bertrand and Lasserre, 1976
847	6.53284	23.8539		6a	Aleksod Formation	Aleksod	LATEA metacraton	Egéré-Aleskod	mica-rich gneisses belonging to the Arechchoum Formation	Rb-Sr Isochron	Whole Rock	930	15		930±15	Neo-proterozoic	(1100-870 Ma) Pan-African Rifting-Oceanization	Pan-African Oceanization	Bertrand and Lasserre, 1976
848	6.24215	23.7414		6b	Aleksod Formation	Aleksod	LATEA metacraton	Egéré-Aleskod	hornblendes from amphibolites	K-Ar	Whole Rock	900			900	Neo-proterozoic	(1100-870 Ma) Pan-African Rifting-Oceanization	Pan-African Oceanization	Bertrand and Lasserre, 1976
849	6.24215	23.7414		6b	Aleksod Formation	Aleksod	LATEA metacraton	Egéré-Aleskod	hornblendes from amphibolites	K-Ar	Whole Rock	1000			1000	Neo-proterozoic	(1100-870 Ma) Pan-African Rifting-Oceanization	Pan-African Oceanization	Bertrand and Lasserre, 1976
850	6.55499	23.6525		5c	Granite Serkout	Aleksod	LATEA metacraton	Egéré-Aleskod	granodiorite	Rb-Sr Isochron	Whole Rock	500			500	Cambrian	(520-480 Ma) Pan-African Orogeny	Post Pan-African Orogeny	Bertrand and Lasserre, 1976
851	6.55499	23.6525		5c	Granite Serkout	Aleksod	LATEA metacraton	Egéré-Aleskod	granodiorite	Rb-Sr Isochron	Whole Rock	580			580	Neo-proterozoic	(650-570 Ma) Pan-African Orogeny	Pan-African Orogeny	Bertrand and Lasserre, 1976
852	2.5	23.5		8	In Zize rhyolites	In Zize	West Hoggar	IOGU	Rhyolite	Rb-Sr Isochron	Whole Rock	500			500	Cambrian	(520-480 Ma) Pan-African Orogeny	Post Pan-African Orogeny	Allègre and Caby, 1972
853	2.5	23.5			In Zize rhyolites	In Zize	West Hoggar	IOGU	Rhyolite	Rb-Sr	Whole Rock	538	30		538±30	Cambrian	(560-520 Ma) Pan-African Orogeny	Post Pan-African Orogeny	Cahen et al., 1984
854	2.5	23.5		9	In Zize rhyolitic complex	In Zize	West Hoggar	IOGU	Rhyolite	U-Pb	Zircon	550	30		550±30	Neo-proterozoic	(560-520 Ma) Pan-African Orogeny	Pan-African Orogeny	Picciotto et al., 1965
855	4.22293	22.8055		15		Tioueine	West Hoggar	Iskel	Granite	Rb-Sr Isochron	Whole Rock	560	40		560±40	Neo-proterozoic	(560-520 Ma) Pan-African Orogeny	Pan-African Orogeny	Boissonnas et al., 1969
856	4.22293	22.8055		15		Tioueine	West Hoggar	Iskel	Granite	Rb-Sr Isochron	Whole Rock	564	40		564±40	Neo-proterozoic	(560-520 Ma) Pan-African Orogeny	Pan-African Orogeny	Boissonnas et al., 1969
857	4.22293	22.8055			Tioueine pluton	Tioueine	West Hoggar	Iskel	granite	Rb-Sr Isochron	Whole Rock	575	12		575±12	Neo-proterozoic	(650-570 Ma) Pan-African Orogeny	Pan-African Orogeny	Boissonnas et al., 1969
858	4.22684	22.7747		J22	Tioueine pluton	Tioueine	West Hoggar	Iskel	granite (quartz syenite)	Pb-Pb	Whole Rock	523	1		523±1	Cambrian	(560-520 Ma) Pan-African Orogeny	Post Pan-African Orogeny	Paquette et al., 1998
859	7.27513	25.0996			Gour Oumelalen granulitic basement	Gour Oumelalen	LATEA metacraton	Egéré-Aleskod	granulitic (red gneiss complex)	U-Pb SIMS & TIMS	Zircon	2700			2700	Archean	Liberian Orogeny	Archean	Dareni et al., 2007;Latouche, 1978
860	7.27513	25.0996			Gour Oumelalen granulitic basement	Gour Oumelalen	LATEA metacraton	Egéré-Aleskod	granulitic (red gneiss complex)	Sm-Nd TDM	Whole Rock	3000			3000	Archean	Ouzzalian Orogeny	Archean	Dareni et al., 2007;Latouche, 1978
861	7.27513	25.0996			Gour Oumelalen granulitic basement	Gour Oumelalen	LATEA metacraton	Egéré-Aleskod	granulitic (red gneiss complex)	Sm-Nd TDM	Whole Rock	3200			3200	Archean	Ouzzalian Orogeny	Archean	Dareni et al., 2007;Latouche, 1978
862	7.2306	24.9614		28	Tissellilline	Gour Oumelalen	LATEA metacraton	Egéré-Aleskod	Tissellilline post-kinematic granite post-kinematic granite	Rb-Sr Isochron	Whole Rock	570			570	Neo-proterozoic	(650-570 Ma) Pan-African Orogeny	Pan-African Orogeny	Latouche and Vidal, 1974
863	7.27513	25.0996		29		Gour Oumelalen	LATEA metacraton	Egéré-Aleskod	hypersthene-bearing pegmatords and leucogranulites	Rb-Sr Isochron	Whole Rock	1870	30		1870±30	Paleo-proterozoic	Eburnean Orogeny	Eburnean Orogeny	Latouche and Vidal, 1974
864	7.27513	25.0996		30		Gour Oumelalen	LATEA metacraton	Egéré-Aleskod	gneisses and granulites	Rb-Sr Isochron	Whole Rock	2000			2000	Paleo-proterozoic	Eburnean Orogeny	Eburnean Orogeny	Latouche and Vidal, 1974
865	2.08535	19.8618		IC59	Orthogneiss de Tin Elor	Tin Elor	Adrar des Iforas	Kidal	orthogneiss sub-alcalin	U-Pb	Zircon	1837	17	9	1837± 17-9	Paleo-proterozoic	Eburnean Orogeny	Eburnean Orogeny	Caby and Andreopoulos-Renaud, 1983
866	2.35913	23.0386		M519		Adrar Tideridjaouine	West Hoggar	Tassendjanet	rnetarhyolite sub-alcaline-metarhyolite rouge	U-Pb	Zircon	1755	10		1755±10	Paleo-proterozoic	Eburnean Orogeny	Eburnean Orogeny	Caby and Andreopoulos-Renaud, 1983
867	2.35913	23.0386				Adrar Tideridjaouine	West Hoggar	Tassendjanet	metarhyolite	Fission Track	Zircon	594	18		594±18	Neo-proterozoic	(650-570 Ma) Pan-African Orogeny	Pan-African Orogeny	Carpena, 1982
868	2.08535	19.8618			Orthogneiss de Tin Elor		Adrar des Iforas	Kidal	Orthogneiss de Tin Elor	Fission Track	Whole Rock	1317	45		1317±45	Meso-protezozoic	(1600-1200) Pre-Pan-African	Ante-Pan-African	Carpena, 1982
869	4.82632	21.8536			Aouilene monzo-granitic batholith	Aouilene	LATEA metacraton	Laouni	Aouilene monzo-granitic batholith	U-Pb	Zircon	629	6		629±6	Neo-proterozoic	(650-570 Ma) Pan-African Orogeny	Pan-African Orogeny	Bertrand et al., 1986
870	4.82632	21.8536			Aouilene monzo-granitic batholith	Aouilene	LATEA metacraton	Laouni	Aouilene monzo-granitic batholith	U-Pb	Sphene	614	6		614±6	Neo-proterozoic	(650-570 Ma) Pan-African Orogeny	Pan-African Orogeny	Bertrand et al., 1986
871	4.82632	21.8536			Aouilene monzo-granitic batholith		LATEA metacraton	Laouni	Aouilene monzo-granitic batholith	U-Pb	Zircon	651			651	Neo-proterozoic	(650-570 Ma) Pan-African Orogeny	Pan-African Orogeny	Bertrand, unpublished, written communication, 1994
872	3.84192	21.7936			syn-kinematic calc-alkaline batholith	Immezzarene	West Hoggar	In Teidini	Calc-alkaline batholith	U-Pb	Zircon	583	7		583±7	Neo-proterozoic	(650-570 Ma) Pan-African Orogeny	Pan-African Orogeny	Bertrand et al., 1986
873	4.17126	22.3684			Iskel Granite	Iskel	West Hoggar	Iskel	Granite	Rb-Sr Isochron	Whole Rock	592	20		592±20	Neo-proterozoic	(650-570 Ma) Pan-African Orogeny	Pan-African Orogeny	Briedj, 1993 (thèse)
874	7.27513	25.0996			Gour Oumélalène	Oumelalène-Témasint	LATEA metacraton	Egéré-Aleskod	Charnockite & metasédiment	Rb-Sr	Whole Rock	1845	190		1845±190	Paleo-proterozoic	Eburnean Orogeny	Eburnean Orogeny	Latouche et Vidal 1974
875	7.27513	25.0996			Gour Oumélalène	Oumelalène-Témasint	LATEA metacraton	Egéré-Aleskod	leptynites	Rb-Sr	Whole Rock	1975	20		1975±20	Paleo-proterozoic	Eburnean Orogeny	Eburnean Orogeny	Latouche et Vidal 1974
876	7.27513	25.0996			Gour Oumélalène	Oumelalène-Témasint	LATEA metacraton	Egéré-Aleskod	pegmatites à hypersthène	Rb-Sr	Whole Rock	2025	57		2025±57	Paleo-proterozoic	Eburnean Orogeny	Eburnean Orogeny	Latouche et Vidal 1974
877	6.71479	22.9324			Adjemamaye granite	Aghefsa	LATEA metacraton	Egéré-Aleskod	Granite	Rb-Sr Isochron	Whole Rock	510	15		510±15	Cambrian	(520-480 Ma) Pan-African Orogeny	Post Pan-African Orogeny	Boissonnas et al 1970
878	6.78281	22.406			Issouagh Rhyolites	Issouagh	LATEA metacraton	Egéré-Aleskod	les rhyolites de l'Issouagh	Rb-Sr Isochron	Whole Rock	583	3		583±3	Neo-proterozoic	(650-570 Ma) Pan-African Orogeny	Pan-African Orogeny	Briedj, 1993 (thèse)
879	5.63343	24.1678		six samples	In Ozzaf granite	near the Allioum gabbro mass and in the wadi Djif Amane	LATEA metacraton	Tefedest	Granite	Rb-Sr Isochron	Whole Rock	670	20		670±20	Neo-proterozoic	(750-665 Ma) Pan-African Orogeny	Pan-African Orogeny	Vialette and Vitel, 1979
880	5.34507	24.1395		nine samples	In Teferkit pluton	In Teferkit	LATEA metacraton	Tefedest	biotite muscovite granite	Rb-Sr Isochron	Whole Rock	546	9		546±9	Neo-proterozoic	(560-520 Ma) Pan-African Orogeny	Pan-African Orogeny	Vialette and Vitel, 1979
881	5.58611	24.2889		Five samples	In Akoulmou granite	In Akoulmou	LATEA metacraton	Tefedest	Calc-alkalic granite	Rb-Sr Isochron	Whole Rock	514	20		514±20	Cambrian	(520-480 Ma) Pan-African Orogeny	Post Pan-African Orogeny	Vialette and Vitel, 1979
882	5.58611	24.2889			In Akoulmou granite	In Akoulmou	LATEA metacraton	Tefedest	Calc-alkalic granite	Rb-Sr	Biotite	430	10		430±10	Silurian	Silurian "Caledonian"	Caledonian Orogeny	Boissonnas et al., 1964
883	3.04444	22.7722		H 18-6p 161		Adrar-Tanezrouft Zone	West Hoggar	IOGU	Granite	Rb-Sr Isochron	Whole Rock	2764	138		2764±138	Archean	Ouzzalian Orogeny	Archean	Ferrara and Gravelle, 1966
884	3.09722	22.8694		H 18-5p 167		Adrar-Tanezrouft Zone	West Hoggar	IOGU	Granite	Rb-Sr Isochron	Whole Rock	2747	137		2747±137	Archean	Ouzzalian Orogeny	Archean	Ferrara and Gravelle, 1966
885	3.10556	22.8722		H 18-6p 167		Adrar-Tanezrouft Zone	West Hoggar	IOGU	Granite In-Ouzzal facies	Rb-Sr Isochron	Whole Rock	2711	135		2711±135	Archean	Ouzzalian Orogeny	Archean	Ferrara and Gravelle, 1966
886	3.19722	22.975		H 18-7p 168		Adrar-Tanezrouft Zone	West Hoggar	IOGU	Granite	Rb-Sr Isochron	Whole Rock	1788	54		1788±54	Paleo-proterozoic	Eburnean Orogeny	Eburnean Orogeny	Ferrara and Gravelle, 1966
887	3.19722	22.975		H 18-7p 168		Adrar-Tanezrouft Zone	West Hoggar	IOGU	Granite	K-Ar	Whole Rock	1750	52		1750±52	Paleo-proterozoic	Eburnean Orogeny	Eburnean Orogeny	Ferrara and Gravelle, 1966
888	2.71111	22.9333		H 19-1p 59		Adrar-Tanezrouft Zone	West Hoggar	IOGU	Calc.-alkaline syenite	Rb-Sr	Whole Rock	N/D			N/D				Ferrara and Gravelle, 1966
889	3.25556	23.5972		H 19-2p 29		Adrar-Tanezrouft Zone	West Hoggar	IOGU	Hypersthene bearing granitic gneiss	Rb-Sr	Whole Rock	N/D			N/D				Ferrara and Gravelle, 1966
890	3.13889	23.4583		H 19-1p 35		Adrar-Tanezrouft Zone	West Hoggar	IOGU	Coarse grained biotite pyroxenite	Rb-Sr Isochron	Whole Rock	1836	55		1836±55	Paleo-proterozoic	Eburnean Orogeny	Eburnean Orogeny	Ferrara and Gravelle, 1966
891	3.13889	23.4583		H 19-1p 35		Adrar-Tanezrouft Zone	West Hoggar	IOGU	Coarse grained biotite pyroxenite	K-Ar	Whole Rock	1690	50		1690±50	Paleo-proterozoic	Eburnean Orogeny	Eburnean Orogeny	Ferrara and Gravelle, 1966
892	3.13889	23.4583		H 19-2p 35		Adrar-Tanezrouft Zone	West Hoggar	IOGU	Coarse grained biotite gneiss grading to banded pegmatite	Rb-Sr Isochron	Whole Rock	1769	53		1769±53	Paleo-proterozoic	Eburnean Orogeny	Eburnean Orogeny	Ferrara and Gravelle, 1966
893	3.13889	23.4583		H 19-2p 35		Adrar-Tanezrouft Zone	West Hoggar	IOGU	Coarse grained biotite gneiss grading to banded pegmatite	K-Ar	Whole Rock	1765	53		1765±53	Paleo-proterozoic	Eburnean Orogeny	Eburnean Orogeny	Ferrara and Gravelle, 1966
894	2.49167	23.1111		H 19-2p 55		Adrar-Tanezrouft Zone	West Hoggar	IOGU	Granitoid:gneiss In-Ouzzal facies	Rb-Sr	Whole Rock	N/D			N/D				Ferrara and Gravelle, 1966
895	3.04444	22.7722		All samples		Adrar-Tanezrouft Zone	West Hoggar	IOGU	All samples	Rb-Sr Isochron	Whole Rock	2860			2860	Archean	Ouzzalian Orogeny	Archean	Ferrara and Gravelle, 1966
896	2.80811	22.8923		Tek 58			West Hoggar	IOGU	Al-Mg-rich granulitic gneiss	40Ar-39Ar LA	Biotite	1775	25		1775±25	Paleo-proterozoic	Eburnean Orogeny	Eburnean Orogeny	Maluski et al., 1990
897	2.79569	23.3277		M408		In Ouzzal	West Hoggar	IOGU	Charnockite	Nd-Sm	Whole Rock	3123			3123	Archean	Ouzzalian Orogeny	Archean	Ben Othman et al., 1984
898	2.79569	23.3277		M408		In Ouzzal	West Hoggar	IOGU	Charnockite	Pb-Pb	Zircon	3100			3100	Archean	Ouzzalian Orogeny	Archean	Ben Othman et al., 1984
899	2.79569	23.3277		M408		In Ouzzal	West Hoggar	IOGU	Charnockite	Nd-Sm	Whole Rock	2100			2100	Paleo-proterozoic	Eburnean Orogeny	Eburnean Orogeny	Ben Othman et al., 1984
900	-1.71469	23.2286		152A	Dyke de Fersiga	Fersiga	CAMP	Reggane	Basalte doleritic dyke	40Ar-39Ar	Whole Rock	197.4	2		197,4±2	Jurassic	Jurassic Pangea break-up (CAMP)	Jurassic Pangea break-up (CAMP)	Chabou et al., 2007
901	1.15868	24.7332		S29	Sill de Reggane	Reggane	CAMP	Reggane	Basalte doleritic sill	40Ar-39Ar	Whole Rock	195	1.6		195±1,6	Jurassic	Jurassic Pangea break-up (CAMP)	Jurassic Pangea break-up (CAMP)	Chabou et al., 2007
902	-3.38471	25.084		Hk3	Sill du Hank	Hank		Yetti-Eglab	Basalte doleritic sill	40Ar-39Ar	Whole Rock	197.9	2		197,9±2	Jurassic	Jurassic Pangea break-up (CAMP)	Jurassic Pangea break-up (CAMP)	Chabou et al., 2007
903	0.415058	25.248		Rg1	Sill de Reggane	Reggane	CAMP	Reggane	Basalte doleritic sill	40Ar-39Ar	Whole Rock	197.1	6		197,1±6	Jurassic	Jurassic Pangea break-up (CAMP)	Jurassic Pangea break-up (CAMP)	Chabou et al., 2007
904	-6.18638	27.6355		GSL3a	Sill tindouf	Tindouf		Tindouf	Doleritic basalte	40Ar-39Ar	Whole Rock	198.9	1.8		198,9±1,8	Jurassic	Jurassic Pangea break-up (CAMP)	Jurassic Pangea break-up (CAMP)	Chabou et al., 2007
905	-3.93455	30.6947		Zr1	Coulée de Béchar	Béchar		Béchar	Doleritic basalte	40Ar-39Ar	Whole Rock	192.7	3		192,7±3	Jurassic	Jurassic Pangea break-up (CAMP)	Jurassic Pangea break-up (CAMP)	Chabou et al., 2007
906	-3.89118	30.7705		779A	Coulée de Béchar	Béchar		Béchar	Doleritic basalte	40Ar-39Ar	Whole Rock	197.4	2		197,4±2	Jurassic	Jurassic Pangea break-up (CAMP)	Jurassic Pangea break-up (CAMP)	Chabou et al., 2007
907	5.7027	22.7924		OT etc…	In Tounine pluton	In Tounine	LATEA metacraton	Laouni	Granite hyper Al	Rb-Sr Isochron	Whole Rock	521	17		521±17	Cambrian	(560-520 Ma) Pan-African Orogeny	Post Pan-African Orogeny	Cheilletz et al., 1992
908	5.89536	22.8802		OT etc…	Ahelehedj pluton	Ahelehedj	LATEA metacraton	Laouni	Granite hyper Al	Rb-Sr	Whole Rock	539			539	Cambrian	(560-520 Ma) Pan-African Orogeny	Post Pan-African Orogeny	Cheilletz et al., 1992
909	5.80512	22.5723		OT etc…	Anfeg pluton	Anfeg	LATEA metacraton	Laouni	Granite subalkaline	40Ar-39Ar	Whole Rock	615			615	Neo-proterozoic	(650-570 Ma) Pan-African Orogeny	Pan-African Orogeny	Cheilletz et al., 1992
910	5.51817	22.6361		OT etc…	Tifferkit pluton	Tifferkit	LATEA metacraton	Laouni	Granite subalkaline	40Ar-39Ar	Whole Rock	576			576	Neo-proterozoic	(650-570 Ma) Pan-African Orogeny	Pan-African Orogeny	Cheilletz et al., 1992
911	5.75644	22.709		LH157	Debnat pluton	Debnat	LATEA metacraton	Laouni	Granite	40Ar-39Ar	Whole Rock	538	2.4		538±2,4	Cambrian	(560-520 Ma) Pan-African Orogeny	Post Pan-African Orogeny	Cheilletz et al., 1992
912	5.54002	22.6107		L35	Tin Amzo El Karoussa pluton	Tin Amzo El Karoussa	LATEA metacraton	Laouni	Granite	Sn-W & Ar-Ar	Whole Rock	536	2.2		536±2,2	Cambrian	(560-520 Ma) Pan-African Orogeny	Post Pan-African Orogeny	Cheilletz et al., 1992
913	9.94936	24.1464			Mariaou-Tiska pluton	Adrar Mariaou-Tiska	East Hoggar	Edembo	Granitoide	U-Pb	Zircon	1200			1200	Meso-protezozoic	(1600-1200) Pre-Pan-African	Ante-Pan-African	Cherfouh et al., 2003
914	9.94936	24.1464			Mariaou-Tiska pluton	Adrar Mariaou-Tiska	East Hoggar	Edembo	Granitoide	U-Pb	Zircon	1300			1300	Meso-protezozoic	(1600-1200) Pre-Pan-African	Ante-Pan-African	Cherfouh et al., 2003
915	5.17134	20.6951			WL-noritic		LATEA metacraton	Laouni	ultra-mafic intrusion-tholeiitic magmatism	Sm-Nd & Rb-Sr TDM	Whole Rock	2919			2919	Archean	Ouzzalian Orogeny	Archean	Cottin et al., 1998
916	5.17134	20.6951			WL-noritic		LATEA metacraton	Laouni	ultra-mafic intrusion-tholeiitic magmatism	Sm-Nd & Rb-Sr TDM	Whole Rock	2142			2142	Paleo-proterozoic	Eburnean Orogeny	Eburnean Orogeny	Cottin et al., 1998
917	5.22474	20.6641			WL-troctolitic		LATEA metacraton	Laouni	ultra-mafic intrusion-tholeiitic magmatism	Sm-Nd & Rb-Sr TDM	Whole Rock	1150			1150	Meso-protezozoic	(1600-1200) Pre-Pan-African	Ante-Pan-African	Cottin et al., 1998
918	5.22474	20.6641			WL-troctolitic		LATEA metacraton	Laouni	ultra-mafic intrusion-tholeiitic magmatism	Sm-Nd & Rb-Sr TDM	Whole Rock	1167			1167	Meso-protezozoic	(1600-1200) Pre-Pan-African	Ante-Pan-African	Cottin et al., 1998
919	5.65221	20.655			LW-Troctolitic		LATEA metacraton	Laouni	ultra-mafic intrusion-tholeiitic magmatism	Sm-Nd & Rb-Sr TDM	Whole Rock	1353			1353	Meso-protezozoic	(1600-1200) Pre-Pan-African	Ante-Pan-African	Cottin et al., 1998
920	5.65221	20.655			LW-Troctolitic		LATEA metacraton	Laouni	ultra-mafic intrusion-tholeiitic magmatism	Sm-Nd & Rb-Sr TDM	Whole Rock	952			952	Neo-proterozoic	(1100-870 Ma) Pan-African Rifting-Oceanization	Pan-African Oceanization	Cottin et al., 1998
921	5.34595	21.7857			Les séries primaires des Tassilis Oua-n-Ahaggar	Tin Begane	LATEA metacraton	Laouni	Eclogite	Sm-Nd	Whole Rock	686	19		686±19	Neo-proterozoic	(750-665 Ma) Pan-African Orogeny	Pan-African Orogeny	Boughrara, 1999; Latouche et al., 2000
922	7.39167	21.0097		D1	Les séries primaires des Tassilis Oua-n-Ahaggar	synclinal de Tin Serririne		Tin Serririne	Dolerite	40Ar-39Ar	Whole Rock	347.6	16.2		347,6±16,2	Carboniferous	Carboniferous "Hercynian"	Hercyniann Orogeny	Djellit et al., 2006
923	7.38889	21.0444		D3	Les séries primaires des Tassilis Oua-n-Ahaggar	synclinal de Tin Serririne		Tin Serririne	Dolerite	40Ar-39Ar	Whole Rock	345	16		345±16	Carboniferous	Carboniferous "Hercynian"	Hercyniann Orogeny	Djellit et al., 2006
924	7.39167	21.0942		DH	Les séries primaires des Tassilis Oua-n-Ahaggar	synclinal de Tin Serririne		Tin Serririne	Dolerite	40Ar-39Ar	Whole Rock	350.3	16		350,3±16	Carboniferous	Carboniferous "Hercynian"	Hercyniann Orogeny	Djellit et al., 2006
925	2.50605	21.2283		BONE1, BONE2		Lardjane-Bouadjla	West Hoggar	IOGU	Quartz dyke (Galena-Au)	Pb-Pb	Zircon	1970			1970	Paleo-proterozoic	Eburnean Orogeny	Eburnean Orogeny	Semiani, 1996
926	2.50698	21.2136		BON1		Lardjane-Bouadjla	West Hoggar	IOGU	Quartz dyke (Galena-Au)	Pb-Pb	Zircon	2010			2010	Paleo-proterozoic	Eburnean Orogeny	Eburnean Orogeny	Semiani, 1996
927	2.52336	21.2639		LA1		Lardjane-Bouadjla	West Hoggar	IOGU	Quartz dyke (Galena-Au)	Pb-Pb	Zircon	2020			2020	Paleo-proterozoic	Eburnean Orogeny	Eburnean Orogeny	Semiani, 1996
928	2.52279	21.2865		TN3		Lardjane-Bouadjla	West Hoggar	IOGU	Quartz dyke (Galena-Au)	Pb-Pb	Zircon	1970			1970	Paleo-proterozoic	Eburnean Orogeny	Eburnean Orogeny	Semiani, 1996
929	2.52279	21.2865		TSNE2		Lardjane-Bouadjla	West Hoggar	IOGU	Quartz dyke (Galena-Au)	Pb-Pb	Zircon	1840			1840	Paleo-proterozoic	Eburnean Orogeny	Eburnean Orogeny	Semiani, 1996
930	2.49555	21.1137		AM1		Amesmessa	West Hoggar	IOGU	Quartz dyke (Galena-Au)	Pb-Pb	Zircon	2060			2060	Paleo-proterozoic	Eburnean Orogeny	Eburnean Orogeny	Semiani, 1996
931	2.58027	21.6251		SY1	Faille intra-Ouzzalienne	Kiouene	West Hoggar	IOGU	Syenite quartzite	Pb-Pb	Zircon	1760			1760	Paleo-proterozoic	Eburnean Orogeny	Eburnean Orogeny	Semiani, 1996
932	-1.19851	29.2204		J-102A-Flow		Sebkha El Melah	Ougarta	Sbâa	mafic lava flows	Sm-Nd TDM	Whole Rock	948			948	Neo-proterozoic	(1100-870 Ma) Pan-African Rifting-Oceanization	Pan-African Oceanization	Dostal et al., 2002
933	-1.19851	29.2204		J-103A-Flow		Sebkha El Melah	Ougarta	Sbâa	mafic lava flows	Sm-Nd TDM	Whole Rock	987			987	Neo-proterozoic	(1100-870 Ma) Pan-African Rifting-Oceanization	Pan-African Oceanization	Dostal et al., 2002
934	-1.19851	29.2204		J-104-Flow		Sebkha El Melah	Ougarta	Sbâa	mafic lava flows	Sm-Nd TDM	Whole Rock	1033			1033	Meso-protezozoic	(1100-870 Ma) Pan-African Rifting-Oceanization	Pan-African Oceanization	Dostal et al., 2002
935	-1.34931	29.3068		J-144A-Dike		Sebkha El Melah	Ougarta	Sbâa	volcanic rocks volcanic-plutonic rocks	Sm-Nd TDM	Whole Rock	1123			1123	Meso-protezozoic	(1600-1200) Pre-Pan-African	Ante-Pan-African	Dostal et al., 2002
936	-1.34931	29.3068		J-139B-Sill		Sebkha El Melah	Ougarta	Sbâa	volcanic rocks volcanic-plutonic rocks	Sm-Nd TDM	Whole Rock	1206			1206	Meso-protezozoic	(1600-1200) Pre-Pan-African	Ante-Pan-African	Dostal et al., 2002
937	2.11908	22.5554			Tin Zebane dyke swarm	Tin Zebane	West Hoggar	Tassendjanet	Dyke	Rb-Sr Isochron	Whole Rock	592.2	5.8		592,2 ± 5,8	Neo-proterozoic	(650-570 Ma) Pan-African Orogeny	Pan-African Orogeny	Hadj-Kaddour et al., 1998
938	2.11908	22.5554			Tin Zebane dyke swarm	Tin Zebane	West Hoggar	Tassendjanet	Dyke	Sr-Nd PREMA	Whole Rock	646	37		646±37	Neo-proterozoic	(650-570 Ma) Pan-African Orogeny	Pan-African Orogeny	Hadj-Kaddour et al., 1998
939	2.11908	22.5554			Tin Zebane dyke swarm	Tin Zebane	West Hoggar	Tassendjanet	Dyke	Sr-Nd PREMA	Whole Rock	815	43		815±43	Neo-proterozoic	(840-750) Pan-African Rifting	Pan-African Oceanization	Hadj-Kaddour et al., 1998
940	2.12653	22.5347		188.2		Tin Zebane	West Hoggar	Tassendjanet	gabbro	Sm-Nd TDM	Whole Rock	2015			2015	Paleo-proterozoic	Eburnean Orogeny	Eburnean Orogeny	Hadj-Kaddour et al., 1998
941	2.12653	22.5347		533		Tin Zebane	West Hoggar	Tassendjanet	gabbro	Sm-Nd TDM	Whole Rock	939			939	Neo-proterozoic	(1100-870 Ma) Pan-African Rifting-Oceanization	Pan-African Oceanization	Hadj-Kaddour et al., 1998
942	2.12653	22.5347		532		Tin Zebane	West Hoggar	Tassendjanet	Quartz monzonite	Sm-Nd TDM	Whole Rock	776			776	Neo-proterozoic	(840-750) Pan-African Rifting	Pan-African Oceanization	Hadj-Kaddour et al., 1998
943	2.12653	22.5347		545.1		Tin Zebane	West Hoggar	Tassendjanet	peralkaline granite	Sm-Nd TDM	Whole Rock	938			938	Neo-proterozoic	(1100-870 Ma) Pan-African Rifting-Oceanization	Pan-African Oceanization	Hadj-Kaddour et al., 1998
944	2.12653	22.5347		540.1		Tin Zebane	West Hoggar	Tassendjanet	peralkaline granite	Sm-Nd TDM	Whole Rock	752			752	Neo-proterozoic	(750-665 Ma) Pan-African Orogeny	Pan-African Oceanization	Hadj-Kaddour et al., 1998
945	2.12653	22.5347		546		Tin Zebane	West Hoggar	Tassendjanet	peralkaline granite	Sm-Nd TDM	Whole Rock	754			754	Neo-proterozoic	(750-665 Ma) Pan-African Orogeny	Pan-African Oceanization	Hadj-Kaddour et al., 1998
946	2.12653	22.5347		545.2		Tin Zebane	West Hoggar	Tassendjanet	peralkaline granite	Sm-Nd TDM	Whole Rock	867			867	Neo-proterozoic	(870-840 Ma) Pan-African Rifting	Pan-African Oceanization	Hadj-Kaddour et al., 1998
947	2.12653	22.5347		269.6		Tin Zebane	West Hoggar	Tassendjanet	peralkaline granite	Sm-Nd TDM	Whole Rock	680			680	Neo-proterozoic	(750-665 Ma) Pan-African Orogeny	Pan-African Orogeny	Hadj-Kaddour et al., 1998
948	2.12653	22.5347		269.4		Tin Zebane	West Hoggar	Tassendjanet	peralkaline granite	Sm-Nd TDM	Whole Rock	696			696	Neo-proterozoic	(750-665 Ma) Pan-African Orogeny	Pan-African Orogeny	Hadj-Kaddour et al., 1998
949	2.12653	22.5347		545		Tin Zebane	West Hoggar	Tassendjanet	peralkaline granite	Sm-Nd TDM	Whole Rock	939			939	Neo-proterozoic	(1100-870 Ma) Pan-African Rifting-Oceanization	Pan-African Oceanization	Hadj-Kaddour et al., 1998
950	2.12653	22.5347		269.2		Tin Zebane	West Hoggar	Tassendjanet	peralkaline granite	Sm-Nd TDM	Whole Rock	870			870	Neo-proterozoic	(870-840 Ma) Pan-African Rifting	Pan-African Oceanization	Hadj-Kaddour et al., 1998
951	2.12653	22.5347		534.1		Tin Zebane	West Hoggar	Tassendjanet	metaluminous granite	Sm-Nd TDM	Whole Rock	825			825	Neo-proterozoic	(840-750) Pan-African Rifting	Pan-African Oceanization	Hadj-Kaddour et al., 1998
952	2.12653	22.5347		526		Tin Zebane	West Hoggar	Tassendjanet	metaluminous granite	Sm-Nd TDM	Whole Rock	796			796	Neo-proterozoic	(840-750) Pan-African Rifting	Pan-African Oceanization	Hadj-Kaddour et al., 1998
953	2.12653	22.5347		538.2		Tin Zebane	West Hoggar	Tassendjanet	metaluminous granite	Sm-Nd TDM	Whole Rock	2167			2167	Paleo-proterozoic	Eburnean Orogeny	Eburnean Orogeny	Hadj-Kaddour et al., 1998
954	2.12653	22.5347		525.1		Tin Zebane	West Hoggar	Tassendjanet	metaluminous granite	Sm-Nd TDM	Whole Rock	714			714	Neo-proterozoic	(750-665 Ma) Pan-African Orogeny	Pan-African Orogeny	Hadj-Kaddour et al., 1998
955	2.12653	22.5347		531.1		Tin Zebane	West Hoggar	Tassendjanet	metaluminous granite with granophyric texture	Sm-Nd TDM	Whole Rock	873			873	Neo-proterozoic	(1100-870 Ma) Pan-African Rifting-Oceanization	Pan-African Oceanization	Hadj-Kaddour et al., 1998
956	2.12653	22.5347		527.1		Tin Zebane	West Hoggar	Tassendjanet	metaluminous granite with granophyric texture	Sm-Nd TDM	Whole Rock	475			475	Ordovician	Ordovician "Taconic"	Post Pan-African Orogeny	Hadj-Kaddour et al., 1998
957	2.12653	22.5347		180		Tin Zebane	West Hoggar	Tassendjanet	metaluminous granite with granophyric texture	Sm-Nd TDM	Whole Rock	922			922	Neo-proterozoic	(1100-870 Ma) Pan-African Rifting-Oceanization	Pan-African Oceanization	Hadj-Kaddour et al., 1998
958	2.12653	22.5347		183		Tin Zebane	West Hoggar	Tassendjanet	granite from the metasomatic group	Sm-Nd TDM	Whole Rock	663			663	Neo-proterozoic	(750-665 Ma) Pan-African Orogeny	Pan-African Orogeny	Hadj-Kaddour et al., 1998
959	2.12653	22.5347		531		Tin Zebane	West Hoggar	Tassendjanet	with granophyric texture from the metasomatic group	Sm-Nd TDM	Whole Rock	812			812	Neo-proterozoic	(840-750) Pan-African Rifting	Pan-African Oceanization	Hadj-Kaddour et al., 1998
960	2.12653	22.5347		531.2		Tin Zebane	West Hoggar	Tassendjanet	rhyolite from the metasomatic group	Sm-Nd TDM	Whole Rock	848			848	Neo-proterozoic	(870-840 Ma) Pan-African Rifting	Pan-African Oceanization	Hadj-Kaddour et al., 1998
961	8.55206	22.6618		DAZ01	Oued Touffok pluton	Oued Touffok (site TA27)	East Hoggar	Aouzegueur	Granite	U–Pb LA-ICP-MS	Zircon	793	4		793±4	Neo-proterozoic	(840-750) Pan-African Rifting	Pan-African Oceanization	Henry et al., 2009
962	8.54698	22.328		DAZ03	Arigher batholith	Arigher (site TA49)	East Hoggar	Aouzegueur	Granite	U–Pb LA-ICP-MS	Zircon	554	5		554±5	Neo-proterozoic	(560-520 Ma) Pan-African Orogeny	Pan-African Orogeny	Henry et al., 2009
963	8.55388	22.0643		DAZ04	Ohergehem pluton	Ohergehem (site TA16)	East Hoggar	Aouzegueur	Granite	U–Pb LA-ICP-MS	Zircon	594	4		594±4	Neo-proterozoic	(650-570 Ma) Pan-African Orogeny	Pan-African Orogeny	Henry et al., 2009
964	8.02142	23.5134			The Honag pluton	Honag	East Hoggar	Aouzegueur	Granite	U–Pb LA-ICP-MS	Zircon	593	17		593±17	Neo-proterozoic	(650-570 Ma) Pan-African Orogeny	Pan-African Orogeny	Henry et al., 2009
965	8.54698	22.328			Arigher batholith	Arigher	East Hoggar	Aouzegueur	Granite	Rb-Sr Isochron	Whole Rock	553	20		553±20	Neo-proterozoic	(560-520 Ma) Pan-African Orogeny	Pan-African Orogeny	Zeghouane, 2006; Zeghouane et al., 2008
966	0.785792	16.7739		S504	UHP eclogites	In Edem Well	Mali	Gourma	metaquartzite-eclogite	Sm-Nd TDM	Whole Rock	1670			1670	Paleo-proterozoic	Eburnean Orogeny	Eburnean Orogeny	Jahn et al., 2001
967	0.785792	16.7739		S504	UHP eclogites	In Edem Well	Mali	Gourma	metaquartzite-eclogite	Sm-Nd	Whole Rock	601	13		601±13	Neo-proterozoic	(650-570 Ma) Pan-African Orogeny	Pan-African Orogeny	Jahn et al., 2001
968	0.785792	16.7739		S504	UHP eclogites	In Edem Well	Mali	Gourma	metaquartzite-eclogite	Sm-Nd	Whole Rock	620	13		620±13	Neo-proterozoic	(650-570 Ma) Pan-African Orogeny	Pan-African Orogeny	Jahn et al., 2001
969	0.785792	16.7739		S520	UHP eclogites	In Edem Well	Mali	Gourma	Micaschist	Sm-Nd TDM	Whole Rock	2280			2280	Paleo-proterozoic	Eburnean Orogeny	Eburnean Orogeny	Jahn et al., 2001
970	0.785792	16.7739		S520	UHP eclogites	In Edem Well	Mali	Gourma	Micaschist	Rb-Sr	Whole Rock	614	7		614±7	Neo-proterozoic	(650-570 Ma) Pan-African Orogeny	Pan-African Orogeny	Jahn et al., 2001
971	0.785792	16.7739		S520	UHP eclogites	In Edem Well	Mali	Gourma	Micaschist	40Ar-39Ar	Phengite	1046	12		1046±12	Meso-protezozoic	(1100-870 Ma) Pan-African Rifting-Oceanization	Pan-African Oceanization	Jahn et al., 2001
972	0.785792	16.7739		IC1031	UHP eclogites	In Edem Well	Mali	Gourma	quartzite	40Ar-39Ar	Phengite	623	3		623±3	Neo-proterozoic	(650-570 Ma) Pan-African Orogeny	Pan-African Orogeny	Jahn et al., 2001
973	0.785792	16.7739		1219	UHP eclogites	In Edem Well	Mali	Gourma	Micaschist	40Ar-39Ar	Phengite	754	8		754±8	Neo-proterozoic	(750-665 Ma) Pan-African Orogeny	Pan-African Oceanization	Jahn et al., 2001
974	-4.41788	26.1682			Djebel Drissa ring complex	Djebel Drissa	WAC	Yetti-Eglab	alkaline–peralkaline granite	U-Pb	Zircon	2081	13		2081±13	Paleo-proterozoic	Eburnean Orogeny	Eburnean Orogeny	Kahoui, 1988; Kahoui et al., 1996;Kahoui et al., 2004
975	-3.0282	29.9378				Djebel Bet Touaris	Ougarta	Sbâa		K-Ar	Whole Rock	310			310	Carboniferous	Carboniferous "Hercynian"	Hercyniann Orogeny	Hamdidouche and Aït-Ouali, 2009
976	-2.71815	29.8556				Djebek Bou Kbaissat	Ougarta	Sbâa		K-Ar	Whole Rock	264			264	Permian	Permian "Hercynian"	Hercyniann Orogeny	Hamdidouche and Aït-Ouali, 2009
977	2.79569	23.3277					West Hoggar	IOGU	Charnockitic paragneiss	U-Pb	Zircon	2170			2170	Paleo-proterozoic	Eburnean Orogeny	Eburnean Orogeny	Lancelot et al., 1976
978	2.79569	23.3277					West Hoggar	IOGU	Charnockitic paragneiss	U-Pb	Zircon	2040			2040	Paleo-proterozoic	Eburnean Orogeny	Eburnean Orogeny	Lancelot et al., 1976
979	2.79569	23.3277					West Hoggar	IOGU	Charnockitic paragneiss	U-Pb	Zircon	2900			2900	Archean	Ouzzalian Orogeny	Archean	Lancelot et al., 1976
980	2.79569	23.3277					West Hoggar	IOGU	Charnockitic paragneiss	U-Pb	Zircon	3300			3300	Archean	Ouzzalian Orogeny	Archean	Lancelot et al., 1976
981	7.33497	25.064			Ounane pluton	Ounane	LATEA metacraton	Egéré-Aleskod		Rb-Sr Isochron	Whole Rock	624	15		624±15	Neo-proterozoic	(650-570 Ma) Pan-African Orogeny	Pan-African Orogeny	Liégeois et al., 2003
982	7.33497	25.064			Ounane pluton	Ounane	LATEA metacraton	Egéré-Aleskod		Sm-Nd	Whole Rock	2141	122		2141±122	Paleo-proterozoic	Eburnean Orogeny	Eburnean Orogeny	Liégeois et al., 2003
983	7.2306	24.9614		R676, 678, 679	Tissellilline pluton	Tissellilline	LATEA metacraton	Egéré-Aleskod		Rb-Sr Isochron	Whole Rock	555	15		555±15	Neo-proterozoic	(560-520 Ma) Pan-African Orogeny	Pan-African Orogeny	Liégeois et al., 2003
984	7.2306	24.9614		R676, 678, 680	Tissellilline pluton	Tissellilline	LATEA metacraton	Egéré-Aleskod		Sm-Nd TDM	Whole Rock	2040			2040	Paleo-proterozoic	Eburnean Orogeny	Eburnean Orogeny	Liégeois et al., 2003
985	7.2306	24.9614		R676, 678, 680	Tissellilline pluton	Tissellilline	LATEA metacraton	Egéré-Aleskod		Sm-Nd TDM	Whole Rock	1820			1820	Paleo-proterozoic	Eburnean Orogeny	Eburnean Orogeny	Liégeois et al., 2003
986	11.1283	23.5448			In Ezzane	Algeria	East Hoggar	Djanet	Volcanic rocks	K-Ar	Whole Rock	0			0	Actual	Actual volcanism	Volcanism	Liégeois et al., 2005
987	2.59976	21.3897			East Ouzzal Shear Zone	Tirek	West Hoggar	IOGU	Gabbro	U-Pb	zircon	532	13		532±13	Cambrian	(560-520 Ma) Pan-African Orogeny	Post Pan-African Orogeny	Marignac et al., 1996
988	2.59976	21.3897			East Ouzzal Shear Zone	Tirek	West Hoggar	IOGU	Gabbro	U-Pb	zircon	641	8		641±8	Neo-proterozoic	(650-570 Ma) Pan-African Orogeny	Pan-African Orogeny	Marignac et al., 1996
989	-6.57289	26.7579			Bled M’Dena ring complex	Bled M’Dena	WAC	Yetti-Eglab	gabbro to granodiorite	Rb-Sr Isochron	Whole Rock	2009	190		2009±190	Paleo-proterozoic	Eburnean Orogeny	Eburnean Orogeny	Mohammed et al., 2015
990	9	20.0333			Bous		Aïr	Barghot	Ring complexes	Rb-Sr	Whole Rock	420	40		420±40	Silurian	Silurian "Caledonian"	Caledonian Orogeny	Bowden et al., 1976
991	9	20.0333			Bous		Aïr	Barghot	Ring complexes	Rb-Sr	Whole Rock	487	7		487±7	Cambrian	(520-480 Ma) Pan-African Orogeny	Post Pan-African Orogeny	Karche and Vachette,1978
992	9	20.0333			Bous		Aïr	Barghot	Ring complexes	Rb-Sr Isochron	Whole Rock	406	11		406±11	Devonian	Devonian "Caledonian"	Caledonian Orogeny	Moreau et al., 1994
993	8.06667	19.05			Tamgak		Aïr	Barghot	Ring complexes	Rb-Sr	Whole Rock	455	19		455±19	Ordovician	Ordovician "Taconic"	Post Pan-African Orogeny	Karche and Vachette,1978
994	8.06667	19.05			Tamgak		Aïr	Barghot	Ring complexes	Rb-Sr Isochron	Whole Rock	414	9		414±9	Devonian	Devonian "Caledonian"	Caledonian Orogeny	Moreau et al., 1994
995	8.71667	18.8167			Ofoud + Agueraguer		Aïr	Barghot	Ring complexes	Rb-Sr Isochron	Whole Rock	409	12		409±12	Devonian	Devonian "Caledonian"	Caledonian Orogeny	Moreau et al., 1994
996	8.71667	18.8167			Ofoud + Agueraguer		Aïr	Barghot	Ring complexes	Rb-Sr	Whole Rock	421	15		421±15	Silurian	Silurian "Caledonian"	Caledonian Orogeny	Bowden et al., 1976
997	8.58333	18.3833			Abontorok		Aïr	Barghot	Ring complexes	Rb-Sr	Whole Rock	399	10		399±10	Devonian	Devonian "Caledonian"	Caledonian Orogeny	Brown et al., 1989
998	8.7	18.0167			Egalah		Aïr	Barghot	Ring complexes	Rb-Sr	Whole Rock	435	8		435±8	Silurian	Silurian "Caledonian"	Caledonian Orogeny	Karche and Vachette,1978
999	8.8	18.1			Aroyan		Aïr	Barghot	Ring complexes	Rb-Sr	Whole Rock	426	6		426±6	Silurian	Silurian "Caledonian"	Caledonian Orogeny	Karche and Vachette,1978
1000	8.86667	18.0667			Iskou		Aïr	Barghot	Ring complexes	Rb-Sr	Whole Rock	426	8		426±8	Silurian	Silurian "Caledonian"	Caledonian Orogeny	Karche and Vachette,1978
1001	8.05	17.2			Taghouaji		Aïr	Assodé	Ring complexes	Rb-Sr	Whole Rock	407	6		407±6	Devonian	Devonian "Caledonian" (Pragian-Emsian)	Caledonian Orogeny	Karche and Vachette,1978
1002	8.05	17.2			Taghouaji		Aïr	Assodé	Ring complexes	Rb-Sr	Whole Rock	401	5		401±5	Devonian	Devonian "Caledonian" (Pragian-Emsian)	Caledonian Orogeny	Karche and Vachette,1978
1003	8.70424	22.0144		BT2	Arokam-West orthogneiss		East Hoggar	Aouzegueur	orthogneiss	U–Pb LA-ICP-MS	Zircon	1918	5		1918±5	Paleo-proterozoic	Eburnean Orogeny	Eburnean Orogeny	Nouar et al., 2011
1004	8.70424	22.0144		BT2	Arokam-West orthogneiss		East Hoggar	Aouzegueur	orthogneiss	U–Pb LA-ICP-MS	Zircon	580	26		580±26	Neo-proterozoic	(650-570 Ma) Pan-African Orogeny	Pan-African Orogeny	Nouar et al., 2011
1005	8.70424	22.0144		BT2	Arokam-West orthogneiss		East Hoggar	Aouzegueur	orthogneiss	Rb-Sr	Whole Rock	1622			1622	Paleo-proterozoic	Eburnean Orogeny	Eburnean Orogeny	Nouar et al., 2011
1006	8.75781	21.8023		BT7A	Arokam-East orthogneiss		East Hoggar	Aouzegueur	orthogneiss	Rb-Sr	Whole Rock	1585			1585	Meso-protezozoic	(1600-1200) Pre-Pan-African	Ante-Pan-African	Nouar et al., 2011
1007	8.72262	22.0709		BT3	Hanane pluton		East Hoggar	Aouzegueur	Calc-alkalic granodioritite	U–Pb LA-ICP-MS	Zircon	582	3		582±3	Neo-proterozoic	(650-570 Ma) Pan-African Orogeny	Pan-African Orogeny	Nouar et al., 2011
1008	8.72262	22.0709		BT3	Hanane pluton		East Hoggar	Aouzegueur	Calc-alkalic granodioritite	Rb-Sr	Whole Rock	1448			1448	Meso-protezozoic	(1600-1200) Pre-Pan-African	Ante-Pan-African	Nouar et al., 2011
1009	8.80714	21.8739		BT7B	Abdou pluton		East Hoggar	Aouzegueur	Calc-alkalic granodioritite	Rb-Sr	Whole Rock	974			974	Neo-proterozoic	(1100-870 Ma) Pan-African Rifting-Oceanization	Pan-African Oceanization	Nouar et al., 2011
1010	8.41589	21.4174		BT8	Yvonne composite pluton		East Hoggar	Aouzegueur	alkali-calcic granite	U–Pb LA-ICP-MS	Zircon	595	3		595±3	Neo-proterozoic	(650-570 Ma) Pan-African Orogeny	Pan-African Orogeny	Nouar et al., 2011
1011	8.41589	21.4174		BT8B	Yvonne composite pluton		East Hoggar	Aouzegueur	alkali-calcic granite	Rb-Sr	Whole Rock	2128			2128	Paleo-proterozoic	Eburnean Orogeny	Eburnean Orogeny	Nouar et al., 2011
1012	7.27513	25.0996			Red Gneiss complex	Gour Oumelalen	LATEA metacraton	Egéré-Aleskod	Gneiss	Pb-Pb Isochron	Whole Rock	3476	60		3476±60	Archean	Ouzzalian Orogeny	Archean	Latouche, 1978
1013	10.8492	23.0928		EZ 5	In-Ezzane lavas	In Ezzane	East Hoggar	Djanet	Basaltic flow	K-Ar	Whole Rock	2.86	0.07		2,86 ± 0,07	Pliocene	Pliocene volcanism	Volcanism	Yahiaoui et al., 2014
1014	12.6109	20.7352	478	13	Nord Ouest d'Oleki	Djado		Murzuq	Doleritic Sill	40Ar-39Ar	Whole Rock	369.1	3.7		369,1±3,7	Devonian	Devonian "Caledonian" (Famennian)	Caledonian Orogeny	Denis, 2008
1015	12.6109	20.7352	478	13	Nord Ouest d'Oleki	Djado		Murzuq	Doleritic Sill	40Ar-39Ar	Whole Rock	394.4	3.6		394,4±3,6	Devonian	Devonian "Caledonian" (Emsian)	Caledonian Orogeny	Denis, 2008
1016	12.4569	20.6658	452	15	Col de Sara	Djado		Murzuq	Doleritic dyke	40Ar-39Ar	Whole Rock	357	3.9		357±3,9	Carboniferous	Carboniferous "Hercynian"	Hercyniann Orogeny	Denis, 2008
1017	12.2467	20.6273	428	16	Ouest Col de Sara	Djado		Murzuq	Doleritic dyke	40Ar-39Ar	Whole Rock	321.2	3.4		321,2±3,4	Carboniferous	Carboniferous "Hercynian"	Hercyniann Orogeny	Denis, 2008
1018	12.2467	20.6273	428	16	Ouest Col de Sara	Djado		Murzuq	Doleritic dyke	40Ar-39Ar	Whole Rock	381.1	3.5		381,1±3,5	Devonian	Devonian "Caledonian" (Frasnian)	Caledonian Orogeny	Denis, 2008
1019	-28.4517	10.5684		BD12		Bas-Drâa		Anti-Atlas	Doleritic dyke	U-Pb ID-TIMS	Baddeleyite	1381	8		1381±8	Meso-protezozoic	(1600-1200) Pre-Pan-African	Ante-Pan-African	El Bahat et al., 2013
1020	-28.482	10.7839		BD21		Bas-Drâa		Anti-Atlas	Doleritic dyke	U-Pb ID-TIMS	Baddeleyite	1384	6		1384±6	Meso-protezozoic	(1600-1200) Pre-Pan-African	Ante-Pan-African	El Bahat et al., 2013
1021	-2.93333	32.1333		JM04-07, JM04-09, JM04-12, JM04-14	Roche aurifère de Tamlalt-Menhouhou	Tamlalt-Menhouhou		Anti-Atlas	Métatuffite rhyolitique	Rb-Sr Isochron	Whole Rock	440	40		440±40	Silurian	Silurian "Caledonian"	Caledonian Orogeny	Pelleter, 2007
1022	-2.93333	32.1333		JM04-38		Tamlalt-Menhouhou		Anti-Atlas		40Ar-39Ar	Muscovite	453	7		453±7	Ordovician	Ordovician "Taconic"	Post Pan-African Orogeny	Pelleter, 2007
1023	-2.93333	32.1333		JM04-38		Tamlalt-Menhouhou		Anti-Atlas		40Ar-39Ar	Muscovite	444	8		444±8	Ordovician	Ordovician "Taconic"	Post Pan-African Orogeny	Pelleter, 2007
1024	-2.93333	32.1333		JM04-24		Tamlalt-Menhouhou		Anti-Atlas		40Ar-39Ar	Phengite	288	8		288±8	Permian	Permian "Hercynian"	Hercyniann Orogeny	Pelleter, 2007
1025	-2.93333	32.1333		SJM23-120.3		Tamlalt-Menhouhou		Anti-Atlas		40Ar-39Ar	Phengite	286	5		286±5	Permian	Permian "Hercynian"	Hercyniann Orogeny	Pelleter, 2007
1026	-2.93333	32.1333		JM04-04		Tamlalt-Menhouhou		Anti-Atlas		40Ar-39Ar	Phengite	284	12		284±12	Permian	Permian "Hercynian"	Hercyniann Orogeny	Pelleter, 2007
1027	-2.93333	32.1333		JM04-04		Tamlalt-Menhouhou		Anti-Atlas		40Ar-39Ar	Phengite	297	8		297±8	Permian	Permian "Hercynian"	Hercyniann Orogeny	Pelleter, 2007
1028	-2.93333	32.1333		JM04-04		Tamlalt-Menhouhou		Anti-Atlas		40Ar-39Ar	Phengite	300	5		300±5	Carboniferous	Carboniferous "Hercynian"	Hercyniann Orogeny	Pelleter, 2007
1029	-2.93333	32.1333		SJM28-426		Tamlalt-Menhouhou		Anti-Atlas		U-TH-Pb	Monazite	171	50		171±50	Jurassic	Jurassic Pangea break-up (CAMP)	Jurassic Pangea break-up (CAMP)	Pelleter, 2007
1030	-2.93333	32.1333		SJM28-426		Tamlalt-Menhouhou		Anti-Atlas		U-TH-Pb	Monazite	280			280	Permian	Permian "Hercynian"	Hercyniann Orogeny	Pelleter, 2007
1031	-2.93333	32.1333		SJM28-426		Tamlalt-Menhouhou		Anti-Atlas		U-TH-Pb	Monazite	528	124		528±124	Cambrian	(560-520 Ma) Pan-African Orogeny	Post Pan-African Orogeny	Pelleter, 2007
1032	-2.93333	32.1333		JM04-12		Tamlalt-Menhouhou		Anti-Atlas	Zircon de l'albitite	U-Pb CAMECA IMS1270	Zircon	544	7		544±7	Neo-proterozoic	(560-520 Ma) Pan-African Orogeny	Pan-African Orogeny	Pelleter, 2007
1033	-2.93333	32.1333		JM04-12		Tamlalt-Menhouhou		Anti-Atlas	Zircon de l'albitite	U-Pb CAMECA IMS1270	Zircon	466	4		466±4	Ordovician	Ordovician "Taconic"	Post Pan-African Orogeny	Pelleter, 2007
1034	-2.93333	32.1333		JM04-12		Tamlalt-Menhouhou		Anti-Atlas	Zircon de l'albitite	U-Pb CAMECA IMS1270	Zircon	473	8		473±8	Ordovician	Ordovician "Taconic"	Post Pan-African Orogeny	Pelleter, 2007
1035	-2.93333	32.1333		JM04-12		Tamlalt-Menhouhou		Anti-Atlas	Zircon de l'albitite	U-Pb CAMECA IMS1270	Zircon	487	5		487±5	Cambrian	(520-480 Ma) Pan-African Orogeny	Post Pan-African Orogeny	Pelleter, 2007
1036	-2.93333	32.1333		JM04-14		Tamlalt-Menhouhou		Anti-Atlas	Métatuffite rhyolitique rubanée et albitisée	U-Pb CAMECA IMS1270	Zircon	449	8		449±8	Ordovician	Ordovician "Taconic"	Post Pan-African Orogeny	Pelleter, 2007
1037	-5.72912	31.3458			Taouzzakt granodiorite	Imiter	Anti-Atlas	Saghro inlier	calc-a lkaline granodioritic	U-Pb CAMECA IMS1270	Zircon	572	5		572±5	Neo-proterozoic	(650-570 Ma) Pan-African Orogeny	Pan-African Orogeny	Cheilletz et al., 2002
1038	-5.72912	31.3458			Takhatert	Imiter	Anti-Atlas	Saghro inlier	Rhyolitic volcanism	U-Pb CAMECA IMS1270	Zircon	550	3		550±3	Neo-proterozoic	(560-520 Ma) Pan-African Orogeny	Pan-African Orogeny	Cheilletz et al., 2002
1039	-5.72912	31.3458		IM98-03		Imiter	Anti-Atlas	Saghro inlier	calc-a lkaline granodioritic	40Ar-39Ar	Muscovite	564	5		564±5	Neo-proterozoic	(560-520 Ma) Pan-African Orogeny	Pan-African Orogeny	Cheilletz et al., 2002
1040	-5.72912	31.3458		IM00-53		Imiter	Anti-Atlas	Saghro inlier	calc-a lkaline granodioritic	40Ar-39Ar	Muscovite	560	17		560±17	Neo-proterozoic	(560-520 Ma) Pan-African Orogeny	Pan-African Orogeny	Cheilletz et al., 2002
1041	-5.72912	31.3458		IM99-37		Imiter	Anti-Atlas	Saghro inlier	calc-a lkaline granodioritic	40Ar-39Ar	Muscovite	560	9		560±9	Neo-proterozoic	(560-520 Ma) Pan-African Orogeny	Pan-African Orogeny	Cheilletz et al., 2002
1042	-5.72912	31.3458		IM99-58		Imiter	Anti-Atlas	Saghro inlier	calc-a lkaline granodioritic	40Ar-39Ar	Muscovite	570	10		570±10	Neo-proterozoic	(650-570 Ma) Pan-African Orogeny	Pan-African Orogeny	Cheilletz et al., 2002
1043	-7.95111	29.8492		40905			Anti-Atlas	Tagragra de Tata inlier	Ignimbrite	U-Th-Pb SHRIMP	Zircon	565	7		565±7	Neo-proterozoic	(650-570 Ma) Pan-African Orogeny	Pan-African Orogeny	Walsh et al., 2002
1044	-7.98889	29.9064		41201A			Anti-Atlas	Tagragra de Tata inlier	Felsic metatuff	U-Th-Pb SHRIMP	Zircon	2072.2	8.2		2072,2±8,2	Paleo-proterozoic	Eburnean Orogeny	Eburnean Orogeny	Walsh et al., 2002
1045	-7.80472	29.8447		41307		Targant granite	Anti-Atlas	Tagragra de Tata inlier	Granite	U-Th-Pb SHRIMP	Zircon	2046.3	6.5		2046,3±6,5	Paleo-proterozoic	Eburnean Orogeny	Eburnean Orogeny	Walsh et al., 2002
1046	-7.98833	29.9058		41801			Anti-Atlas	Tagragra de Tata inlier	Dolerite	U-Th-Pb SHRIMP	Zircon	2039.5	6.3		2039,5±6,3	Paleo-proterozoic	Eburnean Orogeny	Eburnean Orogeny	Walsh et al., 2002
1047	-7.83917	29.8256		41902		Oudad granite	Anti-Atlas	Tagragra de Tata inlier	Granite	U-Th-Pb SHRIMP	Zircon	2041	6		2041±6	Paleo-proterozoic	Eburnean Orogeny	Eburnean Orogeny	Walsh et al., 2002
1048	-6.06567	30.9822		G1115	Rhyolite flow at Jebel Amgroud	Upper Ouarzazate Supergroup	Anti-Atlas	Saghro inlier	Rhyolite flow	U-Th-Pb SHRIMP	Zircon	556	4		556±4	Neo-proterozoic	(560-520 Ma) Pan-African Orogeny	Pan-African Orogeny	Walsh et al., 2012
1049	-6.06567	30.9822		G1115	Rhyolite flow at Jebel Amgroud	Upper Ouarzazate Supergroup	Anti-Atlas	Saghro inlier	Rhyolite flow	U-Th-Pb SHRIMP	Zircon	555	5		555±5	Neo-proterozoic	(560-520 Ma) Pan-African Orogeny	Pan-African Orogeny	Walsh et al., 2012
1050	-6.34808	30.8063		B101	Rhyolite flow in the Oued Alqantrat	Upper Ouarzazate Supergroup	Anti-Atlas	Saghro inlier	Rhyolite flow	U-Th-Pb SHRIMP	Zircon	558	4		558±4	Neo-proterozoic	(560-520 Ma) Pan-African Orogeny	Pan-African Orogeny	Walsh et al., 2012
1051	-6.34272	30.8118		B3026		Lower Ouarzazate Supergroup	Anti-Atlas	Saghro inlier	Rhyolite flow	U-Th-Pb SHRIMP	Zircon	571	5		571±5	Neo-proterozoic	(650-570 Ma) Pan-African Orogeny	Pan-African Orogeny	Walsh et al., 2012
1052	-6.62528	30.95		T4218		Lower Ouarzazate Supergroup	Anti-Atlas	Saghro inlier	Rhyodacitic tuff	U-Th-Pb SHRIMP	Zircon	571	5		571±5	Neo-proterozoic	(650-570 Ma) Pan-African Orogeny	Pan-African Orogeny	Walsh et al., 2012
1053	-6.62528	30.95		T4218		Lower Ouarzazate Supergroup	Anti-Atlas	Saghro inlier	Rhyodacitic tuff	U-Th-Pb SHRIMP	Zircon	571	6		571±6	Neo-proterozoic	(650-570 Ma) Pan-African Orogeny	Pan-African Orogeny	Walsh et al., 2012
1054	-6.60083	30.9339		T4216	Rhyolitic tuff of the Oued Dar’a caldera	Lower Ouarzazate Supergroup	Anti-Atlas	Saghro inlier	Rhyolitic tuff	U-Th-Pb SHRIMP	Zircon	574	7		574±7	Neo-proterozoic	(650-570 Ma) Pan-African Orogeny	Pan-African Orogeny	Walsh et al., 2012
1055	-6.60083	30.9339		T4216	Rhyolitic tuff of the Oued Dar’a caldera	Lower Ouarzazate Supergroup	Anti-Atlas	Saghro inlier	Rhyolitic tuff	U-Th-Pb SHRIMP	Zircon	573	5		573±5	Neo-proterozoic	(650-570 Ma) Pan-African Orogeny	Pan-African Orogeny	Walsh et al., 2012
1056	-6.31864	30.9356		B1363	Rhyolitic dike of Timijt swarm	NP3 intrusive rocks	Anti-Atlas	Saghro inlier	Rhyolitic dike	U-Th-Pb SHRIMP	Zircon	562	5		562±5	Neo-proterozoic	(560-520 Ma) Pan-African Orogeny	Pan-African Orogeny	Walsh et al., 2012
1057	-6.16653	31.0256		K1123	Pink Isk-n-Alla granite	NP3 intrusive rocks	Anti-Atlas	Saghro inlier	Granite	U-Th-Pb SHRIMP	Zircon	559	5		559±5	Neo-proterozoic	(560-520 Ma) Pan-African Orogeny	Pan-African Orogeny	Walsh et al., 2012
1058	-6.12647	31.0198		K3052	Gabbro of Tagmout	NP3 intrusive rocks	Anti-Atlas	Saghro inlier	Gabbro	U-Th-Pb SHRIMP	Zircon	556	5		556±5	Neo-proterozoic	(560-520 Ma) Pan-African Orogeny	Pan-African Orogeny	Walsh et al., 2012
1059	-6.2865	30.9237		B1158	Rhyolitic dike of the Bouskour–Sidi Flah swarm	NP3 intrusive rocks	Anti-Atlas	Saghro inlier	Rhyolitic dike	U-Th-Pb SHRIMP	Zircon	563	7		563±7	Neo-proterozoic	(560-520 Ma) Pan-African Orogeny	Pan-African Orogeny	Walsh et al., 2012
1060	-6.2745	30.9109		B1159	Bouskour granite	NP3 intrusive rocks	Anti-Atlas	Saghro inlier	Granite	U-Th-Pb SHRIMP	Zircon	570	5		570±5	Neo-proterozoic	(650-570 Ma) Pan-African Orogeny	Pan-African Orogeny	Walsh et al., 2012
1061	-6.13322	31.1601		K36	Granodiorite of Wizergane	NP3 intrusive rocks	Anti-Atlas	Saghro inlier	Granodiorite	U-Th-Pb SHRIMP	Zircon	576	5		576±5	Neo-proterozoic	(650-570 Ma) Pan-African Orogeny	Pan-African Orogeny	Walsh et al., 2012
1062	-6.39208	30.8479		B1178	Pink microgranite of Assif Tagmout	NP3 intrusive rocks	Anti-Atlas	Saghro inlier	Microgranite	U-Th-Pb SHRIMP	Zircon	574	9		574±9	Neo-proterozoic	(650-570 Ma) Pan-African Orogeny	Pan-African Orogeny	Walsh et al., 2012
1063	-6.35819	30.8074		B1073	Zouzmitane microgranite	NP3 intrusive rocks	Anti-Atlas	Saghro inlier	Microgranite	U-Th-Pb SHRIMP	Zircon	588	7		588±7	Neo-proterozoic	(650-570 Ma) Pan-African Orogeny	Pan-African Orogeny	Walsh et al., 2012
1064	-6.72744	30.5296		S7109	Quartz diorite of Tafrawt (El Graara sub-inlier)	NP2 intrusive rocks	Anti-Atlas	Bou Azzer inlier	Diorite	U-Th-Pb SHRIMP	Zircon	645	7		645±7	Neo-proterozoic	(650-570 Ma) Pan-African Orogeny	Pan-African Orogeny	Walsh et al., 2012
1065	-6.66264	30.5156		S7012	Quartz diorite of Tamellalet (El Graara sub-inlier)	NP2 intrusive rocks	Anti-Atlas	Bou Azzer inlier	Diorite	U-Th-Pb SHRIMP	Zircon	646	8		646±8	Neo-proterozoic	(650-570 Ma) Pan-African Orogeny	Pan-African Orogeny	Walsh et al., 2012
1066	-6.72692	30.5007		S7125	Granodiorite (Tazigzaout sub-inlier)	NP2 intrusive rocks	Anti-Atlas	Bou Azzer inlier	Granodiorite	U-Th-Pb SHRIMP	Zircon	650	10		650±10	Neo-proterozoic	(650-570 Ma) Pan-African Orogeny	Pan-African Orogeny	Walsh et al., 2012
1067	-7.27961	30.6241		Q1	Mimount Formation of the Taghdout Subgroup (detrital zircon)		Anti-Atlas	Sirwa inlier		U-Th-Pb SHRIMP	Zircon	1987			1987	Paleo-proterozoic	Eburnean Orogeny	Eburnean Orogeny	Walsh et al., 2012
1068	-7.27961	30.6241		Q1	Mimount Formation of the Taghdout Subgroup (detrital zircon)		Anti-Atlas	Sirwa inlier		U-Th-Pb SHRIMP	Zircon	2182			2182	Paleo-proterozoic	Eburnean Orogeny	Eburnean Orogeny	Walsh et al., 2012
1069	-7.58222	30.8311		99-07	Tasriwine Ophiolite	Tasriwine		Anti-Atlas	Plagiogranite Dike	U-Pb	Zircon	761	1,9	1,6	761±1,9-1,6	Neo-proterozoic	(840-750) Pan-African Rifting	Pan-African Oceanization	Samson et al., 2004
1070	-7.58222	30.8311		99-07	Tasriwine Ophiolite	Tasriwine		Anti-Atlas	Plagiogranite Dike	Sm-Nd TDM	Whole Rock	767			767	Neo-proterozoic	(840-750) Pan-African Rifting	Pan-African Oceanization	Samson et al., 2004
1071	-7.58222	30.8311		99-06	Tasriwine Ophiolite	Tasriwine		Anti-Atlas	Plagiogranite pluton	U-Pb	Zircon	762	1	2	762±1-2	Neo-proterozoic	(840-750) Pan-African Rifting	Pan-African Oceanization	Samson et al., 2004
1072	-7.58222	30.8311		99-06	Tasriwine Ophiolite	Tasriwine		Anti-Atlas	Plagiogranite pluton	U-Pb	Zircon	763			763	Neo-proterozoic	(840-750) Pan-African Rifting	Pan-African Oceanization	Samson et al., 2004
1073	-7.30803	30.3707		DZ49	Ifzwane dolerite Suite	Zenaga	Anti-Atlas	Zenaga inlier	Dolerite	U-Pb TIMS	Baddeleyite & Zircon	2040	2		2040±2	Paleo-proterozoic	Eburnean Orogeny	Eburnean Orogeny	Kouyaté et al., 2013
1074	-7.17925	30.5831		DZ40		Zenaga	Anti-Atlas	Zenaga inlier	sills	U-Pb TIMS	Baddeleyite & Zircon	1656	9		1656±9	Paleo-proterozoic	Eburnean Orogeny	Eburnean Orogeny	Kouyaté et al., 2013
1075	-7.18494	30.5838		DZ36		Zenaga	Anti-Atlas	Zenaga inlier	sills	U-Pb TIMS	Baddeleyite & Zircon	1640	2		1640±2	Paleo-proterozoic	Eburnean Orogeny	Eburnean Orogeny	Kouyaté et al., 2013
1076	-7.18494	30.5838		DZ36		Zenaga	Anti-Atlas	Zenaga inlier	sills	U-Pb TIMS	Baddeleyite & Zircon	1641	3		1641±3	Paleo-proterozoic	Eburnean Orogeny	Eburnean Orogeny	Kouyaté et al., 2013
1077	-7.80064	30.246		AMHA069		Agadir Melloul	Anti-Atlas	Agadir Melloul inlier	Doleritic dyke	U-Pb TIMS	Baddeleyite & Zircon	1654	16		1654±16	Paleo-proterozoic	Eburnean Orogeny	Eburnean Orogeny	Kouyaté et al., 2013
1078	-7.69558	30.1905		DAS094		Iguerda-Taïfast	Anti-Atlas	Iguerda-Täfast inlier	Doleritic dyke	U-Pb TIMS	Baddeleyite & Zircon	875	19		875±19	Neo-proterozoic	(1100-870 Ma) Pan-African Rifting-Oceanization	Pan-African Oceanization	Kouyaté et al., 2013
1079	-7.69558	30.1905		DAS094		Iguerda-Taïfast	Anti-Atlas	Iguerda-Täfast inlier	Doleritic dyke	U-Pb TIMS	Baddeleyite & Zircon	885	13		885±13	Neo-proterozoic	(1100-870 Ma) Pan-African Rifting-Oceanization	Pan-African Oceanization	Kouyaté et al., 2013
1080	-7.24011	30.5102		DZ2		Zenaga	Anti-Atlas	Zenaga inlier	Doleritic dyke	U-Pb TIMS	Baddeleyite & Zircon	857	11		857±11	Neo-proterozoic	(870-840 Ma) Pan-African Rifting	Pan-African Oceanization	Kouyaté et al., 2013
1081	-7.24011	30.5102		DZ2		Zenaga	Anti-Atlas	Zenaga inlier	Doleritic dyke	U-Pb TIMS	Baddeleyite & Zircon	884	28		884±28	Neo-proterozoic	(1100-870 Ma) Pan-African Rifting-Oceanization	Pan-African Oceanization	Kouyaté et al., 2013
1082	6.43308	23.8701		2854	Arechchoum Formation	Amont oued Ouadenki	LATEA metacraton	Egéré-Aleskod	Gneiss rubanés et mobilisats leucocrates	Rb-Sr Isochron	Whole Rock	540	23		540±23	Cambrian	(560-520 Ma) Pan-African Orogeny	Post Pan-African Orogeny	Bertrand and Lasserre, 1973
1083	6.43308	23.8701			Arechchoum Formation	Amont oued Ouadenki	LATEA metacraton	Egéré-Aleskod	Gneiss rubanés et mobilisats leucocrates	Rb-Sr Isochron	Whole Rock	2240	70		2240±70	Paleo-proterozoic	Eburnean Orogeny	Eburnean Orogeny	Bertrand and Lasserre, 1973
1084	4.87671	22.1225		T22, IC 1023		Abalessa Tinef	LATEA metacraton	Laouni	Orthogneiss	Pb-U	Zircon	604	10	6	604± 10-6	Neo-proterozoic	(650-570 Ma) Pan-African Orogeny	Pan-African Orogeny	Bertrand et al., 1986
1085	5.23583	23.5		T57		Aou Zebaouene	LATEA metacraton	Laouni	Migmatitic granite	Pb-U	Zircon	592	6		592±6	Neo-proterozoic	(650-570 Ma) Pan-African Orogeny	Pan-African Orogeny	Bertrand et al., 1986
1086	4.82748	21.8463			Another pluton connected to the same batholitic belt	South Aouilene	LATEA metacraton	Laouni		U-Pb	Zircon	630			630	Neo-proterozoic	(650-570 Ma) Pan-African Orogeny	Pan-African Orogeny	Boukhalfa, 1987
1087	-1.61222	29.1272				Laadjel, filon du Djouf el Ahmar	Ougarta	Sbâa	phylosilicates Cambrian sediments	K-Ar	Whole Rock	378	17		378±17	Devonian	Devonian "Caledonian" (Frasnian)	Caledonian Orogeny	Bonhomme et al., 1996
1088	2.58196	23.4774			Green Series	In Zize synclinorium-Tanezrouft syncline	West Hoggar	IOGU	volcanic graywackes and associated volcanic-plutonic rocks	U-Pb	Whole Rock	640			640	Neo-proterozoic	(650-570 Ma) Pan-African Orogeny	Pan-African Orogeny	Allègre and Caby, 1972; Allègre, pers. Communication
1089	2.58196	23.4774			Green Series	In Zize synclinorium-Tanezrouft syncline	West Hoggar	IOGU	volcanic graywackes and associated volcanic-plutonic rocks	Rb-Sr Isochron	Whole Rock	580			580	Neo-proterozoic	(650-570 Ma) Pan-African Orogeny	Pan-African Orogeny	Allègre and Caby, 1972; Allègre, pers. Communication
1090	5.23583	23.5		Five samples		wadi Aou Zebéouène	LATEA metacraton	Tefedest	granitic gneisses	Rb-Sr Isochron	Whole Rock	670	20		670±20	Neo-proterozoic	(750-665 Ma) Pan-African Orogeny	Pan-African Orogeny	Vialette and Vitel, 1979
1091	5.05	23.6667			Arechchoum gneisses-In Eker pluton to the Torsournine massif	In Amguel	LATEA metacraton	Tefedest	Four whole-rock samples and one replicate of leucocratic parts of plagioclase-biotite and-or hornblende gneisses, veined and-or banded gneisses	Rb-Sr Isochron	Whole Rock	1330	70		1330±70	Meso-protezozoic	(1600-1200) Pre-Pan-African	Ante-Pan-African	Vialette and Vitel, 1979
1092	5.08056	23.4403			Arechchoum gneisses-In Eker pluton to the Torsournine massif	Ighesn Ouerane	LATEA metacraton	Tefedest	Five samples from the dark part of these gneisses-paléosomes mélanocrates dans des gneiss	Rb-Sr Isochron	Whole Rock	1972	200		1972±200	Paleo-proterozoic	Eburnean Orogeny	Eburnean Orogeny	Vialette and Vitel, 1979
1093	1.78095	24.0259		1191		Ouallen	West Hoggar	Tassendjanet	Granite migmatique à biotite et muscovite	40Ar-39Ar	Whole Rock	1820			1820	Paleo-proterozoic	Eburnean Orogeny	Eburnean Orogeny	Caby, 1967
1094	1.78095	24.0259		1191		Ouallen	West Hoggar	Tassendjanet	Granite migmatique à biotite et muscovite	Sr-Rb	Biotite	745			745	Neo-proterozoic	(750-665 Ma) Pan-African Orogeny	Pan-African Orogeny	Caby, 1967
1095	1.80417	24.1		1192		Ouallen	West Hoggar	Tassendjanet	Orthogneiss	40Ar-39Ar	Whole Rock	1640			1640	Paleo-proterozoic	Eburnean Orogeny	Eburnean Orogeny	Caby, 1967
1096	1.80417	24.1		1192		Ouallen	West Hoggar	Tassendjanet	Orthogneiss	Sr-Rb	Muscovite	1795	50		1795±50	Paleo-proterozoic	Eburnean Orogeny	Eburnean Orogeny	Caby, 1967
1097	7.15833	23.5833		Ms 1460			LATEA metacraton	Serouenout	Leptynite	Rb-Sr	Muscovite	751	10		751±10	Neo-proterozoic	(750-665 Ma) Pan-African Orogeny	Pan-African Oceanization	Guérangé and Lasserre, 1971
1098	7.15833	23.5833		Ms 1461			LATEA metacraton	Serouenout	Quartzite Leptynite	Rb-Sr	Muscovite	693	35		693±35	Neo-proterozoic	(750-665 Ma) Pan-African Orogeny	Pan-African Orogeny	Guérangé and Lasserre, 1971
1099	7.03333	23.6083		B 1462	Granite de Azeguelalah			Egéré-Aleskod	Granite	Rb-Sr	Biotite	547	25		547±25	Neo-proterozoic	(560-520 Ma) Pan-African Orogeny	Pan-African Orogeny	Guérangé and Lasserre, 1971
1100	7.35833	23.6583		B 1463			LATEA metacraton	Serouenout	Orthogneiss	Rb-Sr	Biotite	650	30		650±30	Neo-proterozoic	(650-570 Ma) Pan-African Orogeny	Pan-African Orogeny	Guérangé and Lasserre, 1971
1101	7.35833	23.6583		Ms 1463			LATEA metacraton	Serouenout	Orthogneiss	Rb-Sr	Muscovite	650	50		650±50	Neo-proterozoic	(650-570 Ma) Pan-African Orogeny	Pan-African Orogeny	Guérangé and Lasserre, 1971
1102	7.42778	23.7333		B 1466			LATEA metacraton	Serouenout	Orthogneiss	Rb-Sr	Biotite	614	31		614±31	Neo-proterozoic	(650-570 Ma) Pan-African Orogeny	Pan-African Orogeny	Guérangé and Lasserre, 1971
1103	7.5625	23.7778		Ms 1464			LATEA metacraton	Serouenout	Quartzite micacé	Rb-Sr	Muscovite	949	36		949±36	Neo-proterozoic	(1100-870 Ma) Pan-African Rifting-Oceanization	Pan-African Oceanization	Guérangé and Lasserre, 1971
1104	7.5625	23.7778		Ms 1464			LATEA metacraton	Serouenout	Quartzite micacé	K-Ar	Whole Rock	579	15		579±15	Neo-proterozoic	(650-570 Ma) Pan-African Orogeny	Pan-African Orogeny	Guérangé and Lasserre, 1971
1105	7.55	23.775		B 1465			LATEA metacraton	Serouenout	Metarhyolite	Rb-Sr	Biotite	658	33		658±33	Neo-proterozoic	(750-665 Ma) Pan-African Orogeny	Pan-African Orogeny	Guérangé and Lasserre, 1971
1106	7.875	23.6917		B 1509	Granite du Honag			Tazat	Granite	Rb-Sr	Biotite	561	17		561±17	Neo-proterozoic	(560-520 Ma) Pan-African Orogeny	Pan-African Orogeny	Guérangé and Lasserre, 1971
1107	7.35833	23.6583		1463 (B, Ms, R)		Temasint	LATEA metacraton	Serouenout	Orthogneiss	Sr-Rb Isochron	Whole Rock	561	56		561±56	Neo-proterozoic	(560-520 Ma) Pan-African Orogeny	Pan-African Orogeny	Guérangé and Lasserre, 1971
1108	7.875	23.6917		1509 (B, K-Feldspar, R 1509)			LATEA metacraton	Serouenout		Sr-Rb Isochron	Whole Rock	553	15		553±15	Neo-proterozoic	(560-520 Ma) Pan-African Orogeny	Pan-African Orogeny	Guérangé and Lasserre, 1971
1109	4.50394	22.8791		C.167	Massif Tin Tekadiouit	Silet		Iskel	Granite	U-Pb	Zircon	868	8	5	868±8-5	Neo-proterozoic	(870-840 Ma) Pan-African Rifting	Pan-African Oceanization	Caby et al., 1982
1110	4.50394	22.8791		C.167	Massif Tin Tekadiouit	Silet		Iskel	Granite	U-Pb	Zircon	86	210		86±210	Cretaceous	Cretaceaous	Cretaceaous	Caby et al., 1982
1111	4.50394	22.8791		C.164	Massif Tin Tekadiouit	Silet		Iskel	Granite	U-Pb	Zircon	N/D			N/D				Caby et al., 1982
1112	4.63656	22.9014		C.160	Massif Tin Tekadiouit	Silet		Iskel	Granite	U-Pb	Zircon	N/D			N/D				Caby et al., 1982
1113	4.64823	22.8274		C.169	Massif Taklet	Silet		Iskel	Granite	U-Pb	Zircon	839	4		839±4	Neo-proterozoic	(870-840 Ma) Pan-African Rifting	Pan-African Oceanization	Caby et al., 1982
1114	4.64823	22.8274		C.169	Massif Taklet	Silet		Iskel	Granite	U-Pb	Zircon	61	30		61±30	Paleocene	Paleocene	Paleocene	Caby et al., 1982
1115	4.63275	22.9036		C.162	Massif Taklet	Silet		Iskel	Granite	U-Pb	Zircon	N/D			N/D				Caby et al., 1982
1116	7.22583	24.9758		R650, R666	Ounane and Tisselliline granite	Gour Oumelalen		Egéré-Aleskod	Granodiorite	Rb-Sr	Whole Rock	750			750	Neo-proterozoic	(750-665 Ma) Pan-African Orogeny	Pan-African Orogeny	Latouche and Vidal, 1974
1117	7.22583	24.9758		R650, R666	Ounane and Tisselliline granite	Gour Oumelalen		Egéré-Aleskod	Granodiorite	Rb-Sr	Whole Rock	560			560	Neo-proterozoic	(560-520 Ma) Pan-African Orogeny	Pan-African Orogeny	Latouche and Vidal, 1974
1118	7.22147	25.0463		R648, R755		Gour Oumelalen		Egéré-Aleskod	Pegmatites Leptynites	Rb-Sr	Whole Rock	1870	30		1870±30	Paleo-proterozoic	Eburnean Orogeny	Eburnean Orogeny	Latouche and Vidal, 1974
1119	7.22147	25.0463		R649, R735		Gour Oumelalen		Egéré-Aleskod	Charnockite	Rb-Sr	Whole Rock	2000			2000	Paleo-proterozoic	Eburnean Orogeny	Eburnean Orogeny	Latouche and Vidal, 1974
1120	7.27962	25.0789		R654, R801	Série rouge	Gour Oumelalen		Egéré-Aleskod	Orthogneiss	Rb-Sr	Whole Rock	3300			3300	Archean	Ouzzalian Orogeny	Archean	Latouche and Vidal, 1974
1121	7.27962	25.0789		R654, R801	Série rouge	Gour Oumelalen		Egéré-Aleskod	Orthogneiss	Rb-Sr	Whole Rock	2400			2400	Paleo-proterozoic	Eburnean Orogeny	Eburnean Orogeny	Latouche and Vidal, 1974
1122	2.79569	23.3277		M408		In Ouzzal	West Hoggar	IOGU	Charnockite	U-Pb	Zircon	2170	30		2170±30	Paleo-proterozoic	Eburnean Orogeny	Eburnean Orogeny	Lancelot et al., 1973
1123	2.79569	23.3277		M408		In Ouzzal	West Hoggar	IOGU	Charnockite	U-Pb	Apatite	2170	30		2170±30	Paleo-proterozoic	Eburnean Orogeny	Eburnean Orogeny	Allègre et al., 1972
1124	2.79569	23.3277		M408	In Ouzzal granulites	In Ouzzal	West Hoggar	IOGU	high-grade gneisses	Rb-Sr Isochron	Whole Rock	3100			3100	Archean	Ouzzalian Orogeny	Archean	Allègre and Caby, 1972
1125	2.79569	23.3277		M408	In Ouzzal granulites	In Ouzzal	West Hoggar	IOGU	high-grade gneisses	Rb-Sr Isochron	Whole Rock	3300			3300	Archean	Ouzzalian Orogeny	Archean	Allègre and Caby, 1972
1126	2.89509	23.2532			In Ouzzal granulites	In Ouzzal	West Hoggar	IOGU	Pegmatites	Rb-Sr Isochron	Whole Rock	2050			2050	Paleo-proterozoic	Eburnean Orogeny	Eburnean Orogeny	Allègre and Caby, 1972
1127	2.6344	23.5131			Rhyolite In Zize	In Ouzzal	West Hoggar	IOGU	Rhyolite	Rb-Sr Isochron	Whole Rock	530			530	Cambrian	(560-520 Ma) Pan-African Orogeny	Post Pan-African Orogeny	Allègre and Caby, 1972
1128	2.83696	23.3175		11	In Ouzzal granulites	In Ouzzal	West Hoggar	IOGU	gneisses+charnockitic granitoïds	Rb-Sr Isochron	Whole Rock	2860	60		2860±60	Archean	Ouzzalian Orogeny	Archean	Ferrara and Gravelle, 1966
1129	2.79569	23.3277		10	In Ouzzal granulites	In Ouzzal	West Hoggar	IOGU	Charnockite	Rb-Sr Isochron	Whole Rock	2050			2050	Paleo-proterozoic	Eburnean Orogeny	Eburnean Orogeny	Rousseau et al., 1975
1130	2.79569	23.3277		14			West Hoggar	IOGU	Charnockite	U-TH-Pb	Zircon	3100			3100	Archean	Ouzzalian Orogeny	Archean	Rousseau et al., 1975
1131	2.79569	23.3277		14			West Hoggar	IOGU	Charnockite	U-TH-Pb	Zircon	2100			2100	Paleo-proterozoic	Eburnean Orogeny	Eburnean Orogeny	Rousseau et al., 1975
1132	2.79569	23.3277					West Hoggar	IOGU	Charnockite	Rb-Sr	Whole Rock	3500			3500	Archean	Ouzzalian Orogeny	Archean	Rousseau et al., 1975
1133	2.79569	23.3277					West Hoggar	IOGU	Charnockite	Rb-Sr	Whole Rock	3100			3100	Archean	Ouzzalian Orogeny	Archean	Rousseau et al., 1975
1134	1.76154	24.0332		1191?	Tassendjanet granites	Tassendjanet	West Hoggar	Tassendjanet	Granites	Rb-Sr Isochron	Whole Rock	1960			1960	Paleo-proterozoic	Eburnean Orogeny	Eburnean Orogeny	Dupré et al., 1975
1135	1.76154	24.0332		1191?	Tassendjanet granites	Tassendjanet	West Hoggar	Tassendjanet	Granites	Rb-Sr Isochron	Whole Rock	2090			2090	Paleo-proterozoic	Eburnean Orogeny	Eburnean Orogeny	Dupré et al., 1975
1136	1.76154	24.0332		1191?	Tassendjanet granites	Tassendjanet	West Hoggar	Tassendjanet	Granites	Pb-Pb	Whole Rock	2080			2080	Paleo-proterozoic	Eburnean Orogeny	Eburnean Orogeny	Dupré et al., 1975
1137	1.76154	24.0332		1191?	Tassendjanet granites	Tassendjanet	West Hoggar	Tassendjanet	Granites	U-TH-Pb	Zircon	2090			2090	Paleo-proterozoic	Eburnean Orogeny	Eburnean Orogeny	Dupré et al., 1975
1138	2.6344	23.5131			Rhyolite In Zize	In Ouzzal	West Hoggar	IOGU	Rhyolite	Rb-Sr	Whole Rock	550	30		550±30	Neo-proterozoic	(560-520 Ma) Pan-African Orogeny	Pan-African Orogeny	Caby, 1967
1139	2.87227	23.433		L101		In Ouzzal	West Hoggar	IOGU	Charnockite	Nd-Sm	Whole Rock	3473			3473	Archean	Ouzzalian Orogeny	Archean	Ben Othman et al., 1984
1140	2.87227	23.433		L101		In Ouzzal	West Hoggar	IOGU	Charnockite	Rb-Sr	Whole Rock	2946			2946	Archean	Ouzzalian Orogeny	Archean	Ben Othman et al., 1984
1141	2.87227	23.433		L101		In Ouzzal	West Hoggar	IOGU	Charnockite	Rb-Sr	Whole Rock	3055			3055	Archean	Ouzzalian Orogeny	Archean	Ben Othman et al., 1984
1142	2.87227	23.433		L101		In Ouzzal	West Hoggar	IOGU	Charnockite	Nd-Sm	Whole Rock	2100			2100	Paleo-proterozoic	Eburnean Orogeny	Eburnean Orogeny	Ben Othman et al., 1984
1143	4.87671	22.1225		T22, IC 1023		Abalessa Tinef	LATEA metacraton	Laouni	Orthogneiss	Pb-U	Zircon	604	10	6	604±10-6	Neo-proterozoic	(650-570 Ma) Pan-African Orogeny	Pan-African Orogeny	Bertrand et al., 1986
1144	5.23583	23.5		T57		Aou Zebaouene	LATEA metacraton	Laouni	Migmatitic granite	Pb-U	Zircon	592	6		592±6	Neo-proterozoic	(650-570 Ma) Pan-African Orogeny	Pan-African Orogeny	Bertrand et al., 1986
1145	2.6344	23.5131				In Zize	West Hoggar	IOGU	Granitoid	U-Pb	Zircon	600			600	Neo-proterozoic	(650-570 Ma) Pan-African Orogeny	Pan-African Orogeny	Allègre and Ben Othman, 1980
1146	2.6344	23.5131				In Zize	West Hoggar	IOGU	Granitoid	Sm-Nd TDM	Whole Rock	1930			1930	Paleo-proterozoic	Eburnean Orogeny	Eburnean Orogeny	Allègre and Ben Othman, 1980
1147	1.76154	24.0332		L481		Tassendjanet	West Hoggar	Tassendjanet	Granitoid	U-Pb	Zircon	2090			2090	Paleo-proterozoic	Eburnean Orogeny	Eburnean Orogeny	Allègre and Ben Othman, 1980
1148	1.76154	24.0332		L481		Tassendjanet	West Hoggar	Tassendjanet	Granitoid	Sm-Nd TDM	Whole Rock	1930			1930	Paleo-proterozoic	Eburnean Orogeny	Eburnean Orogeny	Allègre and Ben Othman, 1980
1149	1.76154	24.0332		M697		Tassendjanet	West Hoggar	Tassendjanet	Granitoid	U-Pb	Zircon	2090			2090	Paleo-proterozoic	Eburnean Orogeny	Eburnean Orogeny	Allègre and Ben Othman, 1980
1150	1.76154	24.0332		M697		Tassendjanet	West Hoggar	Tassendjanet	Granitoid	Sm-Nd TDM	Whole Rock	1980			1980	Paleo-proterozoic	Eburnean Orogeny	Eburnean Orogeny	Allègre and Ben Othman, 1980
1151	2.79569	23.3277					West Hoggar	IOGU	Carbonatite	U-TH-Pb	Hydroxyapatite	2090			2090	Paleo-proterozoic	Eburnean Orogeny	Eburnean Orogeny	Allegre et al., 1972
1152	0.624373	20.506		IC 431		Tilemsi	Adrar des Iforas	Tirek	Gabbro	U-Pb	Zircon	730				Neo-proterozoic	(750-665 Ma) Pan-African Orogeny	Pan-African Orogeny	Caby et al., 1989
1153	0.570526	20.4867		IC 1569		Tilemsi	Adrar des Iforas	Tirek	Leucosome grey gneisses	U-Pb	Zircon	710	6	5	710+6/-5	Neo-proterozoic	(750-665 Ma) Pan-African Orogeny	Pan-African Orogeny	Caby et al., 1989
1154	0.615229	20.3068		IC 1582-IC 1581		Tilemsi	Adrar des Iforas	Tirek	Metaquartz Diorite	U-Pb	Zircon	726	7	3	726+7/-6	Neo-proterozoic	(750-665 Ma) Pan-African Orogeny	Pan-African Orogeny	Caby et al., 1989
1155	0.883451	19.5342		IC 329-330		Tilemsi	Adrar des Iforas	Kidal	calc-a lkaline granites (Granodiorites)	U-Pb	Zircon	635	5			Neo-proterozoic	(650-570 Ma) Pan-African Orogeny	Pan-African Orogeny	Caby et al., 1989
1156	0.605431	20.3167		IC 425-427		Tilemsi	Adrar des Iforas	Tirek	Leucosome grey gneisses	U-Pb	Zircon	N/D			N/D				Caby et al., 1989
1157	0.883451	19.5342		IC 329-330		Tilemsi	Adrar des Iforas	Kidal	calc-a lkaline granites (Granodiorites)	Sr-Nd TDM	Zircon	1690			1690	Paleo-proterozoic	Eburnean Orogeny	Eburnean Orogeny	Caby et al., 1989
1158	0.605431	20.3167		IC 425-427		Tilemsi	Adrar des Iforas	Tirek	Leucosome grey gneisses	Sr-Nd TDM	Zircon	940				Neo-proterozoic	(1100-870 Ma) Pan-African Rifting-Oceanization	Pan-African Oceanization	Caby et al., 1989
1159	0.624373	20.506		IC 431		Tilemsi	Adrar des Iforas	Tirek	Gabbro	Sr-Nd TDM	Zircon	710				Neo-proterozoic	(750-665 Ma) Pan-African Orogeny	Pan-African Orogeny	Caby et al., 1989
1160	10.6042	24.039		AF-ALG/Dj-Ste58	Arrikine sill	Arrikine, In Djerane	East Hoggar	Djanet	Gabbro	K-Ar	Zircon	325.6	7.7		325,6±7,7	Carboniferous	Carboniferous "Hercynian"	Hercyniann Orogeny	Derder et al., 2016
1161	10.6042	24.039			Arrikine sill	Arrikine, In Djerane	East Hoggar	Djanet	Gabbro	U–Pb LA-ICP-MS	Zircon	2028	15		2028±15	Paleo-proterozoic	Eburnean Orogeny	Eburnean Orogeny	Derder et al., 2016
1162	10.6042	24.039			Arrikine sill	Arrikine, In Djerane	East Hoggar	Djanet	Gabbro	U–Pb LA-ICP-MS	Zircon	2698	22		2689±22	Archean	Liberian Orogeny	Archean	Derder et al., 2016
1163	10.6042	24.039			Arrikine sill	Arrikine, In Djerane	East Hoggar	Djanet	Gabbro	U–Pb LA-ICP-MS	Zircon	598	15			Neo-proterozoic	(650-570 Ma) Pan-African Orogeny	Pan-African Orogeny	Derder et al., 2016
1164	10.6042	24.039			Arrikine sill	Arrikine, In Djerane	East Hoggar	Djanet	Gabbro	U–Pb LA-ICP-MS	Zircon	632	10			Neo-proterozoic	(650-570 Ma) Pan-African Orogeny	Pan-African Orogeny	Derder et al., 2016
1165	10.6042	24.039			Arrikine sill	Arrikine, In Djerane	East Hoggar	Djanet	Gabbro	U–Pb LA-ICP-MS	Zircon	682	7			Neo-proterozoic	(750-665 Ma) Pan-African Orogeny	Pan-African Orogeny	Derder et al., 2016
1166	3.12657	24.3466				Adrar Ahnet	West Hoggar	Ahnet	Quatzite	Relative datation		1755			1755	Paleo-proterozoic	Eburnean Orogeny	Eburnean Orogeny	Moussine-Pouchkine et al., 1988
1167	3.12657	24.3466				Adrar Ahnet	West Hoggar	Ahnet	Quatzite	Relative datation		1837			1837	Paleo-proterozoic	Eburnean Orogeny	Eburnean Orogeny	Moussine-Pouchkine et al., 1988
1168	3.12657	24.3466				Adrar Ahnet	West Hoggar	Ahnet	Stromatolithes	Relative datation		900			900	Neo-proterozoic	(870-840 Ma) Pan-African Rifting	Pan-African Oceanization	Moussine-Pouchkine et al., 1988
1169	3.12657	24.3466				Adrar Ahnet	West Hoggar	Ahnet	Stromatolithes	Relative datation		700			700	Neo-proterozoic	(870-840 Ma) Pan-African Rifting	Pan-African Oceanization	Moussine-Pouchkine et al., 1988
1170	1.08556	24.7554				Ouallen	West Hoggar		Migmatitic gneiss		?	2000			2000	Paleo-proterozoic	Eburnean Orogeny	Eburnean Orogeny	Bertrand and Caby, 1978; Bertrad and Lasserre, 1976
1171	15.2906	23.9			Horst Mourizidié	Mourizidié	Tibesti	Murzuq		K-Ar		489	10		489±10	Cambrian	Ordovician "Taconic"	Post Pan-African Orogeny	Cahen et al., 1984
1172	15.2906	23.9			Horst Mourizidié	Mourizidié	Tibesti	Murzuq		K-Ar		480	10		480±10	Ordovician	Ordovician "Taconic"	Post Pan-African Orogeny	Cahen et al., 1984
1173	15.2906	23.9			Horst Mourizidié	Mourizidié	Tibesti	Murzuq		K-Ar		476	9		476±9	Ordovician	Ordovician "Taconic"	Post Pan-African Orogeny	Cahen et al., 1984
1174	5.523	23.1722				Greisen du Taessa	LATEA metacraton	Tefedest		K-Ar	Muscovite	490	25		490±25	Cambrian	Ordovician "Taconic"	Post Pan-African Orogeny	Cahen et al., 1984
1175	5.72869	22.8802				Aheleleg	LATEA metacraton	Laouni	Pegmatite	K-Ar	Biotite	478	25		478±25	Ordovician	Ordovician "Taconic"	Post Pan-African Orogeny	Cahen et al., 1984
1176	8.9954	20.347				Adrar Bous	Aïr	Barghot	Granite	Rb-Sr		487	5		487±5	Cambrian	Ordovician "Taconic"	Post Pan-African Orogeny	Cahen et al., 1984
1177	8.07262	33.066				Coastal Meseta	Marocco	Marocco	Alcalin volcano-sedimentary	K-Ar	shale minx fine fraction	447	12		447±12	Ordovician	Ordovician "Taconic"	Post Pan-African Orogeny	El Kamel et al., 1998
